1 Article

2 **Whole-genome duplication in an algal symbiont bolsters coral heat**  
3 **tolerance**

4 Katherine E. Dougan<sup>1,2\*</sup>, Anthony J. Bellantuono<sup>3</sup>, Tim Kahlke<sup>4</sup>, Raffaella M. Abbriano<sup>4</sup>, Yibi  
5 Chen<sup>1</sup>, Sarah Shah<sup>1</sup>, Camila Granados-Cifuentes<sup>2</sup>, Madeleine J. H. van Oppen<sup>5,6</sup>, Debashish  
6 Bhattacharya<sup>7</sup>, David J. Suggett<sup>4,8</sup>, Mauricio Rodriguez-Lanetty<sup>2\*</sup>, Cheong Xin Chan<sup>1\*</sup>

7 <sup>1</sup>The University of Queensland, School of Chemistry and Molecular Biosciences, Australian  
8 Centre for Ecogenomics, Brisbane, QLD 4072, Australia

9 <sup>2</sup>Florida International University, Department of Biological Sciences, Miami, FL 33099, U.S.A.

10 <sup>3</sup>Florida International University, Department of Biological Sciences, Biomolecular Science  
11 Institute, Miami, FL 33099, U.S.A.

12 <sup>4</sup>University of Technology Sydney, Climate Change Cluster, NSW 2007, Australia

13 <sup>5</sup>School of Biosciences, The University of Melbourne, Parkville, VIC 3010, Australia

14 <sup>6</sup>Australian Institute of Marine Science, Townsville, QLD 4810, Australia

15 <sup>7</sup>Rutgers University, Department of Biochemistry and Microbiology, New Brunswick, NJ 08901,  
16 U.S.A.

17 <sup>8</sup>King Abdullah University of Science and Technology, KAUST Reefscape Restoration Initiative  
18 (KRRI) and Red Sea Research Center (RSRC), Thuwal, 23955, Saudi Arabia

19 \*Authors to whom correspondence and material requests should be addressed: Katherine E.  
20 Dougan ([k.dougan@uq.edu.au](mailto:k.dougan@uq.edu.au)), Mauricio Rodriguez-Lanetty ([rodmauri@fiu.edu](mailto:rodmauri@fiu.edu)), and Cheong  
21 Xin Chan ([c.chan1@uq.edu.au](mailto:c.chan1@uq.edu.au))

22

## 23 **Abstract**

24 The algal endosymbiont *Durusdinium trenchii* enhances the resilience of coral reefs under  
25 thermal stress<sup>1,2</sup>. As an endosymbiont, *D. trenchii* is generally expected to have a reduced  
26 genome compared to its free-living relatives, due in part to the lack of selective pressure for  
27 maintaining redundant gene functions in a stable intracellular environment within the host<sup>3</sup>.  
28 However, *D. trenchii* can live freely or in endosymbiosis, and the analysis of genetic markers<sup>4</sup>  
29 suggests that this species has undergone whole-genome duplication (WGD). Here we present  
30 genome assemblies for two *D. trenchii* isolates, confirm WGD in these taxa, and examine how  
31 selection has shaped the duplicated genome regions. We assess how the competing free-living  
32 versus endosymbiotic lifestyles of *D. trenchii* have contributed to the retention and divergence of  
33 duplicated genes, and how these processes have enhanced thermotolerance of corals hosting  
34 these symbionts. We find that lifestyle is the driver of post-WGD evolution in *D. trenchii*, with  
35 the free-living phase being most important, followed by endosymbiosis. Adaptations to both  
36 lifestyles collectively result in increased cellular fitness for *D. trenchii*, which provides enhanced  
37 thermal stress protection to the host coral. Beyond corals, this polyploid alga is a valuable model  
38 for understanding how genome-wide selective forces act to balance the often, divergent  
39 constraints imposed by competing lifestyles.

## 40 **Main text**

41 Uncovering the foundations of biotic interactions, particularly symbiosis, remains a central goal  
42 for research, given that virtually no organism lives in isolation. Coral reefs are marine  
43 biodiversity hotspots that are founded upon symbioses involving dinoflagellate algae in the  
44 Family Symbiodiniaceae<sup>5</sup>. These symbionts are the “solar power plants” of reefs, providing  
45 photosynthetically fixed carbon and other metabolites to the coral host<sup>6,7</sup>. Breakdown of the

46 coral-dinoflagellate symbiosis (i.e. coral bleaching), often due to ocean warming, puts corals at  
47 risk of starvation, disease, and eventual death. Symbiodiniaceae microalgae are diverse, with at  
48 least 15 clades including 11 named genera<sup>5,8-10</sup>, encompassing a broad spectrum of symbiotic  
49 associations and host-specificity. Most of these taxa are facultative symbionts (i.e. they can live  
50 freely or in symbiosis), although exclusively symbiotic or free-living species also exist<sup>5</sup>.

51 Genomes of Symbiodiniaceae are believed to reflect the diversification and specialization of  
52 these taxa to inhabit distinct ecological niches<sup>3,11</sup>. The genomes of symbionts, due to spatial  
53 confinement, are predicted to undergo structural rearrangements, streamlining, and rapid genetic  
54 drift (e.g. pseudogenization)<sup>3</sup>. These traits are present in symbiotic Symbiodiniaceae<sup>11</sup>.

55 Whole-genome duplication (WGD) is an evolutionary mechanism for generating functional  
56 novelty and genomic innovation<sup>12,13</sup>, and can occur due to errors in meiosis, i.e. via  
57 autopolyploidy. Following WGD, the evolutionary trajectory of duplicated sequence regions  
58 generally proceeds from large-scale purging, temporary retention and/or divergence, to  
59 fixation<sup>14</sup>. WGD-derived duplicated genes (i.e. *ohnologs*<sup>15,16</sup>) that are retained can provide a  
60 selective advantage and enhance fitness through increased gene dosage, specialization in  
61 function, and/or the acquisition of novel functions<sup>14</sup>.

62 WGD has been described in free-living unicellular eukaryotes such as yeast<sup>17-19</sup>, ciliates<sup>20,21</sup>, and  
63 diatoms<sup>22,23</sup>, but not in symbiotic species. Evidence of WGD is absent in the Symbiodiniaceae,  
64 except for the genus *Durusdinium*, as observed in microsatellite sequence data<sup>4</sup>. This genus  
65 includes the thermotolerant species *Durusdinium trenchii* (Fig. 1a), a facultative symbiont that  
66 confers heat-tolerance to corals, thereby enhancing holobiont resilience under thermal stress<sup>24</sup>.

67 We hypothesize that WGD played a critical role in enhancing heat-tolerance in this species.  
68 Specifically, the facultative lifestyle (i.e. free-living or symbiotic) of *D. trenchii* favoured

69 fixation of WGD during the free-living phase as an adaptation to fluctuating environmental  
70 conditions, with the expanded gene inventory being further modified by the coral symbiosis. To  
71 test this “dual lifestyle” hypothesis, we generated *de novo* genome assemblies from two isolates  
72 of *D. trenchii* and analysed their evolutionary trajectories. Predictions of our hypothesis were  
73 tested against the null model of a single, free-living, lifestyle for this species. Based on gene  
74 expression profiles, we elucidate how the facultative lifestyle has contributed to the fate of  
75 ohnologs in these microalgae, and how natural selection acting on gene families has increased  
76 thermotolerance of corals hosting *D. trenchii* symbionts. These data provide strong evidence for  
77 the dual lifestyle hypothesis as a driver of post-WGD genome evolution.

#### 78 **Whole-genome duplication in a coral endosymbiont**

79 We generated *de novo* genome assemblies from *D. trenchii* CCMP2556 (total length = 1.71 Gb;  
80 N50 = 774.26 kb) and *D. trenchii* SCF082 (total length = 1.64 Gb; N50 = 398.48 kb) using 10X  
81 Genomics linked reads (Tables S1 and S2). The two genomes are highly similar in terms of  
82 whole-genome sequence (Table S3, ~99.7% shared identity), size (Table S4), and repeat  
83 landscapes (Fig. 1b, Fig. S1), yielding ~54,000 protein-coding genes (Table S5) with a  
84 comparable level of data completeness to other genome assemblies of Symbiodiniaceae (Table  
85 S6; see Methods). To assess WGD in *D. trenchii*, we followed González-Pech *et al.*<sup>11</sup> to identify  
86 collinear gene blocks within each genome (Fig. 1c, see Methods); these blocks likely arose via  
87 segmental duplication and/or WGD. We identified 864 blocks implicating 27,597 (49.46% of the  
88 total 55,799) genes in CCMP2556, and 776 blocks implicating 18,209 (34.02% of the total  
89 53,519) genes in SCF082 (Tables S7 and S8). The proportion of genes present in collinear blocks  
90 in *D. trenchii* is ~49-fold greater (Fig. 1d) than that in other Symbiodiniaceae and the outgroup  
91 dinoflagellate *Polarella*, which have not experienced WGD. We also observed a high extent of

92 conserved synteny (22,041 CCMP2556 genes syntenic with 21,094 SCF082 genes), with  
93 ohnologs predominant in these syntenic blocks (CCMP2556: 15,395 [69.85%]; SCF082: 12,617  
94 [59.31%]) (Fig. 1e, Figure S2, and Table S9). Using homologous protein sets derived from  
95 available whole-genome data, our inference of lineage-specific duplicated genes (see Methods)  
96 revealed 7,945 gene duplication events specific to *D. trenchii*, which is an order of magnitude  
97 greater than in other Symbiodiniaceae (Fig. 1f).

98 Examination of the overall distribution of DNA synonymous substitutions ( $K_S$ ) showed a distinct  
99 peak (Fig. S3), as expected following WGD; the small peak values are explained by the recency  
100 of this event in *D. trenchii*<sup>25</sup>. The WGD likely occurred after the split of *D. trenchii* from its  
101 sister *Durusdinium glynnii* 0.11–1.93 million years ago (MYA), based on LSU rDNA genetic  
102 divergence estimates<sup>5</sup>. Our analysis of whole-genome data following Ladner *et al.*<sup>26</sup> aligns with  
103 these estimates of a Pleistocene origin in the Indo-Pacific (Supplementary Information), a period  
104 of frequent sea-level changes in this region<sup>27</sup>. These results, based on independently assembled  
105 genomes from two isolates, combined with the extent and size of the gene blocks (Table S7 and  
106 Fig. S2), provide unambiguous evidence for WGD in *D. trenchii*.

### 107 **Asymmetric divergence of ohnolog-pair expression**

108 To assess putative ohnolog functions in *D. trenchii*, we analysed transcriptome data of  
109 CCMP2556<sup>28</sup> that were generated from free-living cells in culture and from cells in  
110 endosymbiosis with the anemone *Exaiptasia pallida*, both under ambient (28°C) and thermal  
111 stress (34°C) conditions. We focused on 6,147 expressed ohnolog-pairs that were supported by  
112 10 or more mapped transcripts in  $\geq 50\%$  of the samples, and inferred gene co-expression  
113 networks (Fig. S4 and Table S10) using weighted gene co-expression network analysis  
114 (WGCNA). Most (4,412 [71.7%] of 6,147) ohnolog-pairs were recovered in different networks,

115 indicating the prevalence of expression divergence between duplicates post-WGD. We then  
116 classified ohnolog pairs into five groups based on their differential expression (DE) patterns  
117 (Figs 2A, S5-S9; see Methods). Each group exhibited different characteristics (Table S11)  
118 relative to expression (Fig. 2a-b), sequence similarity (Fig. S10), gene structure (i.e. exon  
119 gain/loss; Fig. 2c), and/or alternative splicing (Fig. S11-S12); see Supplementary Information.  
120 Ohnolog-pairs that were differentially expressed between lifestyles observed in only one copy  
121 (Group 2; 2,244 [36.5%]); Fig. 2d), and those with opposing differential expression observed  
122 in any one comparison (Group 5; 100 [1.6%]; Fig. 2e; Table S12) from strongly contrasting  
123 expression profiles (most Pearson correlation coefficients  $< 0$ ; Fig. 2b), showed significantly  
124 elevated levels of positive selection, exon gain/loss, sequence divergence, and differential exon  
125 usage (DEU; Table S13) relative to the other three groups (all pairwise Wilcox  $p < 0.05$ ;  
126 Supplementary Information); these differences were not attributed to the differing number of  
127 splice junctions per gene, and ohnologs show greater extent of alternative splicing than  
128 singletons (Fig. S13 and Table S14).

129 Divergence of expression between ohnologs within a pair can have different outcomes, including  
130 the change in expression specificity, an important mechanism for adaptation after WGD. We  
131 assessed expression specificity using the  $\tau$  index<sup>29</sup> that ranges between 0 (i.e. broad expression,  
132 low specificity) to 1 (i.e. narrow expression, high specificity) for all genes that passed the  
133 WGCNA quality filtering. We identified 3,508 genes of high expression specificity ( $\tau > 0.7$ ), of  
134 which 1,893 (53.96%) were ohnologs (Table S15). Compared to singletons and other duplicate  
135 types (except for proximal duplicates), the ohnologs exhibited significantly elevated  $\tau$  (Fig. S14,  
136 Kruskal-Wallis test;  $p < 10^{-5}$ ), indicating narrow expression profiles that are more specialized to  
137 distinct conditions. This divergence in expression was observed in Group 2 pairs (Fig. S6), for

138 which the differentially expressed copy in each pair showed higher  $\tau$  and variance in expression  
139 relative to its counterpart (Kruskal-Wallis test;  $p < 10^{-15}$ ). Whereas most instances of specialized  
140 expression are associated with the free-living lifestyle (Table S16), this specialization reflects  
141 response to temperatures among the dispersed duplicates (i.e. duplicates separated by >20 genes;  
142 Chi-square test post-hoc:  $p=0$ , residuals=6.15 at 34°C) and the ohnologs ( $p < 0.05$ ,  
143 residuals=3.10 at 28°C). Interestingly, only ohnologs displayed a tendency towards expression  
144 specialization in the symbiotic lifestyle at both 28°C (Chi-square test post-hoc:  $p < 0.01$ ,  
145 residuals=3.61) and 34°C ( $p < 0.01$ , residuals=3.89; Table S16). Although the post-WGD  
146 specialization described here relates to lifestyle, parallels are known in multicellular organisms  
147 whereby the partitioning of expression across spatiotemporal scales is often observed in different  
148 tissues, organs, or developmental stages<sup>14,30</sup>. In post-WGD yeasts, this trend may represent the  
149 uncoupling of noise and plasticity in gene expression that enables dynamic gene-expression  
150 responses in one of the two duplicates<sup>31</sup>. In *D. trenchii*, this trait may provide greater flexibility  
151 in gene expression when cells are free-living or experiencing temperature stress.

152 The up-regulation or specialization of gene expression by some ohnolog-pairs to different  
153 lifestyles in *D. trenchii* appears to either be mediated by, or coincide with, alterations in exon  
154 organization. Evolution of WGD-derived genes can lead to loss and/or diversification of  
155 alternative spliced forms, and the partitioning of ancestral splice forms between gene duplicates.  
156 We investigated this issue by examining the interplay of sequence conservation in exonic  
157 sequences with patterns of splice junction conservation and DEU within ohnolog pairs. Based on  
158 mean percentage of shared exons per pair, the ohnolog pairs in Group 5 (13.35%) had lower  
159 exonic conservation compared to other groups (>16%). DEU across all groups were biased  
160 toward functions associated with the free-living lifestyle. Nearly all ohnolog pairs in Group 5 (95

161 of 100; Fig. 2e and Fig. S9) displayed contrasting differential expression between free-living and  
162 symbiotic phases at one or both temperatures, underscoring lifestyle as a strong driver of  
163 expression divergence (Supplementary Information). Group 5 ohnologs that are specialized for  
164 the symbiotic lifestyle exhibited lower overall DEU, and possessed fewer exons than their  
165 counterparts that were up-regulated under the free-living lifestyle (Wilcoxon rank sum test,  $p =$   
166  $0.015$ ,  $V = 2435.5$ ). These ohnologs also contained exons that were more dominantly expressed  
167 during the symbiotic lifestyle (Fig. 3a, Wilcoxon rank sum test,  $p = 0.02798$ ,  $V = 2540$ ). Such a  
168 bias in DEU composition towards symbiosis-specialized exons was not observed in the other  
169 groups, e.g. Group 2 (Fig. 3b-c). Consequently, the symbiosis-specific DEU, together with the  
170 overall decrease in per-gene exons and DEU among symbiosis-associated ohnologs in Group 5,  
171 suggest a symbiosis-specific streamlining of gene function. Together with our observation of  
172 RNA editing (Tables S17 and S18, Figure S15; Supplementary Information), these results  
173 collectively indicate that alterations to gene structure and alternative splicing drive expression  
174 divergence of ohnologs in *D. trenchii* that are explained by algal lifestyle.

175 Although genomic streamlining is usually associated with obligate endosymbionts rather than  
176 facultative symbionts, gene duplication may facilitate streamlining in one of the two duplicates  
177 in favour of symbiotic lifestyle. Ohnolog pairs of Group 5 were significantly enriched for key  
178 functions (Table S19), such as the processing of glutamine and production of the key antioxidant  
179 of glutathione, which have been linked to nitrogen cycling associated with symbiosis<sup>32,33</sup>; the  
180 implicated genes include glutamine synthetase and S-formylglutathione hydrolase (Table S12).  
181 These results suggest that following WGD, specialization of gene expression to distinct  
182 conditions may also be enabled by the streamlining of functions and specialization to symbiosis.



183 In contrast, for their duplicated counterparts, the evolution of greater functional flexibility may  
184 reflect selection during the free-living phase.

### 185 **Partitioned functionality in central metabolic pathways**

186 WGD enables the retention of complete expression networks. Of the 19 inferred co-expression  
187 networks (Table S10), different gene duplication types displayed preferential distributions to  
188 WGCNA modules ( $p < 2.2 \times 10^{-16}$ ,  $\chi^2 = 525.63$ ). Singletons and ohnologs were biased towards  
189 contrasting co-expression networks, with singletons predominantly associated with networks  
190 linked to the symbiotic lifestyle (M1, M8, and M17 in Table S20), and ohnologs with networks  
191 linked to a free-living lifestyle (M2, M5, and M6). This result suggests that genes preferentially  
192 retained as ohnologs were expressed at contrasting times, compared to those that were lost such  
193 that the remaining copies become singletons. Differential expression of ohnologs was observed  
194 at the greatest magnitude between lifestyles during heat stress at 34°C (Chi-square test post-hoc:  
195  $p < 10^{-3}$ , Residuals=4.03; Table S21); this may explain in part how *D. trenchii* can establish itself  
196 or increase in abundance in new hosts both during and after heat waves<sup>34-38</sup>. These contrasting  
197 patterns of singleton and ohnolog membership across co-expression networks indicate a strong  
198 association of ohnolog retention with expression networks that are tightly linked to the free-  
199 living lifestyle.

200 We investigated retention of complete metabolic pathways in both *D. trenchii* isolates. Of the 98  
201 pathways retained in duplicate (Table S22), specialization driven by lifestyle was detected in  
202 central metabolic pathways (Figs S16-S23), such as glycolysis/gluconeogenesis (Fig. 3d and Fig.  
203 S16). Ohnolog specialization in glycolysis/gluconeogenesis reflects the contrasting functions of  
204 this pathway during the symbiotic *versus* free-living phases. That is, a high rate of  
205 gluconeogenesis, inferred using ohnolog expression data, supplies glucose for translocation to

206 the coral host during symbiosis, whereas a high rate of glycolysis fuels the energetic needs of  
207 free-living cells that tolerate more variable environments<sup>3</sup>. Although most enzymes were  
208 encoded by Group 2 ohnologs (for which one gene copy was differentially expressed between  
209 lifestyles; Fig. 3e), a key rate-limiting enzyme of gluconeogenesis and the Calvin cycle, fructose  
210 1,6-bisphosphatase, was differentially expressed in response to heat stress in symbiosis.  
211 Development of minor or partitioned functionality following WGD has been described in  
212 duplicate glycolysis pathways<sup>39</sup>. In yeast, these pathways diverged and became semi-  
213 independent, with each specialized for low and high glucose levels<sup>39</sup>. In *D. trenchii*, this might  
214 allow fine-tuning of carbon metabolism to the contrasting energetic needs of a dual lifestyle.

## 215 **Concluding remarks**

216 Our results provide strong evidence that the dual lifestyle has been a key driver of post-WGD  
217 genome evolution in the dinoflagellate *D. trenchii*. Our working hypothesis is illustrated in Fig.  
218 4. Under the null hypothesis of a solely free-living lifestyle, we expect post-WGD adaptations to  
219 primarily be driven by fluctuating environmental conditions (e.g., nutrient availability). Under  
220 the hypothesis of a dual lifestyle that includes symbiosis, adaptations will also strengthen the  
221 maintenance of a stable host-symbiont relationship, and efficient nutrient/metabolite exchange  
222 within the coral holobiont. Although our results provide stronger support for the free-living  
223 phase as the primary driving force behind post-WGD evolution, both lifestyles impact the  
224 maintenance and expression divergence of ohnologs. These combined selective forces increase  
225 overall fitness in *D. trenchii*, with the greater expression divergence of ohnologs under elevated  
226 temperatures a contributor to the high thermotolerance of this species when it is in symbiosis  
227 with corals<sup>40</sup>. Benefits conferred by WGD to a free-living lifestyle in more-variable  
228 environments, as well as tailoring of post-WGD duplicates to different lifestyles, primed *D.*

229 *trenchii* to persist longer in the coral holobiont when faced with thermal stress. Whether  
230 symbiosis may also have negative effects on fitness post-WGD is unknown<sup>41</sup>. It should be noted  
231 that the dual lifestyle is widespread in Symbiodiniaceae<sup>5</sup>, but WGD is not. Although other  
232 facultative symbionts within Symbiodiniaceae (e.g., *Cladocopium thermophilum*)<sup>42,43</sup> are also  
233 known for their thermotolerance, WGD was not implicated in these lineages<sup>11,44</sup>. Therefore, the  
234 key feature of *D. trenchii* that we are addressing is not dual lifestyle alone, but rather how the  
235 capacity for dynamically switching between the symbiotic *versus* free-living phase impacts post-  
236 WGD genome evolution and adaptation. Because Symbiodiniaceae propagate to very high  
237 densities in coral tissues ( $10^5$ – $10^6$  cells/cm<sup>2</sup>)<sup>45,46</sup>, the symbiotic phase of *D. trenchii* allows a  
238 rapid increase in the population size, particularly of fast-growing genotypes, while resident in  
239 host tissues. Consequently, genotypes that have faster growth rates or greater resilience to heat  
240 due to WGD-derived adaptations can re-seed free-living populations upon dissociation from the  
241 coral due to colony death, bleaching, or other mechanisms of symbiont population control.  
242 Repeated cycles of symbiosis followed by the free-living phase may therefore increase the  
243 overall fitness of *D. trenchii* populations under the dual lifestyle<sup>47</sup>. Retention of multiple gene  
244 copies combined with fixed, adaptive changes likely makes *D. trenchii* more capable of  
245 metabolic maintenance under dynamic, often stressful environments, and hence a more-resilient  
246 symbiont. Such factors may in turn explain the large geographic and expanded host range of *D.*  
247 *trenchii*<sup>24</sup> and its well-known capacity for increasing coral survival under heat waves. Therefore,  
248 in an intriguing and unexpected twist, WGD, primarily driven by selection under a free-living  
249 life phase has converted *D. trenchii* into a coral symbiont able to protect the host coral from  
250 thermal stress during symbiosis. *D. trenchii* is also a valuable model for studying the genome-  
251 wide impacts of facultative lifestyles.

## 252 **Methods**

### 253 ***De novo* genome assembly and prediction of protein-coding genes**

254 *Durusdinium trenchii* strains CCMP2556 and SCF082 (previously designated UTSD amur-D-  
255 MI) originally isolated from an *Orbicella faveolate* and *Acropora muricata* coral colonies,  
256 respectively, were each separately cultured and genomic DNA extracted for genomic sequencing  
257 (see Supplementary Information). Chromium libraries were generated for 10X linked-read  
258 sequencing and yielded a total of 236.45 Gbp for CCMP2556 and 212.03 Gbp for SCF082. We  
259 assessed the ploidy of *D. trenchii* using *k*-mers and GenomeScope2<sup>48</sup>, which revealed a  
260 distinctive single peak in both isolates indicating a haploid genome as seen in other  
261 Symbiodiniaceae (Figure S24), with a predicted heterozygosity of 0.31% and 0.20% in  
262 CCMP2556 and SCF082, respectively.

263 For each isolate, a preliminary draft genome was assembled *de novo* using 10X Genomics  
264 Supernova v2.1.1. For CCMP2556, the estimated genome coverage (~100×) exceeded the  
265 optimal range (38–56×) of the Supernova assembler; we subsampled the 1.6B reads to 600M  
266 reads (~60× coverage). For SCF082, coverage estimates were observed to be impacted due to the  
267 presence of contaminant DNA from microbial sources in the sequencing reads; the *de novo*  
268 assembly was generated using all 1.4B reads with the flag `-accept_extreme_coverage`.

269 Presence of putative contaminant scaffolds in the supernova assemblies was investigated using a  
270 comprehensive approach adapted from Iha *et al.*<sup>49</sup> informed by read coverage, G+C content,  
271 taxonomic designation, and *de novo* transcriptome mapping. Taxon-annotated G+C-coverage  
272 plots (Figure S25) were generated using the BlobTools suite v1.1<sup>50</sup> to identify scaffolds in each  
273 assembly that deviated by read coverage, taxonomic sequence similarity, and/or G+C content.

274 Read coverage was assessed using BWA v0.7.17, based on mapping of quality-trimmed reads  
275 (Longranger v2.2.2<sup>51</sup> ran at default setting) to the genome assembly. The taxonomic identity of  
276 scaffolds was assigned based on BLASTN search ( $E \leq 10^{-20}$ ) against genome sequences from  
277 bacteria, archaea, viruses, and alveolates in the NCBI nt database (release 2021-05-10). *De novo*  
278 transcriptome assemblies were mapped to the genome assemblies using minimap2 v2.18<sup>52</sup> within  
279 which we have modified the codes to account for non-canonical splice sites of dinoflagellates.  
280 Scaffolds that were designated as non-dinoflagellate were removed from the assemblies if they  
281 lacked mapped transcripts from the corresponding *de novo* transcriptome assembly, or when  
282 <10% of mapped transcripts indicate evidence of introns in the genomes. We considered a  
283 scaffold as a putative contaminant if (a) its sequence coverage or G+C content is not within the  
284  $1.5 \times$  interquartile range, and (b) it lacks any transcript support defined above. Upon removal of  
285 these putative contaminant sequences from the CCMP2556 assembly, the filtered assembly was  
286 incorporated in the database as the *D. trenchii* reference for assessing the assembled scaffolds of  
287 SCF082 using the same approach.

288 Publicly available RNA-Seq data from previous studies of CCMP2556<sup>28</sup> and SCF082<sup>53</sup> were  
289 used to further scaffold the assembled genome sequences (see Supplementary Information).  
290 RNA-Seq reads for both isolates were first quality-trimmed using fastp<sup>54</sup> (mean Phred quality  $\geq$   
291 30 across a 4bp window; minimum read length of 50bp). For each isolate, the filtered reads were  
292 assembled *de novo* using Trinity v2.11.0<sup>55</sup> independently for each treatment. The transcriptome  
293 assemblies for CCMP2556 (791,219 total transcripts) and those for SCF082 (355,411 total  
294 transcripts) were mapped to the filtered genome assemblies using minimap2 v2.18<sup>52</sup> that was  
295 modified to recognize the non-canonical splice sites of dinoflagellates. The mapped transcripts

296 were then used to scaffold the filtered genome assemblies with L\_RNA\_Scaffolder<sup>56</sup> at default  
297 parameters.

298 A second round of scaffolding was then performed with ARBitR<sup>57</sup>, which incorporates the  
299 distance information from linked-read sequencing data when merging and scaffolding  
300 assemblies. Longranger BASIC quality-trimmed linked genome reads (outputs from the standard  
301 10X Genomics data workflow) were mapped to the scaffolded genome assemblies for ARBitR  
302 scaffolding, yielding the final genome assemblies: CCMP2556 (assembly size = 1.70 Gb; N50 =  
303 750 Kb; 29,137 scaffolds) and SCF082 (assembly size = 1.64 Gb; N50 = 398.5 Kb; 44,682  
304 scaffolds) (Table S2). The CCMP2556 assembly is the most contiguous reported in  
305 Symbiodiniaceae aside from the recent chromosome-level assemblies for *Symbiodinium*  
306 *microadriaticum*<sup>58</sup> and *Breviolum minutum*<sup>59</sup>.

307 Genome and gene features of dinoflagellates are highly idiosyncratic and atypical of eukaryotes,  
308 due in part to non-canonical splice sites<sup>60</sup>. Therefore, the prediction of protein-coding genes from  
309 dinoflagellate genomes requires a comprehensive workflow  
310 ([https://github.com/TimothyStephens/Dinoflagellate\\_Annotation\\_Workflow/](https://github.com/TimothyStephens/Dinoflagellate_Annotation_Workflow/)) tailored for these  
311 features, guided by high-confidence evidence<sup>61</sup>. Here, we adopted a customised workflow  
312 integrating the results from multiple methods, guided by available transcript and protein  
313 sequences, independently for CCMP2556 and SCF082; see Supplementary Information for  
314 detail.

### 315 **Analysis of whole-genome duplication**

316 We first searched for evidence of collinear gene blocks using MCScanX<sup>62</sup> in intra-species mode  
317 (-b I) to identify putative duplicate gene blocks within each genome (i.e. segmental and/or

318 whole-genome duplication), and in inter-species mode (*-b 2*) to identify syntenic gene blocks  
319 between the two genomes. A collinear block is defined as at least five genes conserved in the  
320 same orientation and order as a result of segmental duplication and/or WGD events. For each  
321 comparison, all-vs-all BLASTP search results were restricted to the top five hits (query or  
322 subject coverage > 50%;  $E \leq 10^{-5}$ ). Predicted genes from each genome were classified using  
323 *duplicate\_gene\_classifier* (within MCScanX) into singleton, dispersed duplicates (i.e. duplicates  
324 separated by >20 genes), proximal duplicates (i.e. duplicates separated by <20 genes), tandem  
325 duplicates, and WGD/segmental duplicates (i.e. ohnologs).

326 Second, we assessed the reconciliation between each gene tree and the species tree; the  
327 topological incongruence between the two trees indicates history of gene duplication or loss<sup>63</sup>  
328 OrthoFinder v2.3.10<sup>64</sup> was first used to infer homologous gene sets among Suessiales species  
329 using BLASTP ( $E$ -value  $\leq 10^{-5}$ ). Multiple sequence alignments were performed with MAFFT  
330 v7.487<sup>65</sup> (*-linsi*), from which phylogenetic trees were inferred using FastTree v2.1.11<sup>66</sup> at default  
331 parameters. Reconciliation of gene-tree and species-tree within OrthoFinder was then used to  
332 identify lineage-specific duplication events; those specific to *D. trenchii* indicative of WGD-  
333 derived duplicated genes (i.e. ohnologs).

334 Third, we assessed the impact of WGD on the rate of synonymous substitution ( $K_s$ ) among all  
335 homologous gene sets, using CCMP2556 as the reference, following the wgd pipeline<sup>67</sup>. Briefly,  
336 homologous protein clusters were inferred using a Markov Clustering algorithm<sup>68</sup> from the  
337 previous all-versus-all BLASTP search (used for MCScanX), and aligned using MAFFT<sup>65</sup>.  
338 Phylogenetic tree for each homologous protein cluster was inferred using FastTree2<sup>66</sup> and used  
339 to estimate  $K_s$  values for each cluster using codeml implemented in PAML<sup>69</sup>. A Gaussian-  
340 mixture model was applied to the  $K_s$  distribution, using a four-component model that provided

341 the best fit for the data according to Akaike information criterion (AIC), yielding a final node-  
342 averaged histogram of  $K_s$  distribution. To estimate the timing of WGD, we first calculated the  
343 estimated substitution rate ( $r$ ) per year in Symbiodiniaceae adapting the approach of Ladner *et*  
344 *al.*<sup>26</sup> to incorporate genome data and the updated divergence time estimates from LaJeunesse *et*  
345 *al.*<sup>5</sup>.

346 We followed Aury *et al.*<sup>20</sup> to infer metabolic pathways that were preferentially retained in  
347 duplicate following WGD using PRIAM v2 (January 2018 release). Briefly, we identified  
348 metabolic enzymes that had been uniquely retained as ohnologs or singletons. We then compared  
349 the proportion of enzymes uniquely retained as ohnologs to singletons, to the background  
350 proportion of the number of ohnologs and singletons annotated in the genome. This tests whether  
351 the number of uniquely retained metabolic enzymes for a particular pathway exceeds the  
352 background levels that would be expected to occur by random. We additionally required (a) five  
353 or more distinct enzymatic proteins to be identified as uniquely retained in either duplicate or  
354 singleton, and (b) pathways to be significantly overrepresented in both isolates. The proportion  
355 of enzymes coded by genes that were uniquely retained as ohnologs or singletons, compared to  
356 their overall proportions in the genome, was used to determine which KEGG pathways were  
357 preferentially retained in duplicate following WGD.

### 358 **Evolution of ohnolog expression**

359 Trimmed RNA-Seq reads (above) were mapped to the corresponding genome using HISAT2  
360 v2.2.1 (*--concordant-only*) with a Hierarchical Graph FM index informed by annotated exon and  
361 splice sites. Counts of uniquely mapped paired-end (PE) reads overlapping with CDS regions  
362 were then enumerated using *featureCounts* (*-p --countReadPairs --B -C*) implemented in  
363 Subread v0.2.3<sup>70</sup>. The raw counts were filtered to remove lowly expressed genes using the



364 *filtrByExpr* function in edgeR. Differential gene expression analysis was performed with edgeR  
365 using a generalized linear model. We considered genes to be differentially expressed when false  
366 discovery rate (FDR) < 0.01 and the absolute value of  $\log_2(\text{fold-change}) > 1$ . We compared the  
367 difference between lifestyles at two temperatures, i.e. symbiosis *versus* free-living at 34°C (L-  
368 34), and symbiosis *versus* free-living at 28°C (L-28), and the response to temperature stress in  
369 the two lifestyles, i.e. 34°C *versus* 28°C at free-living (T-Fr), and 34°C *versus* 28°C in symbiosis  
370 (T-Sy).

371 A weighted gene co-expression network analysis (WGCNA) was performed on all genes in R  
372 using the WGCNA package. Variance of normalised counts were calculated using the standard  
373 DESeq2 workflow followed by its *varianceStabilizingTransformation*. Because symbiosis is a  
374 strong driver of expression in Symbiodiniaceae, using the inferred soft-thresholding power for  
375 reducing noise and setting a required threshold for gene correlations would have yielded a mean  
376 connectivity of over 4,000 at the inferred power of 6. Therefore, a weighted, unidirectional co-  
377 expression network was inferred using a power of 18, the recommended value for signed  
378 networks with less than 20 samples. Co-expression modules were inferred using the function  
379 *blockwiseModules* that collectively infers signed networks (networkType="signed",  
380 TOMtype="signed", maxBlockSize=10000, corType="bicor", maxPoutliers=0.05,  
381 pearsonFallback="individual", deepSplit=2, dcuth=0.999, minModuleSize=30,  
382 reassignThreshold=0.1, cutHeight=0.2).

383

384 We calculated the adjacencies using a signed network with *bicor* robust correlation coefficient  
385 (power=18, type="signed", corFnc=bicor, maxPoutliers=0.1, pearsonFallback="individual"). A

386 topological association matrix was then inferred with a signed network and *dissTOM* computed  
387 from the product. A hierarchical dendrogram of genes was inferred using *hclust*  
388 (method="average"). The dendrogram was cut using *cutreeDynamic* (deepSplit=2,  
389 minClusterSize=15, cutHeight=0.999) and the cut dendrogram merged with *mergeCloseModules*  
390 (cutHeight=0.15, corFnc=bicor, maxPoutliers=0.1, pearsonFallback="individual"). Preferential  
391 distribution of the different gene duplication categories to WGCNA modules was assessed with a  
392 chi-square test and a post hoc analysis performed with the R package *chisq.posthoc.test*  
393 (<https://github.com/ebbertd/chisq.posthoc.test.git>).

394 Expression specificity of ohnologs was assessed using the tau ( $\tau$ ) index<sup>29</sup>, where  $\tau = 1$  indicates  
395 highly specific expression, and  $\tau = 0$  indicates broad expression. The log-normalised fragments  
396 per kilobase million (FPKM) counts were used to calculate  $\tau$  index scores for those genes with a  
397  $\log_2(\text{FPKM} + 1) > 1$  in at least one condition following Yanai *et al.*<sup>29</sup>. The  $\tau$  indices for the  
398 different MCSanX duplication categories were compared using a Kruskal-Wallis rank sum test;  
399 pairwise comparisons using Wilcoxon rank sum test with continuity correction and holm *p*-value  
400 adjustment were performed to determine differences between the duplication categories. A chi-  
401 square test of all significant  $\tau$  indices ( $\tau \geq 0.7$ ) was conducted to assess potential biases in  
402 expression specificity for treatments among the duplication categories.

### 403 **Analysis of post-transcriptional regulation**

404 All-versus-all BLASTN search (query or subject coverage  $> 50\%$ ;  $E \leq 10^{-20}$ ) was used to  
405 identify shared exonic sequences that have been retained since WGD. For inferring differential  
406 exon usage (DEU) within genes among the treatment conditions, gene models were first broken  
407 up into exon "counting bins" using the Python script *dexseq\_prepare\_annotation.py* from  
408 DEXSeq. The relative usage of each exon bin, i.e. the number of transcripts mapping to the bin

409 or to the gene, was then calculated from the HISAT2 BAM file using *dexseq\_count.py*. The  
410 DEXSeq R package was then used to infer differential exon usage within genes using a  
411 generalised linear model, correcting for significance at the gene level using the Benjamini-  
412 Hochberg method<sup>71</sup>.

413 To examine the conservation of splice junctions in ohnolog pairs, all *de novo* assembled  
414 transcripts were first aligned to the genome using a minimap2 v2.20<sup>52</sup> with code modified to  
415 recognize alternative splice sites in dinoflagellates, from which splice sites were identified and  
416 annotated using PASA<sup>72</sup>. Splice sites categorized as alternative acceptor, alternative donor,  
417 alternative exon, retained exon, and skipped exon were retained for subsequent analysis. Each  
418 identified splice event was assigned two unique identifiers to represent the upstream and  
419 downstream positions of the splice event, along with its gene identifier and genomic location.  
420 The upstream and downstream 300bp-region for each splice event were then extracted using the  
421 bedtools v2.30 *flank* and *getfasta* functions. An all-versus-all BLASTN search of the extracted  
422 splice junction sequences was used to identify sequence similarity ( $E \leq 10^{-5}$ ) between the  
423 sequences. Custom Python scripts were used to filter the BLASTN results to identify conserved  
424 splice junctions, in which both upstream and downstream regions for a splice event in two  
425 ohnologs were significantly similar ( $E \leq 10^{-5}$ ). The splice junction profile for each ohnolog pair  
426 was then converted to a binary representation, where the presence of a splice junction in an  
427 ohnolog was represented as 1 and the absence of a splice junction represented as 0 (i.e.,  
428 conserved splice junctions represented as 1 in both ohnologs compared to 0 for those that were  
429 not conserved). A Kendall's rank correlation was then conducted in R to identify ohnolog pairs  
430 that exhibited high level of conservation in splice junctions. An exact binomial test was also

431 performed to identify ohnolog pairs that had diverged in terms of total splice junctions ( $p <$   
432 0.05).

### 433 **Data availability**

434 The genome data generated from this study for the two *D. trenchii* isolates are available at NCBI  
435 through BioProject accession PRJEB66001. The assembled genomes, predicted gene models,  
436 and proteins for *D. trenchii* CCMP2556 and SCF082 are available  
437 at <https://doi.org/10.48610/27da3e7>.

### 438 **References**

- 439 1 Rowan, R. Thermal adaptation in reef coral symbionts. *Nature* **430**, 742 (2004).
- 440 2 Berkelmans, R. & van Oppen, M. J. H. The role of zooxanthellae in the thermal tolerance  
441 of corals: a ‘nugget of hope’ for coral reefs in an era of climate change. *Proc. R. Soc. B*  
442 **273**, 2305-2312 (2006).
- 443 3 González-Pech, R. A., Bhattacharya, D., Ragan, M. A. & Chan, C. X. Genome evolution of  
444 coral reef symbionts as intracellular residents. *Trends in Ecology & Evolution* **34**, 799-806  
445 (2019).
- 446 4 Pettay, D. T. & Lajeunesse, T. C. Microsatellite loci for assessing genetic diversity,  
447 dispersal and clonality of coral symbionts in ‘stress-tolerant’ clade D *Symbiodinium*. *Mol.*  
448 *Ecol. Resour.* **9**, 1022-1025 (2009).
- 449 5 LaJeunesse, T. C. *et al.* Systematic revision of Symbiodiniaceae highlights the antiquity  
450 and diversity of coral endosymbionts. *Curr. Biol.* **28**, 2570-2580 (2018).
- 451 6 Rådecker, N. *et al.* Heat stress destabilizes symbiotic nutrient cycling in corals. *Proc. Natl.*  
452 *Acad. Sci. U. S. A.* **118**, e2022653118 (2021).
- 453 7 Xiang, T. *et al.* Symbiont population control by host-symbiont metabolic interaction in  
454 Symbiodiniaceae-cnidarian associations. *Nat. Commun.* **11**, 108 (2020).
- 455 8 LaJeunesse, T. C. *et al.* Revival of *Philozoon* Geddes for host-specialized dinoflagellates,  
456 ‘Zooxanthellae’, in animals from coastal temperate zones of Northern and Southern  
457 Hemispheres. *Eur. J. Phycol.*, 1-15 (2021).
- 458 9 Pochon, X. & LaJeunesse, T. C. *Miliolidium* n. gen, a new symbiodiniacean genus whose  
459 members associate with soritid foraminifera or are free-living. *J. Eukaryot. Microbiol.* **68**,  
460 e12856 (2021).

- 461 10 Nitschke, M. R. *et al.* Description of *Freudenthalidium* gen. nov. and *Halluxium* gen. nov.  
462 to formally recognize clades Fr3 and H as genera in the family Symbiodiniaceae  
463 (Dinophyceae). *J. Phycol.* **56**, 923-940 (2020).
- 464 11 González-Pech, R. A. *et al.* Comparison of 15 dinoflagellate genomes reveals extensive  
465 sequence and structural divergence in family Symbiodiniaceae and genus *Symbiodinium*.  
466 *BMC Biol.* **19**, 73 (2021).
- 467 12 Van de Peer, Y., Maere, S. & Meyer, A. The evolutionary significance of ancient genome  
468 duplications. *Nat. Rev. Genet.* **10**, 725-732 (2009).
- 469 13 Schranz, M. E., Mohammadin, S. & Edger, P. P. Ancient whole genome duplications,  
470 novelty and diversification: the WGD Radiation Lag-Time Model. *Curr. Opin. Plant Biol.*  
471 **15**, 147-153 (2012).
- 472 14 Conant, G. C. & Wolfe, K. H. Turning a hobby into a job: how duplicated genes find new  
473 functions. *Nat. Rev. Genet.* **9**, 938-950 (2008).
- 474 15 Ohno, S., Wolf, U. & Atkin, N. B. Evolution from fish to mammals by gene duplication.  
475 *Hereditas* **59**, 169-187 (1968).
- 476 16 Singh, P. P., Arora, J. & Isambert, H. Identification of ohnolog genes originating from  
477 whole genome duplication in early vertebrates, based on synteny comparison across  
478 multiple genomes. *PLoS Comput. Biol.* **11**, e1004394 (2015).
- 479 17 Kellis, M., Birren, B. W. & Lander, E. S. Proof and evolutionary analysis of ancient  
480 genome duplication in the yeast *Saccharomyces cerevisiae*. *Nature* **428**, 617-624 (2004).
- 481 18 Gallone, B. *et al.* Domestication and divergence of *Saccharomyces cerevisiae* beer yeasts.  
482 *Cell* **166**, 1397-1410 (2016).
- 483 19 Peter, J. *et al.* Genome evolution across 1,011 *Saccharomyces cerevisiae* isolates. *Nature*  
484 **556**, 339-344 (2018).
- 485 20 Aury, J.-M. *et al.* Global trends of whole-genome duplications revealed by the ciliate  
486 *Paramecium tetraurelia*. *Nature* **444**, 171-178 (2006).
- 487 21 McGrath, C. L., Gout, J.-F., Doak, T. G., Yanagi, A. & Lynch, M. Insights into three  
488 whole-genome duplications gleaned from the *Paramecium caudatum* genome sequence.  
489 *Genetics* **197**, 1417-1428 (2014).
- 490 22 Maeda, Y. *et al.* Chromosome-scale genome assembly of the marine oleaginous diatom  
491 *Fistulifera solaris*. *Mar. Biotechnol.* **24**, 788-800 (2022).
- 492 23 Tanaka, T. *et al.* Oil accumulation by the oleaginous diatom *Fistulifera solaris* as revealed  
493 by the genome and transcriptome. *Plant Cell* **27**, 162-176 (2015).

- 494 24 Pettay, D. T., Wham, D. C., Smith, R. T., Iglesias-Prieto, R. & LaJeunesse, T. C. Microbial  
495 invasion of the Caribbean by an Indo-Pacific coral zooxanthella. *Proc. Natl. Acad. Sci. U.*  
496 *S. A.* **112**, 7513-7518 (2015).
- 497 25 Tiley, G. P., Barker, M. S. & Burleigh, J. G. Assessing the performance of Ks plots for  
498 detecting ancient whole genome duplications. *Genome Biol. Evol.* **10**, 2882-2898 (2018).
- 499 26 Ladner, J. T., Barshis, D. J. & Palumbi, S. R. Protein evolution in two co-occurring types  
500 of *Symbiodinium*: an exploration into the genetic basis of thermal tolerance in  
501 *Symbiodinium* clade D. *BMC Evol. Biol.* **12**, 217 (2012).
- 502 27 Voris, H. K. Maps of Pleistocene sea levels in Southeast Asia: shorelines, river systems  
503 and time durations. *J. Biogeogr.* **27**, 1153-1167 (2000).
- 504 28 Bellantuono, A. J., Dougan, K. E., Granados-Cifuentes, C. & Rodriguez-Lanetty, M. Free-  
505 living and symbiotic lifestyles of a thermotolerant coral endosymbiont display profoundly  
506 distinct transcriptomes under both stable and heat stress conditions. *Mol. Ecol.* **28**, 5265-  
507 5281 (2019).
- 508 29 Yanai, I. *et al.* Genome-wide midrange transcription profiles reveal expression level  
509 relationships in human tissue specification. *Bioinformatics* **21**, 650-659 (2005).
- 510 30 Prince, V. E. & Pickett, F. B. Splitting pairs: the diverging fates of duplicated genes. *Nat.*  
511 *Rev. Genet.* **3**, 827-837 (2002).
- 512 31 Lehner, B. Conflict between noise and plasticity in yeast. *PLoS Genet.* **6**, e1001185 (2010).
- 513 32 Matthews, J. L. *et al.* Partner switching and metabolic flux in a model cnidarian-  
514 dinoflagellate symbiosis. *Proc. R. Soc. B* **285** (2018).
- 515 33 Yuyama, I., Ishikawa, M., Nozawa, M., Yoshida, M.-a. & Ikeo, K. Transcriptomic changes  
516 with increasing algal symbiont reveal the detailed process underlying establishment of  
517 coral-algal symbiosis. *Sci. Rep.* **8**, 16802 (2018).
- 518 34 Silverstein, R. N., Cunning, R. & Baker, A. C. Tenacious D: *Symbiodinium* in clade D  
519 remain in reef corals at both high and low temperature extremes despite impairment. *J.*  
520 *Exp. Biol.* **220**, 1192-1196 (2017).
- 521 35 Claar, D. C. *et al.* Dynamic symbioses reveal pathways to coral survival through prolonged  
522 heatwaves. *Nat. Commun.* **11**, 6097 (2020).
- 523 36 Abrego, D., Willis, B. L. & van Oppen, M. J. Impact of light and temperature on the uptake  
524 of algal symbionts by coral juveniles. *PLoS ONE* **7**, e50311 (2012).
- 525 37 Herrera, M. *et al.* Temperature transcends partner specificity in the symbiosis  
526 establishment of a cnidarian. *ISME J.* **15**, 141-153 (2021).

- 527 38 Matsuda, S. B. *et al.* Temperature-mediated acquisition of rare heterologous symbionts  
528 promotes survival of coral larvae under ocean warming. *Glob. Chang. Biol.* **28**, 2006-2025  
529 (2022).
- 530 39 Conant, G. C. & Wolfe, K. H. Functional partitioning of yeast co-expression networks after  
531 genome duplication. *PLoS Biol.* **4**, e109 (2006).
- 532 40 Chakravarti, L. J. & van Oppen, M. J. Experimental evolution in coral photosymbionts as a  
533 tool to increase thermal tolerance. *Front. Mar. Sci.* **5**, 227 (2018).
- 534 41 Carretero-Paulet, L. & Van de Peer, Y. The evolutionary conundrum of whole-genome  
535 duplication. *Am. J. Bot.* **107**, 1101 (2020).
- 536 42 Howells, E. J. *et al.* Corals in the hottest reefs in the world exhibit symbiont fidelity not  
537 flexibility. *Mol. Ecol.* **29**, 899-911 (2020).
- 538 43 Hume, B. C. *et al.* *Symbiodinium thermophilum* sp. nov., a thermotolerant symbiotic alga  
539 prevalent in corals of the world's hottest sea, the Persian/Arabian Gulf. *Sci. Rep.* **5**, 8562  
540 (2015).
- 541 44 Dougan, K. E. *et al.* Genome-powered classification of microbial eukaryotes: focus on  
542 coral algal symbionts. *Trends Microbiol.* **30**, 831-840 (2022).
- 543 45 Drew, E. A. The biology and physiology of alga-invertebrates symbioses. II. The density of  
544 symbiotic algal cells in a number of hermatypic hard corals and alcyonarians from various  
545 depths. *J. Exp. Mar. Biol. Ecol.* **9**, 71-75 (1972).
- 546 46 Porter, J. W., Muscatine, L., Dubinsky, Z. & Falkowski, P. G. Primary production and  
547 photoadaptation in light- and shade-adapted colonies of the symbiotic coral, *Stylophora*  
548 *pistillata*. *Proc. R. Soc. B* **222**, 161-180 (1984).
- 549 47 Bhattacharya, D., Stephens, T. G., Chille, E. E., Benites, L. F. & Chan, C. X. Facultative  
550 lifestyle drives diversity of coral algal symbionts. *Trends Ecol. Evol.*, accepted; in press  
551 (2024).
- 552 48 Ranallo-Benavidez, T. R., Jaron, K. S. & Schatz, M. C. GenomeScope 2.0 and Smudgeplot  
553 for reference-free profiling of polyploid genomes. *Nat. Commun.* **11**, 1432 (2020).
- 554 49 Iha, C. *et al.* Genomic adaptations to an endolithic lifestyle in the coral-associated alga  
555 *Ostreobium*. *Curr. Biol.* **31**, 1393-1402 (2021).
- 556 50 Laetsch, D. R. & Blaxter, M. L. BlobTools: Interrogation of genome assemblies.  
557 *F1000Res.* **6**, 1287-1287 (2017).
- 558 51 Marks, P. *et al.* Resolving the full spectrum of human genome variation using linked-reads.  
559 *Genome Res.* **29**, 635-645 (2019).

- 560 52 Li, H. Minimap2: pairwise alignment for nucleotide sequences. *Bioinformatics* **34**, 3094-  
561 3100 (2018).
- 562 53 Camp, E. F. *et al.* Proteome metabolome and transcriptome data for three Symbiodiniaceae  
563 under ambient and heat stress conditions. *Sci. Data* **9**, 153 (2022).
- 564 54 Chen, S., Zhou, Y., Chen, Y. & Gu, J. fastp: an ultra-fast all-in-one FASTQ preprocessor.  
565 *Bioinformatics* **34**, i884-i890 (2018).
- 566 55 Haas, B. J. *et al.* De novo transcript sequence reconstruction from RNA-seq using the  
567 Trinity platform for reference generation and analysis. *Nat. Protoc.* **8**, 1494-1512 (2013).
- 568 56 Xue, W. *et al.* L\_RNA\_scaffolder: scaffolding genomes with transcripts. *BMC Genomics*  
569 **14**, 604 (2013).
- 570 57 Hiltunen, M., Ryberg, M. & Johannesson, H. ARBitR: an overlap-aware genome assembly  
571 scaffolder for linked reads. *Bioinformatics* **37**, 2203-2205 (2021).
- 572 58 Nand, A. *et al.* Genetic and spatial organization of the unusual chromosomes of the  
573 dinoflagellate *Symbiodinium microadriaticum*. *Nat. Genet.* **53**, 618-629 (2021).
- 574 59 Marinov, G. K. *et al.* Transcription-dependent domain-scale three-dimensional genome  
575 organization in the dinoflagellate *Breviolum minutum*. *Nat. Genet.* **53**, 613-617 (2021).
- 576 60 Wisecaver, J. H. & Hackett, J. D. Dinoflagellate genome evolution. *Annu. Rev. Microbiol.*  
577 **65**, 369-387 (2011).
- 578 61 Chen, Y., González-Pech, R. A., Stephens, T. G., Bhattacharya, D. & Chan, C. X.  
579 Evidence that inconsistent gene prediction can mislead analysis of dinoflagellate genomes.  
580 *J. Phycol.* **56**, 6-10 (2020).
- 581 62 Wang, Y. *et al.* MCScanX: a toolkit for detection and evolutionary analysis of gene  
582 synteny and collinearity. *Nucleic Acids Res.* **40**, e49 (2012).
- 583 63 Goodman, M., Czelusniak, J., Moore, G. W., Romero-Herrera, A. E. & Matsuda, G. Fitting  
584 the gene lineage into its species lineage, a parsimony strategy illustrated by cladograms  
585 constructed from globin sequences. *Syst. Biol.* **28**, 132-163 (1979).
- 586 64 Emms, D. M. & Kelly, S. OrthoFinder: phylogenetic orthology inference for comparative  
587 genomics. *Genome Biol.* **20**, 238 (2019).
- 588 65 Katoh, K. & Standley, D. M. MAFFT multiple sequence alignment software version 7:  
589 improvements in performance and usability. *Mol. Biol. Evol.* **30**, 772-780 (2013).
- 590 66 Price, M. N., Dehal, P. S. & Arkin, A. P. FastTree 2—approximately maximum-likelihood  
591 trees for large alignments. *PLoS ONE* **5**, e9490 (2010).



- 592 67 Zwaenepoel, A. & Van de Peer, Y. wgd—simple command line tools for the analysis of  
593 ancient whole-genome duplications. *Bioinformatics* **35**, 2153-2155 (2019).
- 594 68 Enright, A. J., Van Dongen, S. & Ouzounis, C. A. Graph clustering by flow simulation.  
595 *Nucleic Acids Res.* **30**, 1575-1584 (2000).
- 596 69 Yang, Z. PAML 4: phylogenetic analysis by maximum likelihood. *Mol. Biol. Evol.* **24**,  
597 1586-1591 (2007).
- 598 70 Liao, Y., Smyth, G. K. & Shi, W. featureCounts: an efficient general purpose program for  
599 assigning sequence reads to genomic features. *Bioinformatics* **30**, 923-930 (2014).
- 600 71 Benjamini, Y. & Hochberg, Y. Controlling the false discovery rate: a practical and  
601 powerful approach to multiple testing. *J. R. Stat. Soc. Ser. B* **57**, 289-300 (1995).
- 602 72 Haas, B. J. *et al.* Automated eukaryotic gene structure annotation using EvidenceModeler  
603 and the Program to Assemble Spliced Alignments. *Genome Biol.* **9**, R7 (2008).

604

## 605 **Acknowledgements**

606 This Project was supported by funding from the Australian Research Council grants  
607 DP190102474 awarded to C.X.C. and D.B. and FL180100036 to M.J.H.v.O., the Australian  
608 Academy of Science Thomas Davies Grant for Marine, Soil, and Plant Biology awarded to  
609 C.X.C., the National Science Foundation grant CAREER1453519 awarded to M.R.L., the City  
610 University of New York grant PSC-CUNY 69757-0047 awarded to C.G.C., the National Institute  
611 of Food and Agriculture-US Department of Agriculture Hatch grant NJ01180 awarded to D.B.,  
612 and funding from the University of Technology Sydney to T.K. and D.J.S. This project is also  
613 supported by computational resources of the National Computational Infrastructure (NCI)  
614 National Facility systems through the NCI Merit Allocation Scheme (Project d85) awarded to  
615 C.X.C. We thank Brian Kemish and David Green for their technical assistance during genome  
616 assembly as well as Joel Burke and Michelle Havlik for technical assistance with the algal  
617 cultures.

618 **Author contributions**

619 K.E.D., A.J.B., D.J.S., C.X.C., and M.R.L. conceptualized the study; K.E.D., D.B., and C.X.C.  
620 drafted the initial manuscript with A.J.B., M.J.H.v.O., D.J.S., and M.R.L. helped finalize the  
621 text; A.J.B. and R.M.A. maintained the cultures and extracted genomic DNA samples; K.E.D.  
622 performed all bioinformatic analyses except for the analyses on RNA editing and organellar  
623 genomes done by Y.C. and S.S., respectively. Y.C. performed RNA editing analysis and S.S.  
624 organellar genome analysis. All authors read and approved the manuscript.

625 **Competing interests**

626 The authors declare no competing interests.

627

628 **Figure legends**

629 **Figure 1. WGD in a facultative coral endosymbiont.** (a) Microscopic images of a free-living  
630 *D. trenchii* cell and a *Exaiptasia pallida* anemone hosting *D. trenchii* under fluorescence, with  
631 red indicating the presence of *D. trenchii*. (b) Repeat landscapes shown separately for the  
632 CCMP2556 and SCF082 genomes. (c) Circle plot depicting the location of syntenic blocks  
633 containing collinear gene blocks (i.e. ohnologs) between the CCMP2556 and SCF082 genomes.  
634 Ribbons indicate syntenic gene blocks identified with MCScanX that overlap with putative  
635 WGD-duplicated regions in both isolates (blue; n=2,427), one isolate only (red; n=612), or  
636 neither isolate (black; n=35). (d) The percentage of genes in duplicated collinear gene blocks  
637 relative to the number of duplicated collinear gene blocks identified within the genomes of  
638 Suessiales species. (e) Number of genes and syntenic genes recovered for each gene duplication  
639 category for the two isolates. (f) Phylogenetic tree of Order Suessiales showing the number of  
640 lineage-specific gene-family duplications at each node.

641 **Figure 2. Ohnolog expression post-WGD.** (a) Three-dimensional scatterplot of the five groups  
642 of ohnologs pairs based on their pattern of differential expression (DE), i.e. pairs for which:  
643 neither gene showed DE (Group 1; blue); only one showed DE (Group 2; orange); both ohnologs  
644 showed DE at the same time in the same manner (Group 3; green); both ohnologs showed DE  
645 but at different times (Group 4; purple); and both ohnologs showed DE at the same time but in  
646 opposing directions (Group 5; red). (b) Pearson correlation coefficients showing correlation of  
647 expression patterns between each ohnolog pair within each of the five groups. (c) Exon gain/loss  
648 between each ohnologs pair within each of the five groups. Heatmaps depicting the normalized  
649 gene expression (z-score) for (d) Group 2 and (e) Group 5.

650 **Figure 3. Exon reorganization underlies functional divergence.** (a) Three-dimensional  
651 scatterplot depicting directionality of DEU among ohnologs pairs of Group 2 and Group 5, which  
652 reflects the pattern of gene-level DEU. The *z*-axis shows the absolute change in DEU (i.e. overall  
653 DEU) within each ohnolog pair from Groups 2 and 5, the *x*-axis shows the relative change in DEU  
654 (i.e. proportion of DEU), and the *y*-axis indicates Pearson correlation coefficient of the gene  
655 expression. An ohnolog-pair from Group 2 with (b) DEU in the ohnolog with gene-level DEU, and  
656 (c) no DEU in its counterpart. (d) Glycolysis and gluconeogenesis pathways for which genes  
657 indicated in red were implicated by differentially expressed ohnologs, and an asterisk indicating rate-  
658 limiting or key enzymes. (e) The  $\log_2(\text{fold-change})$  in expression of differentially expressed ohnologs  
659 across distinct comparison of growth conditions with their corresponding scenario indicated on the  
660 right.

661 **Figure 4. Model of post-WGD divergence in a facultative endosymbiont.** Putative selective  
662 constraints faced by free-living and symbiotic Symbiodiniaceae under the dual lifestyle are  
663 shown, with a focus on post-WGD ohnolog sequence divergence and differential gene  
664 expression.

### 665 **List of supplementary materials**

666 Supplementary Information

667 Figs. S1-S25

668 Tables S1-S22

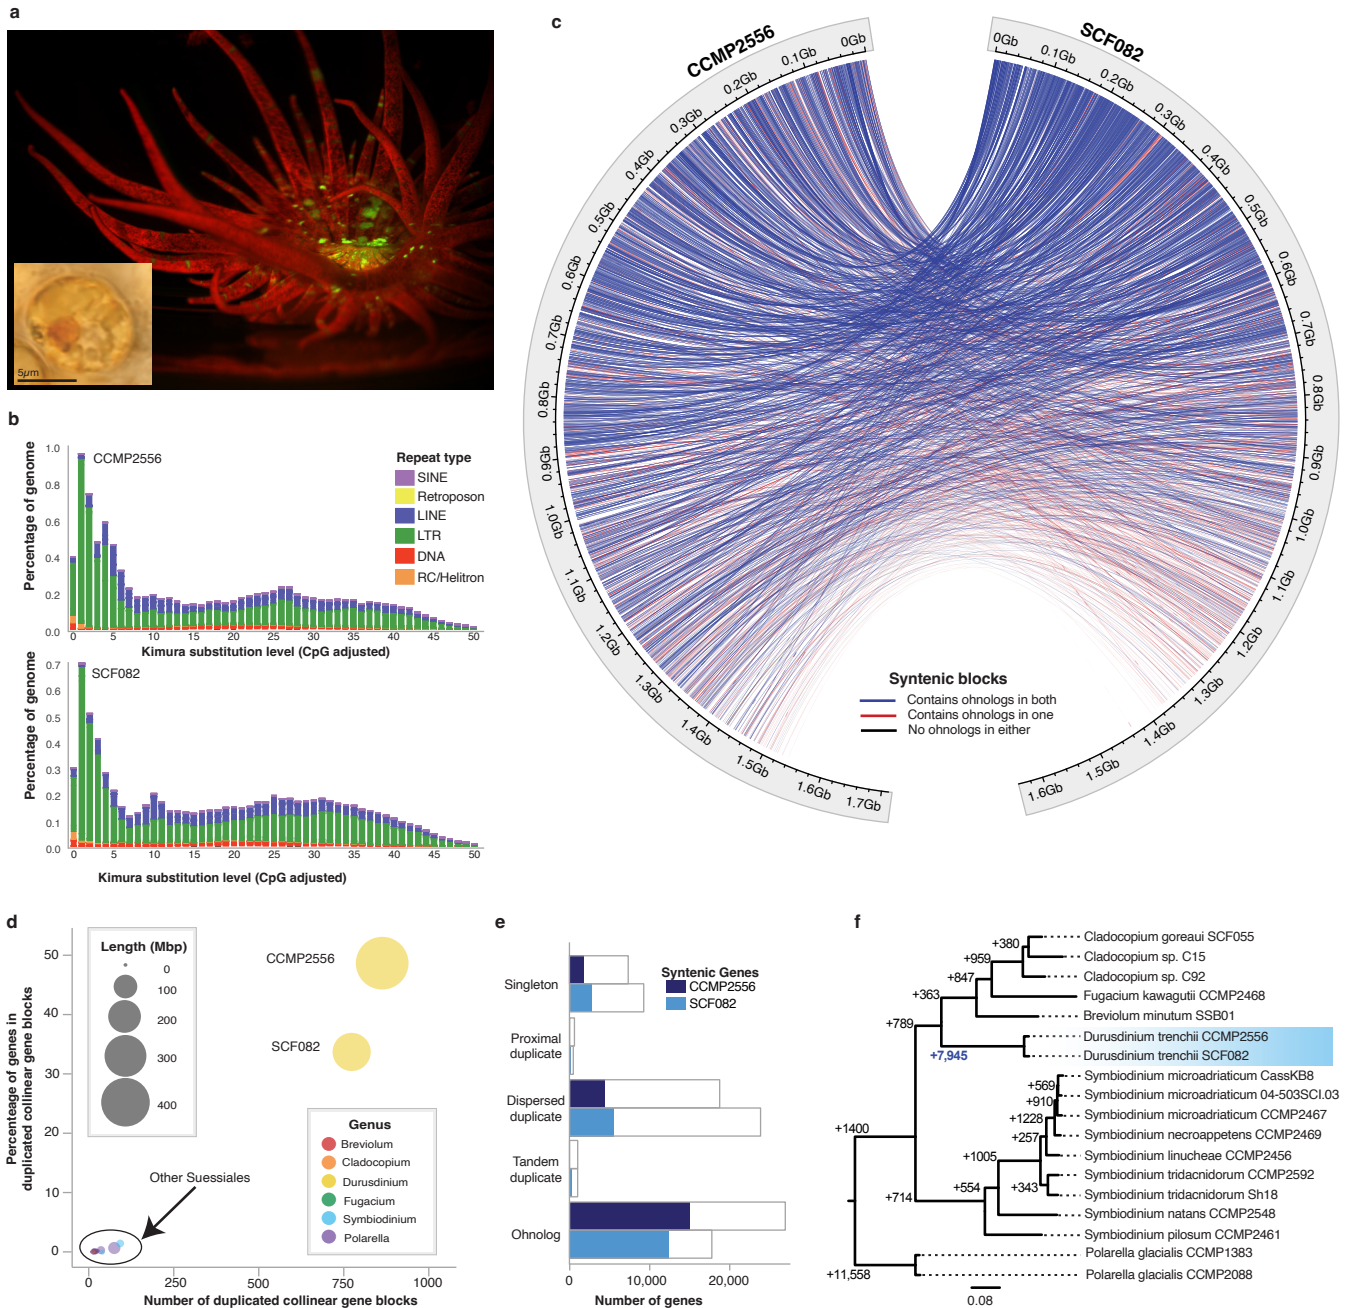

**Figure 1. WGD in a facultative coral endosymbiont.** (a) Microscopic images of a free-living *D. trenchii* cell and a *Exaiptasia pallida* anemone hosting *D. trenchii* under fluorescence, with red indicating the presence of *D. trenchii*. (b) Repeat landscapes shown separately for the CCMP2556 and SCF082 genomes. (c) Circle plot depicting the location of syntenic blocks containing collinear gene blocks (i.e. ohnologs) between the CCMP2556 and SCF082 genomes. Ribbons indicate syntenic gene blocks identified with MCSanX that overlap with putative WGD-duplicated regions in both isolates (blue; n=2,427), one isolate only (red; n=612), or neither isolate (black; n=35). (d) The percentage of genes in duplicated collinear gene blocks relative to the number of duplicated collinear gene blocks identified within the genomes of Suessiales species. (e) Number of genes and syntenic genes recovered for each gene duplication category for the two isolates. (f) Phylogenetic tree of Order Suessiales showing the number of lineage-specific gene-family duplications at each node.

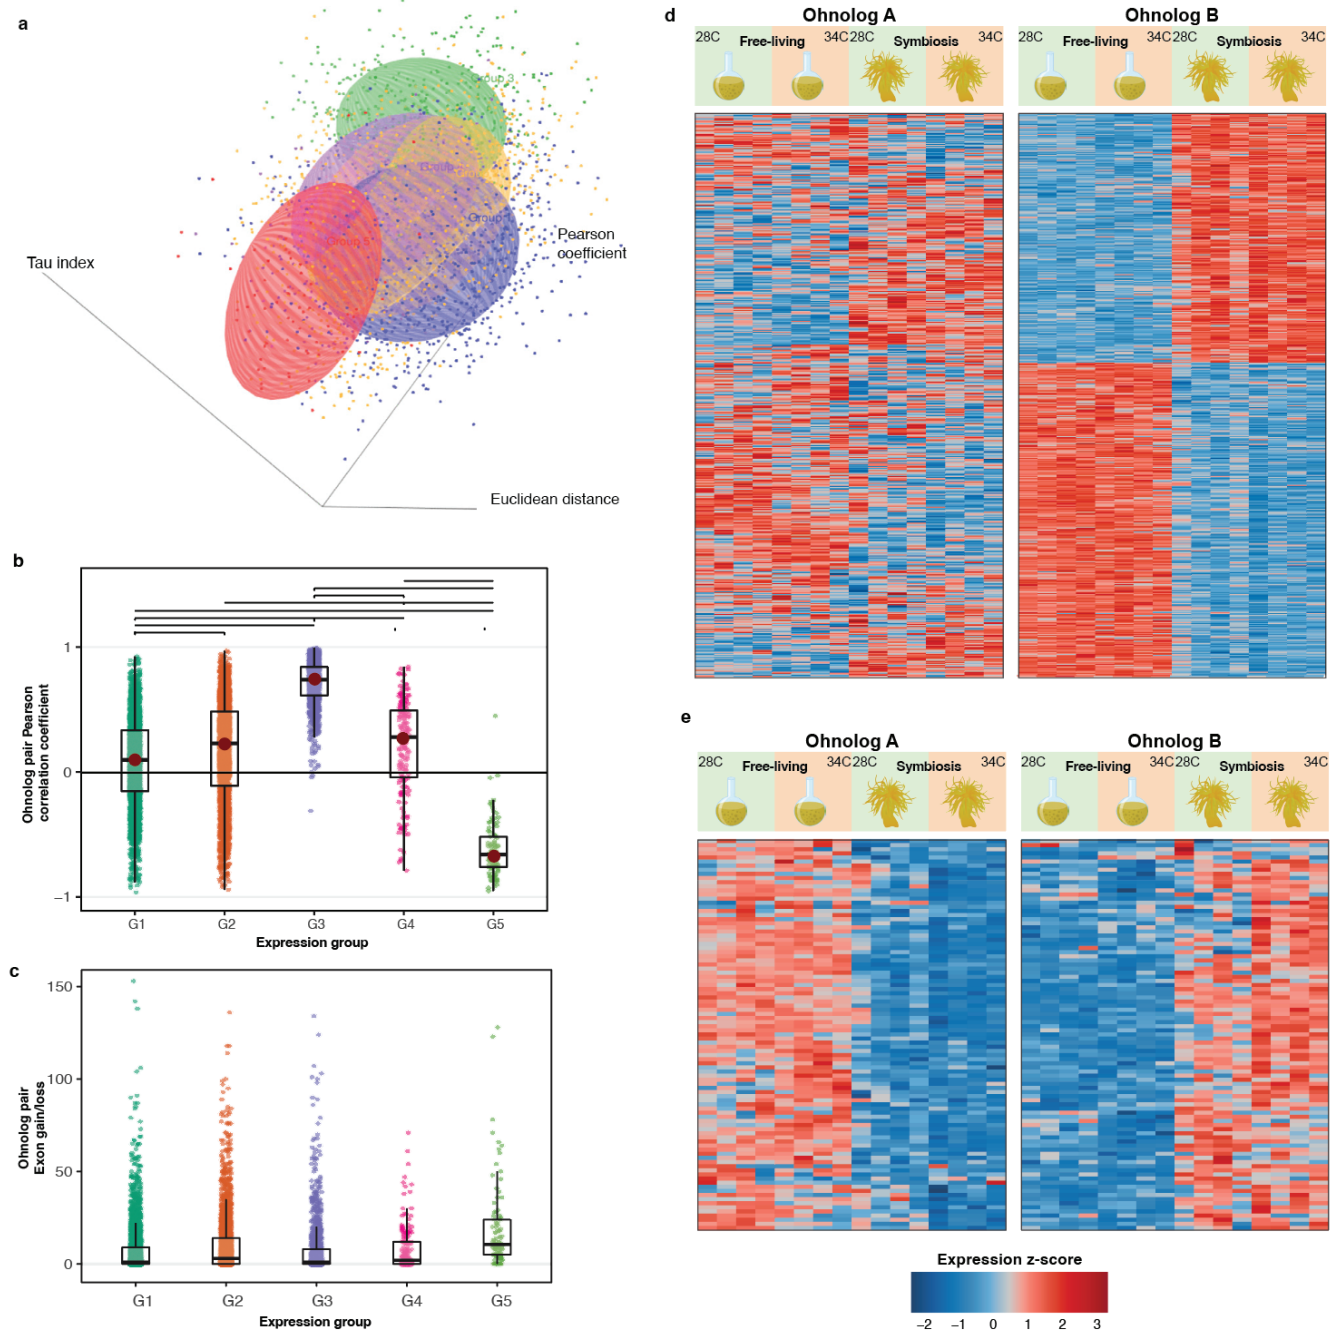

**Figure 2. Ohnolog expression post-WGD.** (a) Three-dimensional scatterplot of the five groups of ohnologs pairs based on their pattern of differential expression (DE), i.e. pairs for which: neither gene showed DE (Group 1; blue); only one showed DE (Group 2; orange); both ohnologs showed DE at the same time in the same manner (Group 3; green); both ohnologs showed DE but at different times (Group 4; purple); and both ohnologs showed DE at the same time but in opposing directions (Group 5; red). (b) Pearson correlation coefficients showing correlation of expression patterns between each ohnolog pair within each of the five groups. (c) Exon gain/loss between each ohnologs pair within each of the five groups. Heatmaps depicting the normalized gene expression (z-score) for (d) Group 2 and (e) Group 5.

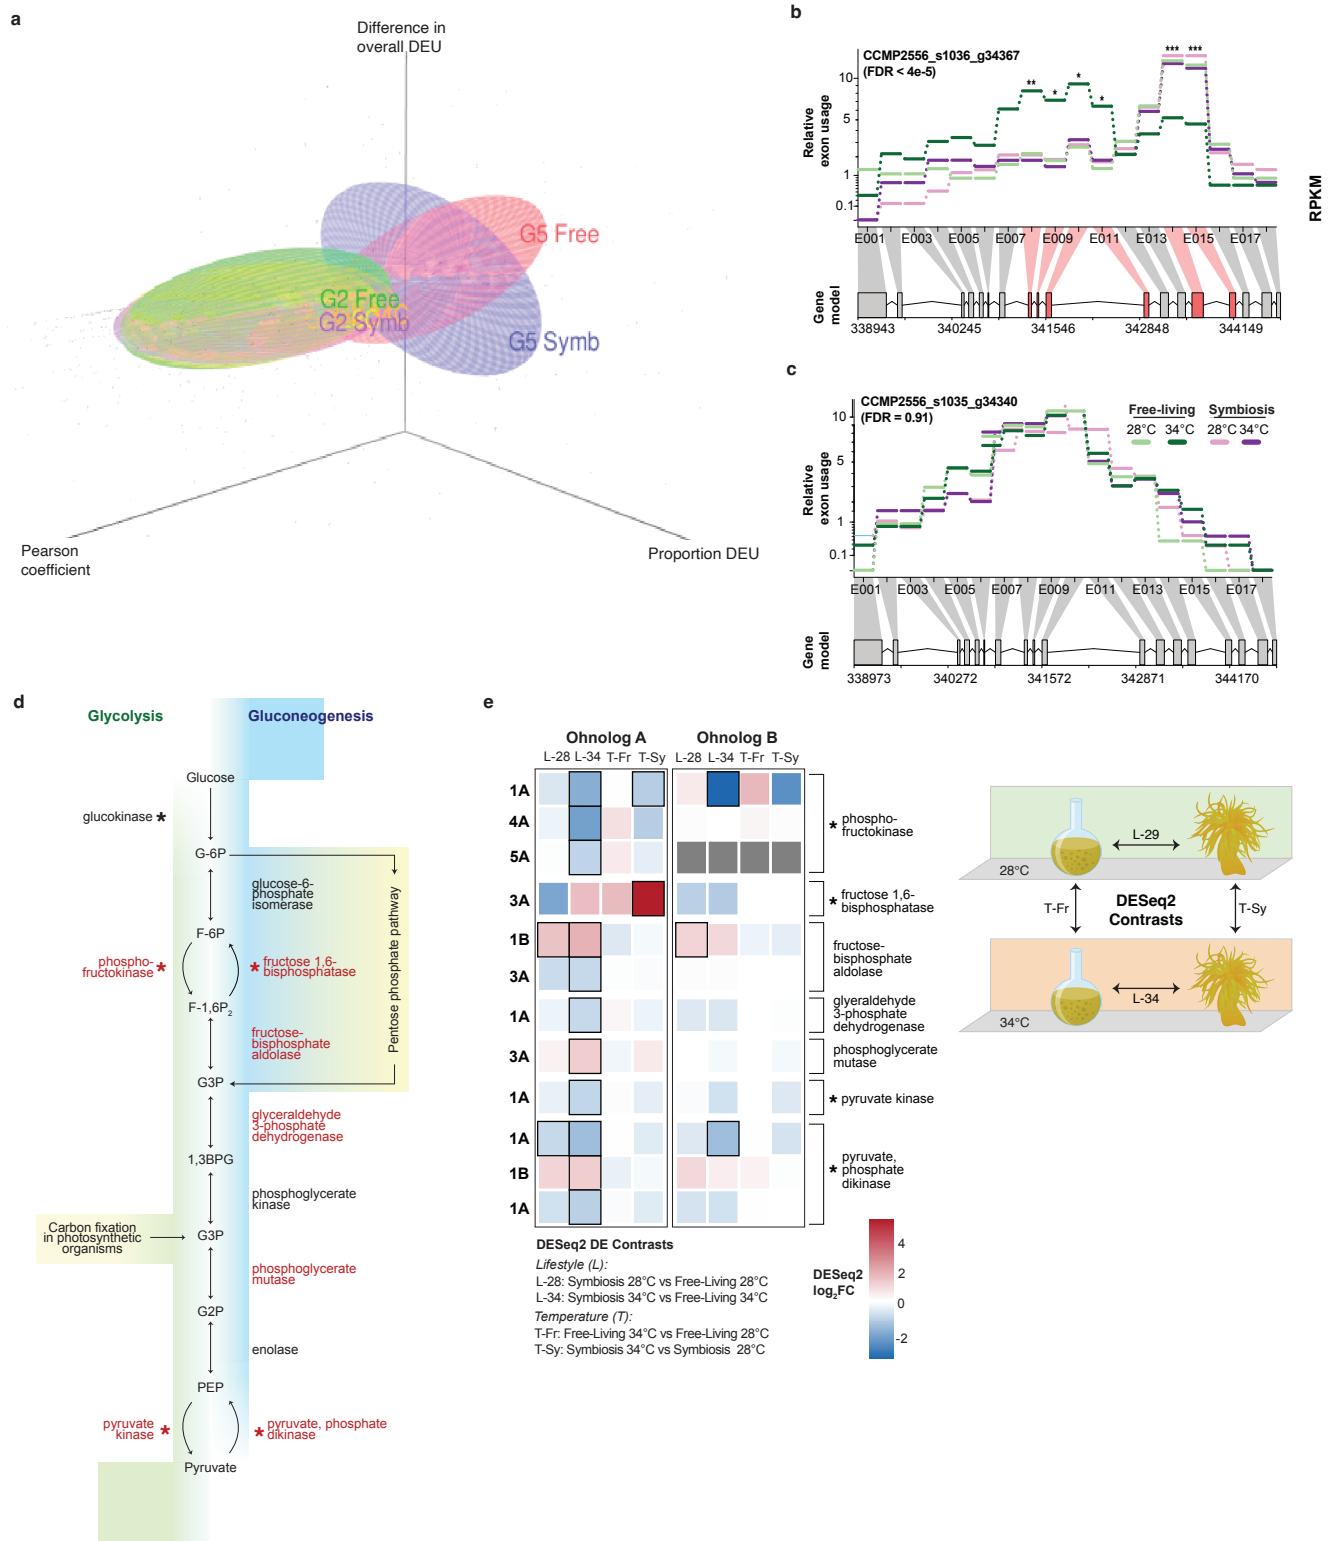

**Figure 3. Exon reorganization underlies functional divergence.** (a) Three-dimensional scatterplot depicting directionality of DEU among ohnologs pairs of Group 2 and Group 5, which reflects the pattern of gene-level DEU. The z-axis shows the absolute change in DEU (i.e. overall DEU) within each ohnolog pair from Groups 2 and 5, the x-axis shows the relative change in DEU (i.e. proportion of DEU), and the y-axis indicates Pearson correlation coefficient of the gene expression. An ohnolog-pair from Group 2 with (b) DEU in the ohnolog with gene-level DEU, and (c) no DEU in its counterpart. (d) Glycolysis and gluconeogenesis pathways for which genes indicated in red were implicated by differentially expressed ohnologs, and an asterisk indicating rate-limiting or key enzymes. (e) The log<sub>2</sub>(fold-change) in expression of differentially expressed ohnologs across distinct comparison of growth conditions with their corresponding scenario indicated on the right.

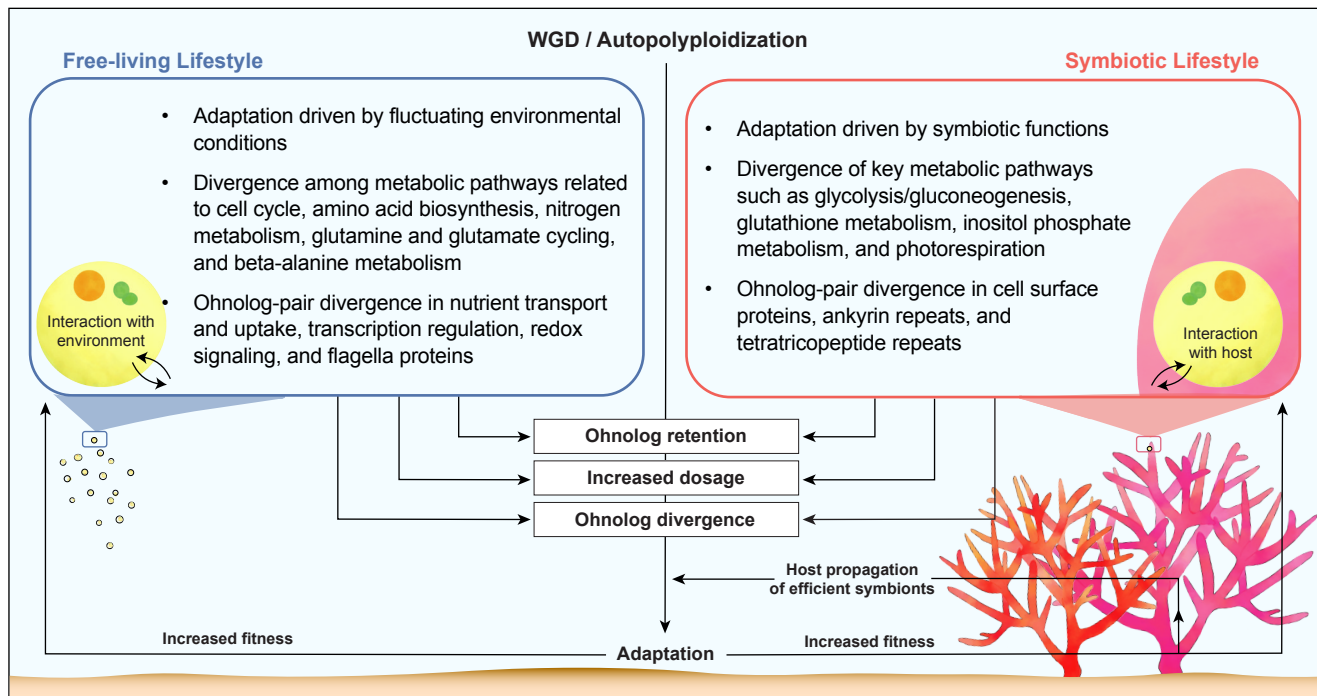

**Figure 4. Model of post-WGD divergence in a facultative endosymbiont.** Putative selective constraints faced by free-living and symbiotic Symbiodiniaceae under the dual lifestyle are shown, with a focus on post-WGD ohnolog sequence divergence and differential gene expression.
