# Supplementary material for: Whole-genome duplication in an algal symbiont bolsters coral heat tolerance
Source: bioRxiv or medRxiv preprint supplement (doi:10.1101/2022.04.10.487810), 2023-10-31
Supplement: Supplementary file [file media-1.pdf]

1 Supplementary Information

2 **Whole-genome duplication in an algal symbiont serendipitously confers**  
3 **thermal tolerance to corals**

4 Katherine E. Dougan<sup>1,2\*</sup>, Anthony J. Bellantuono<sup>3</sup>, Tim Kahlke<sup>4</sup>, Raffaella M. Abbriano<sup>4</sup>, Yibi  
5 Chen<sup>1</sup>, Sarah Shah<sup>1</sup>, Camila Granados-Cifuentes<sup>2</sup>, Madeleine J. H. van Oppen<sup>5,6</sup>, Debashish  
6 Bhattacharya<sup>7</sup>, David J. Suggett<sup>4</sup>, Cheong Xin Chan<sup>1\*</sup>, Mauricio Rodriguez-Lanetty<sup>2\*</sup>

7 **Affiliations:**

8 <sup>1</sup>The University of Queensland, School of Chemistry and Molecular Biosciences, Australian  
9 Centre for Ecogenomics, Brisbane, QLD 4072, Australia

10 <sup>2</sup>Florida International University, Department of Biological Sciences, Miami, FL 33099, U.S.A.

11 <sup>3</sup>Florida International University, Department of Biological Sciences, Biomolecular Science  
12 Institute, Miami, FL 33099, U.S.A.

13 <sup>4</sup>University of Technology Sydney, Climate Change Cluster, NSW 2007, Australia

14 <sup>5</sup>School of Biosciences, The University of Melbourne, Parkville, VIC 3010, Australia

15 <sup>6</sup>Australian Institute of Marine Science, Townsville, QLD 4810, Australia

16 <sup>7</sup>Rutgers University, Department of Biochemistry and Microbiology, New Brunswick, NJ 08901,  
17 U.S.A.

18 \*Correspondence: [k.dougan@uq.edu.au](mailto:k.dougan@uq.edu.au) (K. E. Dougan), [c.chan1@uq.edu.au](mailto:c.chan1@uq.edu.au) (C. X. Chan),  
19 [rodmauri@fiu.edu](mailto:rodmauri@fiu.edu) (M. Rodriguez-Lanetty)

## 20 **Materials and Methods**

### 21 **Symbiodiniaceae cultures and cell preparation for DNA extraction**

22 The *Durusdinium trenchii* strain CCMP2556 was originally isolated by Dr Mary Alice Coffroth  
23 (Buffalo University, New York, USA) from an *Orbicella faveolata* coral sampled at 10m depth  
24 on Tennessee Reef, Florida Keys (24.7335° N, 20.7669° W). The CCMP2556 culture was first  
25 acquired from the National Center for Marine Algae and Microbiota (Bigelow Laboratory for  
26 Ocean Sciences, East Boothbay, Maine), and maintained for one year in PROV-50 medium  
27 (NCMA) with an antimicrobial cocktail (kanamycin [50 µg/mL], ampicillin [100 µg/mL],  
28 streptomycin [50 µg/mL], amphotericin B [2.5 µg/mL]) to minimize bacterial and fungal  
29 contamination. During this time, the culture was passaged in the antimicrobial cocktail and  
30 inspected via light microscopy to confirm culture quality and the absence of microbial  
31 contamination on a monthly basis. PCR amplification and sequencing of the cp23S marker  
32 sequence was also regularly conducted for comparison to the known *D. trenchii* sequence to  
33 verify the genetic identity of the cultures. No other *Durusdinium* spp. were maintained in the  
34 laboratory prior to or during this time. To prepare the CCMP2556 cells for extraction of genomic  
35 DNA, the culture was cleaned using methods adapted from Su et al. (2007) to further minimize  
36 bacterial contamination. Briefly,  $5 \times 10^7$  log-phase cells were pelleted via centrifugation (500 g, 3  
37 min) and resuspended in 40 mL sterile PROV-50 medium using the antimicrobial cocktail above.  
38 Cells were then pelleted and resuspended in PROV-50 medium with 0.005% Tween-80 and  
39 EDTA (0.1 M, pH 8.0). Resuspended cells were incubated at 25°C for 1 hour on a platform

40 rocker followed by the addition of lysozyme (0.5 mg/mL) and SDS (0.25%) and another  
41 incubation at room temperature (RT) with rocking for 10 minutes. Finally, cells were washed  
42 three times with PROV-50 medium containing the antimicrobial cocktail, and snap-frozen in  
43 liquid nitrogen prior to DNA extraction.

44 The *D. trenchii* strain SCF082 (previously designated UTSD amur-D-MI) was originally isolated  
45 from an *Acropora muricata* coral colony on the Great Barrier Reef (Magnetic Island) and  
46 maintained at the Australian Institute for Marine Science (AIMS) culture collection, prior to  
47 shipment to University of Technology Sydney. SCF082 was grown in xenic cultures in 200mL  
48 IMK medium (Daigo's IMK powder for microalgae) for 2 weeks at 24°C under 25  $\mu\text{mol/s/m}^2$   
49 light and pelleted in 50mL Falcon tubes at 1,000 RPM (ELMI CM-6MT centrifuge ~184 g). To  
50 reduce bacterial contamination, cell pellets were washed three times by re-suspending them in  
51 sterile PBS buffer (50 mL) and pelleting again at 1,000 RPM (ELMI CM-6MT centrifuge ~184  
52 g). Bacterial contamination was assessed before and after wash based on plating on Marine Agar,  
53 and cell count by flow cytometry: cells were stained with SYBR Green for 15 minutes in the  
54 dark prior to detection by a Cytoflex S flow cytometer (Ex: 488 nm, Bandpass filter: 525/40).  
55 Flow cytometer results showed a 90% reduction in bacterial contamination. Final pellets were  
56 combined and pelleted once again at 4,000 g (5 min), and snap-frozen in liquid nitrogen before  
57 DNA extraction.

#### 58 **Extraction of genomic DNA and sequencing of 10X Genomics linked reads**

59 To extract genomic DNA from CCMP2556 cells, frozen cells (above) were ground together with  
60 acid-washed 425-600  $\mu\text{m}$  glass beads (Sigma) in a liquid nitrogen-chilled mortar and pestle. The  
61 ground cells (~50 mg) were used for DNA extraction using the MagAttract HMW DNA Kit

62 (Qiagen) following the manufacturer's protocol. To minimize DNA degradation, wide-bore  
63 pipette tips were used for all steps involving the handling of lysate or DNA, and mixing was  
64 performed by gentle inversion instead of the manufacture-indicated pipetting. The final DNA  
65 was eluted in Buffer AE (Qiagen; 10 mM Tris-Cl 0.5 mM EDTA, pH 9.0) and stored at -20°C.  
66 The DNA sample was analyzed using pulse-field gel electrophoresis which indicated the  
67 presence of an intact sample (mean fragment size ~100 kb), confirming DNA integrity. The  
68 Chromium library was constructed using 1 ng of genomic DNA as input, and sent for sequencing  
69 at HudsonAlpha Institute for Biotechnology (Huntsville, AL) using the Illumina HiSeq X  
70 platform (two lanes, 2×150 bases paired-end; table S1).

71 To extract genomic DNA from SCF082, cell lysis was performed on snap-frozen cells using a  
72 custom-made French press with two passes at 1,000 psi. Lysate was collected and subjected to  
73 standard extractions using ice-cold phenol:chloroform:isoamyl alcohol (25:24:1, v/v/v), and  
74 chloroform:isoamyl alcohol (24:1, v/v). DNA was precipitated using sodium acetate (pH 5.2;  
75 final concentration 0.3M), and an equal volume of ice-cold isopropanol. Precipitated DNA was  
76 washed with 70% ethanol and resuspended in TE buffer (overnight, room temperature) to allow  
77 for high-molecular weight fragments to redissolve. DNA was size selected using BluePippin  
78 (SageScience) pulse-field gel electrophoresis prior to 10X Chromium library preparation. The  
79 library was sent to Ramaciotti Center for Genomics, University of New South Wales (Sydney,  
80 Australia) for sequencing using Illumina NovaSeq 6000 (S1 flow cell, 2×150 bases paired-end).

### 81 ***De novo* genome assembly**

82 For each isolate, a preliminary draft genome was assembled *de novo* using 10X Genomics  
83 Supernova v2.1.1. For CCMP2556, the estimated genome coverage (~100×) exceeded the

84 optimal range (38–56×) of the Supernova assembler; we subsampled the 1.6B reads to 600M  
85 reads (~60× coverage). For SCF082, coverage estimates were observed to be impacted due to the  
86 presence of contaminant DNA from microbial sources in the sequencing reads; the *de novo*  
87 assembly was generated using all 1.4B reads with the flag `-accept_extreme_coverage`.

88 Presence of putative contaminant scaffolds in the supernova assemblies was investigated using a  
89 comprehensive approach adapted from Iha *et al.* (33) informed by read coverage, G+C content,  
90 taxonomic designation, and *de novo* transcriptome mapping (fig. S16). Taxon-annotated G+C-  
91 coverage plots (fig. S20) were generated using the Blobtools suite (v1.1) (34) to identify  
92 scaffolds in each assembly that deviated by read coverage, taxonomic sequence similarity, and/or  
93 G+C content (fig. S26). Read coverage was obtained via BWA (v0.7.17) mapping of Longranger  
94 (v2.2.2) (35) quality-trimmed reads (default settings) to the genome assembly. The taxonomic  
95 identity of scaffolds was assigned based on BLASTN search ( $E \leq 10^{-20}$ ) against genome  
96 sequences from bacteria, archaea, viruses, and alveolates in the NCBI nt database (release 2021-  
97 05-10). *De novo* transcriptome assemblies were mapped to the genome assemblies using  
98 Minimap2 (v2.18) (36) within which we have modified the codes to account for non-canonical  
99 splice sites of dinoflagellates. Scaffolds that were designated as non-dinoflagellate were removed  
100 from the assemblies if they lacked mapped transcripts from the corresponding *de novo*  
101 transcriptome assembly, when <10% of mapped transcripts indicate evidence of introns in the  
102 genomes. We considered a scaffold as a putative contaminant if (a) its sequence coverage or  
103 G+C content is out of the 1.5\*interquartile range, and (b) it lacks any transcript support defined  
104 above. Upon removal of these putative contaminant sequences from the CCMP2556 assembly,

105 the filtered assembly was incorporated in the database as the *D. trenchii* reference for assessing  
106 the assembled scaffolds of SCF082.

107 The filtered genome assemblies were then further refined using two separate scaffolding  
108 programs, first with L\_RNA\_Scaffolder (37) followed by ARBitR (38) to yield the final  
109 assemblies. Briefly, *de novo* assembled transcripts were mapped onto the filtered genome  
110 assemblies using minimap2 modified to recognize non-canonical splice sites of dinoflagellates,  
111 and the mapping results were used to further scaffold the assembled genome sequences using  
112 L\_RNA\_Scaffolder at default parameters. Longranger basic quality-trimmed linked genome  
113 reads were mapped to the scaffolded genome assemblies with BWA for further scaffolding and  
114 collapsing with ARBitR, which incorporates the distance information from linked read  
115 sequencing when merging and scaffolding assemblies.

116 Genome size was estimated following the approach by Lin et al. (2015), where it is inferred from  
117 *k*-mers enumerated from filtered genome-sequence data (independently at *k* = 19, 21, 23, 25, 27,  
118 29 and 31), and the final estimate represents the average of these values. Sequence similarity of  
119 the CCMP2556 and SCF082 genomes was assessed using the nucmer function (--mum) from  
120 MUMmer v4.0.0 (39), requiring alignments of 100bp, 1kb, and 10kb with a minimum sequence  
121 identity at 90%.

## 122 **Ab initio prediction of protein-coding genes**

123 The prediction of protein-coding genes from assembled genome sequences was conducted using  
124 a comprehensive dinoflagellate-specific workflow (40). This workflow incorporates multiple  
125 evidence types including transcriptome and protein sequence data, integrating the results from

126 multiple predictors to yield high-quality gene models (table S2). RNAseq data was used to  
127 inform gene prediction and assembled separately for each of the four treatments in both isolates,  
128 via both *de novo* and genome-guided modes, yielding a total of 2,014,780 transcripts for  
129 CCMP2556 and 1,007,955 transcripts for SCF082 across the eight assembled transcriptomes in  
130 each isolate.

131 Gene models were functionally annotated using BLASTP ( $E \leq 10^{-5}$ ) searches against the  
132 UniProtKB (release 2021\_03; Swiss-Prot and TrEMBL) database. Pfam domains within  
133 predicted proteins were annotated using PfamScan ( $E \leq 0.001$ ) in conjunction with the Pfam-A  
134 database. Completeness of the genomes and the predicted proteins was performed using  
135 BUSCO5 (41) and the alveolata\_odb10 and eukaryota\_odb10 datasets under both genome and  
136 protein modes. A PCA plot of metrics of the predicted gene models compared to the rest of  
137 Suessiales was carried out using the prcomp package in R. Orthofinder v2.3.10 (42) was used to  
138 infer homologous gene sets among Suessiales species using NCBI-BLAST.

### 139 **Inference of collinear gene blocks and putative ohnologs**

140 Collinear gene blocks were identified with the program MCScanX (43) using both intra-species  
141 mode (-b 1) to identify putative duplicate gene blocks within each genome (i.e. segmental and/or  
142 whole-genome duplication) and inter-species mode (-b 2) to identify syntenic gene blocks  
143 between the two genomes. For each comparison, all-vs-all BLASTP search results were  
144 restricted to the top five hits for each protein with 50% sequence alignment of either query or  
145 subject. Predicted genes from each genome were classified according to their duplication history  
146 using MCScanX's *duplicate\_gene\_classifier* as singleton, dispersed duplicates (i.e. duplicates  
147 separated by more than 20 genes), proximal duplicates (i.e. duplicates separated by less than 20

148 genes), tandem duplicates, and WGD/segmental duplicates (i.e. ohnologs). The rates of  
149 asynonymous ( $K_a$ ) and of synonymous ( $K_s$ ) substitutions were estimated for ohnolog gene pairs  
150 using the *add\_ka\_to\_ks\_to\_synteny.pl* perl script following Clustal Omega v1.2.4 alignment.

151 The putative WGD event was further investigated for CCMP2556 using the wgd pipeline (44).  
152 Briefly, homologous protein clusters were inferred using a Markov Clustering algorithm (45)  
153 from the previous all-vs-all BLASTP search used for MCScanX and aligned with MAFFT (46).  
154 Phylogenetic trees of homologous protein clusters inferred with FastTree2 (47) were then used to  
155 estimate  $K_s$  values for each cluster using codeml from the PAML package (48). A Gaussian-  
156 mixture model (GMM) was applied to the  $K_s$  distribution, using a four-component model that  
157 provided the best fit for the data according to Akaike information criterion (AIC), yielding a final  
158 node-averaged histogram of  $K_s$  distribution. The *D. trenchii* NIES-2907 assembly from Shoguchi  
159 *et al.* (49) was not included in this and further analyses considering it was assembled from short-  
160 read Illumina sequencing and is the smallest Symbiodiniaceae genome assembly with the lowest  
161 number of predicted genes.

## 162 **Ohnolog gene expression divergence**

163 To assess gene expression, all RNA-Seq reads were first quality-trimmed using fastp (mean  
164 Phred quality  $\geq 30$  across a 4bp window; minimum read length of 50bp). To assess divergence of  
165 expression between each ohnolog in an ohnolog-pair, trimmed RNA-Seq reads were mapped to  
166 the corresponding genome using Hisat2 v2.2.1 (--concordant-only) with a Hierarchical Graph  
167 FM index that is informed by annotated exon and splice sites. Counts of uniquely mapped  
168 paired-end (PE) reads overlapping with coding sequence (CDS) regions were then enumerated



169 using featureCounts (-p --countReadPairs --B -C) from Subread v0.2.3 (50) and fragments per  
170 kilobase of transcript per million mapped reads (FPKM) calculated from the counts.

171 To investigate the gene expression profiles of ohnolog pairs, an ohnolog pair with one or both  
172 non-functionalised (i.e. non-expressed) gene(s) were first identified based on mapping of RNA-  
173 Seq reads to these ohnolog copies. To consider an ohnolog as “expressed”, a mean FPKM > 1  
174 was required in at least one of the four treatments. Ohnolog pairs for which one copy was not  
175 expressed (FPKM < 1 in all conditions for one ohnolog; FPKM ≥ 1 in one or more conditions for  
176 the other) represent non-F in one ohnolog copy. In cases for which both ohnologs were expressed  
177 (FPKM > 1), the  $\log_2(\text{FPKM} + 1)$  expression values were used to classify ohnolog pairs  
178 according to their expression profile into four groups: High Correlation and Similar Expression  
179 (HCSE), High Correlation and Different Expression (HCDE), Low Correlation and Similar  
180 Expression (LCSE), and Low Correlation and Different Expression (LCDE). A Spearman  
181 correlation test was used to assess similarity in expression profiles: ohnolog pairs with  
182 coefficients > 0.7 or < -0.7 designated as High Correlation (HC), whereas those with coefficients  
183 between -0.7 and 0.7 as Low Correlation (LC). A paired *t*-test of across all treatments and  
184 replicates was used to identify ohnolog pairs with Similar Expression (SE,  $p < 0.05$ ) or Different  
185 Expression (DE,  $p > 0.05$ ). Ohnolog pairs that switched in dominance across treatments and are  
186 potential cases of sub-functionalization or neo-functionalization, were identified using unique  
187 mapping results (i.e. no mapping from a read pair to more than one gene) using a paired *t*-test on  
188 the  $\log_2(\text{FPKM}+1)$  values for each treatment separately, requiring each ohnolog to be dominant  
189 to the other in at least one treatment ( $p < 0.05$ ) and were input to topGO for Gene Ontology  
190 enrichment analysis ( $p < 0.01$ ).

191 A weighted gene co-expression network analysis (WGCNA) was then performed on all genes in  
192 R using the WGCNA package. The raw counts from htseq-count were first filtered to remove  
193 lowly (<10 reads) expressed genes and variance normalized counts were acquired using the  
194 standard DESeq2 workflow followed by its *varianceStabilizingTransformation*. As symbiosis is  
195 a strong driver of expression in Symbiodiniaceae, using the inferred soft-thresholding power for  
196 reducing noise and setting a required threshold for gene correlations would have yielded a mean  
197 connectivity of over 4,000 at the inferred power of 6. Therefore a weighted, unidirectional co-  
198 expression network was inferred using a power of 18, the recommended value for signed  
199 networks with less than 20 samples. Co-expression similarity and adjacency was then assessed  
200 and converted into a topological overlap matrix (TOM). A gene dendrogram was then produced  
201 through hierarchical clustering (method=complete) of the corresponding TOM dissimilarity and  
202 branches, representing highly co-expressed genes, were cut using dynamicTreeCut (deepSplit=2,  
203 pamRespectsDendro=FALSE, minModuleSize=30). Module eigengenes were then clustered  
204 (method=average) followed by the merging of those with similar expression correlations  
205 (eigengene correlation  $\geq 75$ ). Significant relationships between modules and the factors  
206 symbiosis and temperature was then assessed and a *p*-value and correlation assigned to the  
207 module.

208 The distribution of ohnolog gene pairs throughout the WGCNA modules was then examined and  
209 pairs classified into different categories using a decision tree (fig. S8) that represent the level of  
210 conservation and/or divergence of gene expression in relation to symbiosis and temperature. Due  
211 to the stronger effect of symbiosis compared to temperature on gene expression, nearly all  
212 ohnolog pairs for which both genes were expressed (9,684 ohnolog pairs) exhibited a correlation

213 to symbiosis in at least one of the two ohnologs in a pair (9,499 ohnolog pairs) while far fewer  
214 pairs exhibited any correlation to temperature (2,294 ohnolog pairs). To account for these  
215 disparate effects, the expression patterns of ohnolog pairs for each of the two variables were  
216 represented as proportions, in context of the number of ohnolog pairs exhibiting a correlation to  
217 that specific variable. The expression patterns of ohnolog pairs were first broken down into those  
218 with “Similar Profiles”, or when both ohnologs in a pair exhibited the same expression pattern of  
219 either a Positive or Negative correlation to both symbiosis and temperature. Other ohnolog pairs  
220 were designated as having “Dissimilar Profiles” as the two ohnologs exhibited conflicting  
221 patterns to either symbiosis and/or temperature. Of those with “Dissimilar Profiles”, if they had  
222 diverged in expression pattern (i.e. one positive and one negatively correlated) to one of the two  
223 factors they were considered as “Divergent” for that factor or “Conserved” if they exhibited the  
224 same pattern for that factor. Those pairs where only one of the two ohnologs exhibited a  
225 significant correlation to a factor were considered as a “Gain/Loss” scenario, where one of the  
226 two genes either gained or lost a relationship to that factor.

### 227 **Detection of metabolic pathways preferentially retained in duplicate**

228 Metabolic enzyme detection was conducted using PRIAM v2 (January 2018 release). Following  
229 the formula used in Aury *et al.* (19), we inferred metabolic pathways that were preferentially  
230 retained in duplicate following WGD. Briefly, we identified metabolic enzymes that had been  
231 uniquely retained as ohnologs or singletons. We then compared the proportion of enzymes  
232 uniquely retained as ohnologs to singletons, to the background proportion of the number of  
233 ohnologs and singletons annotated in the genome. This tests whether the number of uniquely  
234 retained metabolic enzymes for a particular pathway exceeds the background levels that would

235 be expected to occur by random. We additionally required (a) five or more distinct enzymatic  
236 proteins to be identified as uniquely retained in either duplicate or singleton, and (b) pathways to  
237 be significantly overrepresented in both isolates.

### 238 **Ohnolog splicing divergence**

239 To examine the level of conservation of splice junctions in ohnolog pairs, all *de novo* assembled  
240 transcripts were first aligned to the genome using a modified minimap2 v2.20 and then input to  
241 PASA for identification and annotation of splice sites. Splice sites categorized as alternative  
242 acceptor, alternative donor, alternative exon, retained exon, and skipped exon were retained for  
243 subsequent analysis. Each identified splice event was assigned two unique identifiers to represent  
244 the upstream and downstream positions of the splice event, along with its gene identifier and  
245 genomic location. The upstream and downstream 300bp-region for each splice event were then  
246 extracted using the bedtools v2.30 *flank* and *getfasta* functions. An all-versus-all BLASTN  
247 search of the extracted splice junction sequences was used to identify sequence similarity ( $E \leq$   
248  $10^{-5}$ ) between the sequences. Custom Python scripts were then used to filter the BLASTN results  
249 to identify conserved splice junctions, defined as splice junctions where both the upstream and  
250 downstream regions for a splice event in two ohnologs were significantly similar ( $E \leq 10^{-5}$ ). The  
251 splice junction profile for each ohnolog pair was then converted to a binary representation, where  
252 the presence of a splice junction in an ohnolog was represented as 1 and the absence of a splice  
253 junction represented as 0 (i.e., conserved splice junctions represented as 1 in both ohnologs  
254 compared to 1 and 0 for those that were not conserved. A Kendall's rank correlation was then  
255 conducted in R to identify ohnolog pairs that exhibited high level of conservation in splice

256 junctions. An exact binomial test was also performed to identify ohnolog pairs that had diverged  
257 in terms of total splice junctions ( $p < 0.05$ ).

258 For inferring differential exon usage (DEU) within genes among the treatment conditions, gene  
259 models were first broken up into exon “counting bins” using the Python script  
260 *dexseq\_prepare\_annotation.py* from DEXSeq. The relative usage of each exon bin, i.e. the  
261 number of transcripts mapping to the bin or to the gene, was then calculated from the hisat2  
262 BAM file using *dexseq\_count.py*. The DEXSeq R package was then used to infer differential  
263 exon usage within genes using a generalized linear model, correcting for significance at the gene  
264 level using the Benjamini-Hochberg method. For singletons and ohnologs, we extracted and  
265 plotted the  $\log_2(\text{fold-change})$  of highly significant DEU (adjusted  $p < 0.01$ ) to view the  
266 differentially expressed exons.

## 267 **RNA editing**

268 Detection of mRNA editing events was inferred using JACUSA2 with hisat2-mapped RNA-seq  
269 reads and bowtie2-mapped longranger-trimmed 10X genomic reads using the *--very-sensitive*  
270 mode. PCR duplicates were removed from the BAM files using the *MarkDuplicates* function  
271 from the Picard Toolkit v2.26.2 (<https://broadinstitute.github.io/picard/>). Putative sites of mRNA  
272 editing identified by JACUSA2 were first filtered to meet the criteria of the D, Y, H feature  
273 filters. A second round of filtering was then performed using the R package JACUSA2helper,  
274 further requiring a score  $\geq 1.15$ ,  $>10$  read coverage in DNA,  $>5$  read coverage in each RNA  
275 replicate, observed bases  $\leq 2$ , and the inference of RNA editing across all four treatments.

## 276 **Supplementary Text**

277 **Genome assembly of *Durusdinium trenchii***

278 Coral reef ecosystem health is critically regulated by the functional performance of the  
279 microalgae (Family: Symbiodiniaceae) that thrive in endosymbiosis with reef-forming corals.  
280 Optimum metabolically-derived nutrient exchange between these microalgae and coral (2, 3)  
281 fuels coral growth and calcification essential to reef productivity and accretion. However,  
282 amplifying anthropogenic stressors are increasingly driving sub-optimum environmental  
283 conditions for symbiosis that result in an accumulation of toxic metabolic biproducts (e.g.  
284 Reactive Oxygen Species; (51)), and in turn endosymbiont rejection from the host (“coral  
285 bleaching”). Episodes of mass – region-wide – coral bleaching have become increasingly  
286 common place changing the entire nature of coral reef systems (52, 53). Importantly,  
287 Symbiodiniaceae is an extremely taxonomic (1) and functionally (e.g. Suggett et al. 2015)  
288 diverse family, and more “stress-compatible” (or rather those suited to more suboptimal reef  
289 environment conditions) taxa can proliferate in coral tissues enabling persistence under  
290 conditions where corals would otherwise bleach (Berkelmans & van Oppen 2006, Claar et al.  
291 2020), including present day “natural extremes”, such as super-hot tidal pools and lagoons  
292 (Oliver & Palumbi 2010, Camp et al. 2019).

293 Resolving how these “stress compatible” symbionts have evolved and function has remained a  
294 major goal in efforts to better manage reef systems into the future, including through more  
295 aggressive active interventions to evolve more heat-tolerant symbionts or manipulating host-  
296 symbiont partnerships (van Oppen et al. 2015, Voolstra et al. 2021). Indeed, this evidence for  
297 WGD in *D. trenchii* has been linked to its thermotolerance, which is widely supported by eco-  
298 physiological observations whereby *D. trenchii* often replaces the pre-dominant coral symbiont

299 taxa under thermal stress, thereby conferring increased thermal tolerance to the host (54-56).

300 Generally greater thermotolerance of *D. trenchii* and the relatively recent spread of this species  
301 in the Caribbean (22) demonstrate the potential for *D. trenchii* to provide corals with more  
302 resilience to ocean warming.

303 We generated high-quality *de novo* genome assemblies from two isolates of *D. trenchii*:  
304 CCMP2556 (total length of assembly = 1.70 Gb; N50 = 750 Kb; 29, 137 scaffolds) and SCF082  
305 (total length of assembly = 1.64 Gb; N50 = 398.5 Kb; 44,682 scaffolds) using 10X Genomics  
306 linked reads (table S1). The CCMP2556 assembly is the most contiguous reported in  
307 Symbiodiniaceae aside from the recent chromosome-level assemblies for *Symbiodinium*  
308 *microadriaticum* (57) and *Breviolum minutum* (58). The estimated genome size based on *k*-mers  
309 is 1.05 Gb for CCMP2556 and 1.65 Gb for SCF082 (table sS1 and S2; see Methods); however,  
310 these sizes may be underestimated when a high amount of repetitive or duplicated DNA exist in  
311 a genome. The identity of the two isolates was confirmed by the comparison of ribosomal large  
312 subunit sequences that were identical between the two isolates and near identity of ITS2  
313 sequences with one mismatch in the 639bp D1/D2 region shared between the two genomes (fig.  
314 S1).

315 We used existing transcriptome data (24, 59) to guide prediction of protein-coding genes from  
316 the assembled genome sequences using a customized approach tailored for dinoflagellates (see  
317 Methods), yielding 55,799 protein-coding genes for CCMP2556 and 53,519 for SCF082 (table  
318 S3). In both cases, over 75% of the predicted genes are supported by transcriptome evidence  
319 (table S3). Genome data completeness, assessed using predicted proteins against the  
320 Benchmarking Universal Single-Copy Ortholog (BUSCO) (41) for Alveolata (alveolata\_odb10),

321 was 74.8% (CCMP2556) and 82.4% (SCF082) (table S5; see Methods). These numbers are  
322 higher than for an earlier published draft genome of *D. trenchii* (49) and those of most published  
323 dinoflagellate genomes analyzed using the BUSCO assessment of completeness.

324 Within the Order Suessiales, which contains both the family Symbiodiniaceae and the genus  
325 *Polarella*, *D. trenchii* genes revealed distinct patterns relative to introns and repetitive elements.  
326 A principal component analysis of various attributes of the predicted genes identifies longer  
327 introns and more introns per gene in the *D. trenchii* genome (fig. S11), although this trend was  
328 not specific to any category of gene duplication (fig. S12). Compared to other Symbiodiniaceae  
329 taxa (8), the repeat landscapes of both *D. trenchii* genomes (fig. S3) show a distinct distribution  
330 of predominantly LTR repeats, of which many are highly conserved (those constituting ~2% of  
331 the genome sequences have Kimura distances centered between 0 and 5). Long-interspersed  
332 nuclear elements (LINEs) and some LTRs appear to be highly divergent (Kimura distances >25),  
333 lending support to the notion of ancient LINE expansion in Symbiodiniaceae and *Polarella*, pre-  
334 dating the diversification of Suessiales (8, 60).

### 335 **Detection of mRNA editing**

336 Dinoflagellate genomes are known to use mRNA editing (61), a form of post-transcriptional  
337 regulation that can diversify an organism's response beyond what is coded in the genome, which  
338 has yet to be examined in context of WGD. Combining the transcriptome and genome data in a  
339 comparative analysis for CCMP2556, we identified 3,754 mRNA edited sites in gene regions:  
340 1,802 implicated in synonymous substitutions, 1,909 in missense (non-synonymous) mutations,  
341 and 43 in nonsense mutations (e.g. premature stop codons or truncation of protein sequences). Of  
342 these, most edited sites were identified in dispersed duplicates (1,351 = sites) followed by



343 ohnologs (1,255 sites), singletons (500 sites), tandem duplicates (92 sites) and proximal  
344 duplicates (33 sites; table S13). Among genes expressed in cells grown in the four distinct  
345 conditions, we identified 3,754 (*ex-hospite* at 28°C), 2,643 (*in-hospite* at 28°C), 2,687 (*ex-*  
346 *hospite* at 34°C), and 2,654 (*in-hospite* at 34°C) mRNA-edited sites. Of the total sites, more than  
347 one-half (1,112 [54.8%]) were identified in all four treatments, but all the edited sites were  
348 identified in genes expressed *ex-hospite* at 28°C (fig. S19); none were exclusively found *in-*  
349 *hospite* or in *ex-hospite* cells grown at 34°C. These results suggest that the majority of mRNA  
350 editing in *D. trenchii* occurs *ex-hospite* or in the absence of temperature stress *in-hospite*, and  
351 that there is a decrease in mRNA editing following the transition to a symbiotic lifestyle and/or  
352 exposure to thermal stress.

353 We then examined ohnolog divergence by searching for evidence of differential mRNA editing  
354 in relation to symbiotic lifestyle (i.e. edited site exclusive to either *ex-hospite* or *in-hospite*)  
355 and/or temperature stress (i.e. edited site exclusive to 28°C or 34°C). Of the 16 genes identified  
356 with differential mRNA editing (table S14), the majority of identified genes (15 genes; 93.8%)  
357 were associated with the symbiotic lifestyle, including a light-harvesting complex stress-related  
358 protein 3.1 (LHCSR3.1), sporozoite surface antigen MB2, two peridinin-chlorophyll  $\alpha$ -binding  
359 proteins, and an insulin-degrading enzyme. These symbiosis-driven edited sites were  
360 predominantly located in CDS regions, with the edited sites of only two genes, hypoxia-  
361 inducible factor prolyl hydroxylase 2 (HIF-PH2) and G-protein-signaling modulator 1 (Gpsm1),  
362 restricted to intron regions. The latter may represent editing in non-coding RNA and/or  
363 regulatory regions within introns. In contrast, differential mRNA editing between 28°C and 34°C  
364 was only found in two genes, Gpsm1 and a reticulocyte-binding protein 2 homolog a, with both

365 located in intron regions. Overall, these results reveal that the symbiotic lifestyle had a greater  
366 influence on the retention and divergence of ohnologs, suggesting *D. trenchii* may have adapted  
367 to life in different symbiotic modes.

### 368 **Global patterns in ohnolog divergence**

369 To gain deeper insights into the evolution of ohnologs post-WGD, we investigated their gene  
370 structure. We examined exon-intron structure by mapping *de novo* and genome-guided  
371 transcriptome assemblies to the genome to identify putative locations of alternative splicing  
372 (table S15). We compared the average number of splice junctions per gene among different  
373 categories of gene duplication (i.e. singleton, proximal duplicate, dispersed duplicate, tandem  
374 duplicate, and ohnolog) to determine the number of splice junctions, or genomic locations  
375 implicated in alternative splicing events among the ohnologs. On average, ohnologs contained  
376 significantly more splice junctions per gene (800) compared to any other category (each <400;  
377 fig. S22 and S23), which may indicate novel functions and/or a method of nonsense mRNA-  
378 mediated decay.

379 We then compared the alternative splicing profiles within ohnolog pairs to determine whether  
380 alternative splicing might be implicated in the divergence of gene duplicates following WGD.  
381 For each ohnolog pair, we determined the number of intron/exon splice junctions, then assessed  
382 the conservation of each splice junction by comparing upstream and downstream regions. We  
383 found that the number and conservation of splice junctions are both diverged in 569 ohnolog  
384 pairs, these numbers are similar, but the junctions are not conserved in 1587 pairs, whereas the  
385 numbers are dissimilar (but most junctions that are present are conserved) in 1786 pairs (table

386 S16). Taken together, the increased numbers of splice junctions and DEU in ohnologs implicate  
387 divergence in alternative splicing in the evolution of ohnologs following WGD.

388 We assessed the variability in exon usage due to alternative splicing by combining gene isoforms  
389 into non-overlapping exon “counting bins” and compared the number of mapped transcripts per  
390 exon across the gene expression treatments. We refer to this index as differential exon usage  
391 (DEU). We compared a reduced model that controlled for the other as a covariate (i.e. reduced  
392 model for temperature included life mode as a covariate) to identify significant DEU across  
393 treatments (Benjamini-Hochberg adjusted  $p < 0.025$ ) and then inferred DEU at the gene level  
394 (FDR  $< 0.025$ ) by accounting for the multiple tests of DEU for each exon in a gene. We found  
395 that 10,857 genes exhibit significant DEU: most of these are in relation to life mode (10,341  
396 genes) followed by temperature (1,444 genes) with only a few significant in both life mode and  
397 temperature (7 genes) (fig. S24 and table S17).

398 In contrast to small-scale duplication events, WGD enables the divergence of entire metabolic  
399 pathways. We assessed metabolic pathways in *D. trenchii* that were retained in duplicate, and if  
400 they exhibit divergence in expression of the implicated genes. Using the predicted proteins of  
401 both CCMP2556 and SCF082, we used the method of Aury *et al.* (19) to assess biased retention  
402 of ohnolog pairs coding for enzymes in metabolic pathways, by mapping the associated Enzyme  
403 Commission numbers to the KEGG database (62); see Methods. The proportion of enzymes  
404 coded by genes that were uniquely retained as ohnologs or singletons, compared to their overall  
405 proportions in the genome, was used to determine which KEGG pathways were preferentially  
406 retained in duplicate following WGD. In total, we identified 98 metabolic pathways that were  
407 preferentially retained in duplicate in both isolates (table S10).

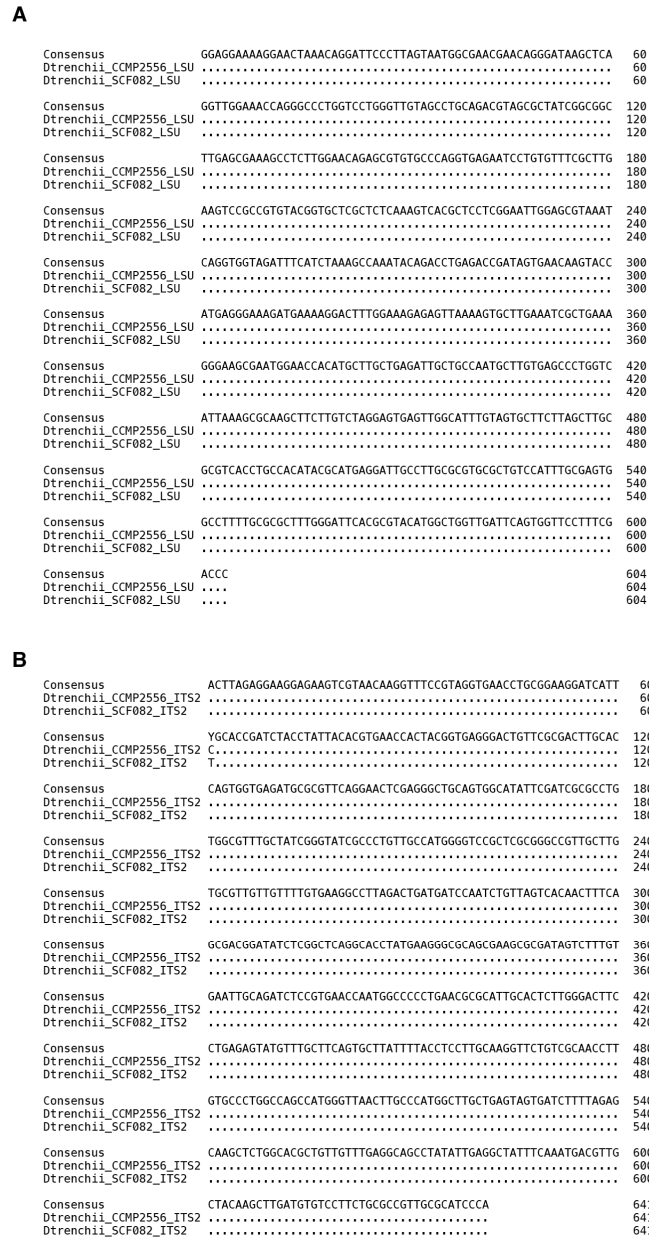

409

410 **Fig. S1. Marker gene alignment.**

411 Multiple sequence alignments for the (A) ITS2 and (B) LSU marker gene sequences for *D.*

412 *trenchii* isolates CCMP2556 and SCF082.

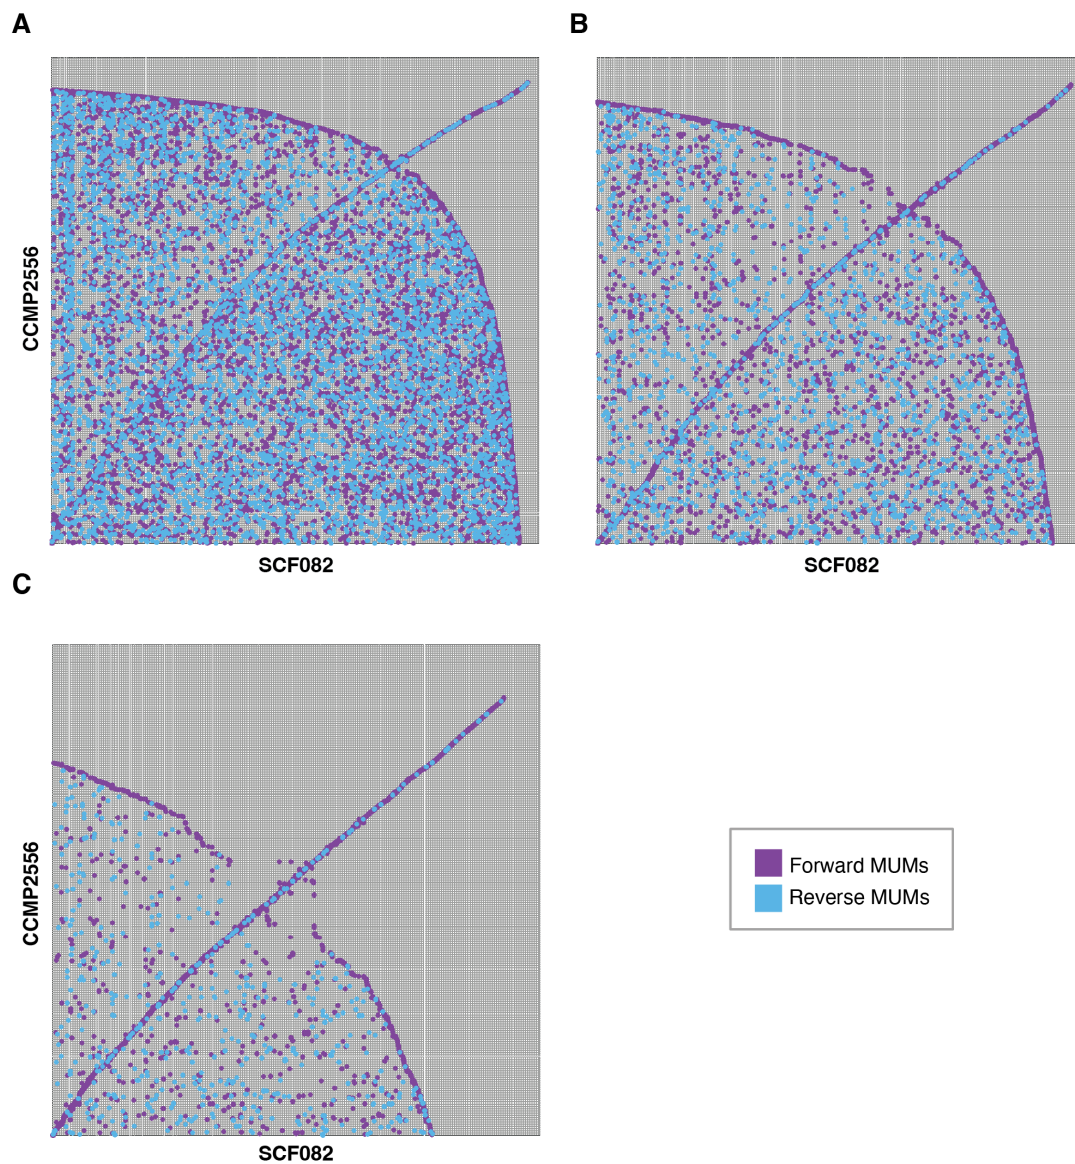

413

414 **Fig. S2. Dotplot showing sequence similarity between the *D. trenchii* CCMP2556 and**  
 415 **SCF082 genome assemblies.**

416 Dotplots indicate the sequence identity across the genomes requiring an alignment identity of  
 417 90% and alignment lengths of (A) 100 bp (B) 1 kb and (C) 10 kb. Maximal unique matches  
 418 (MUMs) in the forward direction are indicated with purple and in the reverse direction blue.

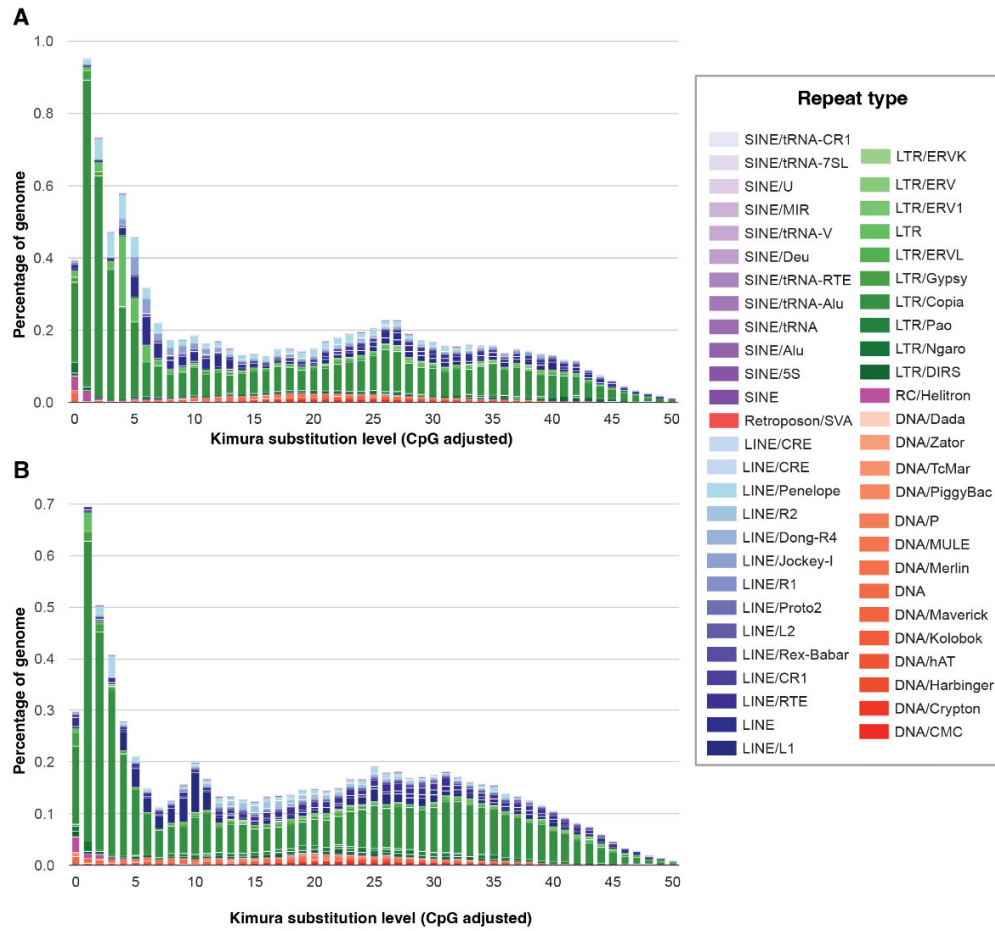

419

420 **Fig. S3. Repeat landscapes for *D. trenchii* (A) CCMP2556 and (B) SCF082.**

421 Distribution of different repeat families and types identified by RepeatModeler and

422 RepeatMasker. Kimura substitution level is represented on the x-axis and the percentage of the

423 genome length covered by each repeat type on the y-axis. Lower Kimura values represent more

424 recently diverging sequences and higher values more anciently diverging sequences.

425

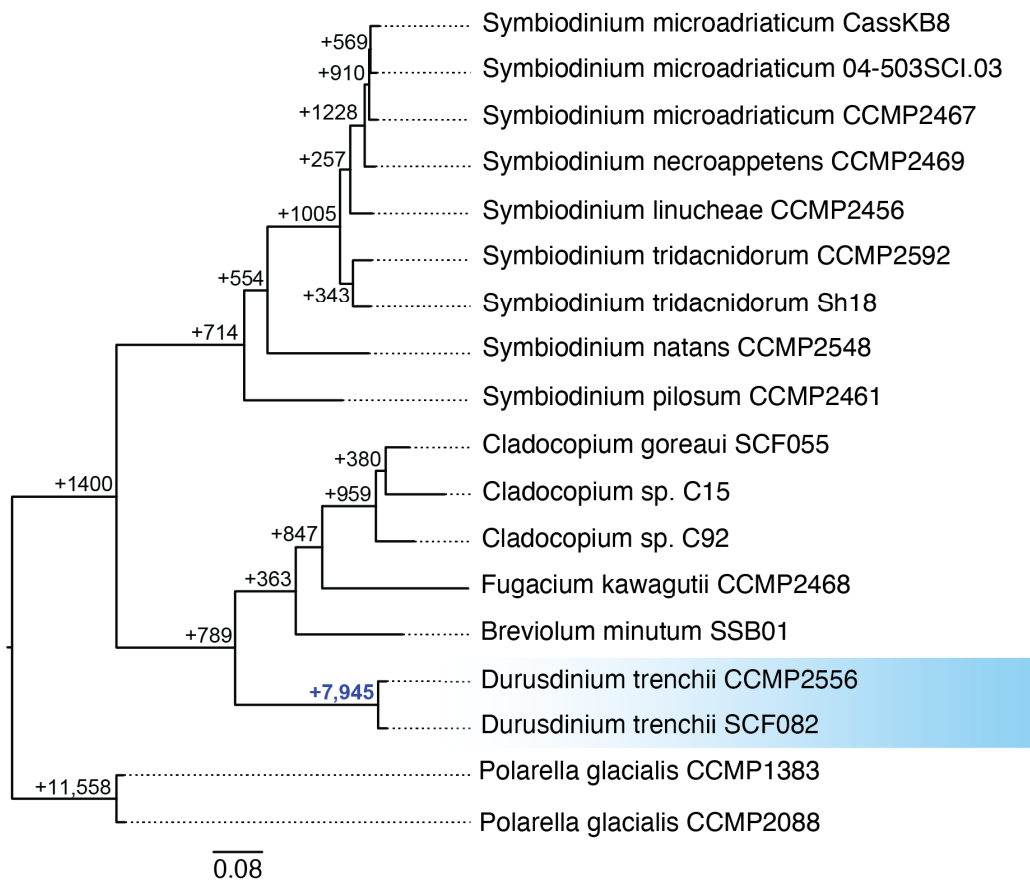

426

427 **Fig. S4. Phylogenetic inference of gene duplication events in protein families for different**  
 428 **lineages.**

429 The number of protein families experiencing a gene duplication event is represented at each node  
 430 of the representative species phylogeny as inferred by OrthoFinder2. Only clade-specific gene  
 431 family duplication events across Suessiales that have at least 50% support for occurring at that  
 432 node within the tree are shown.

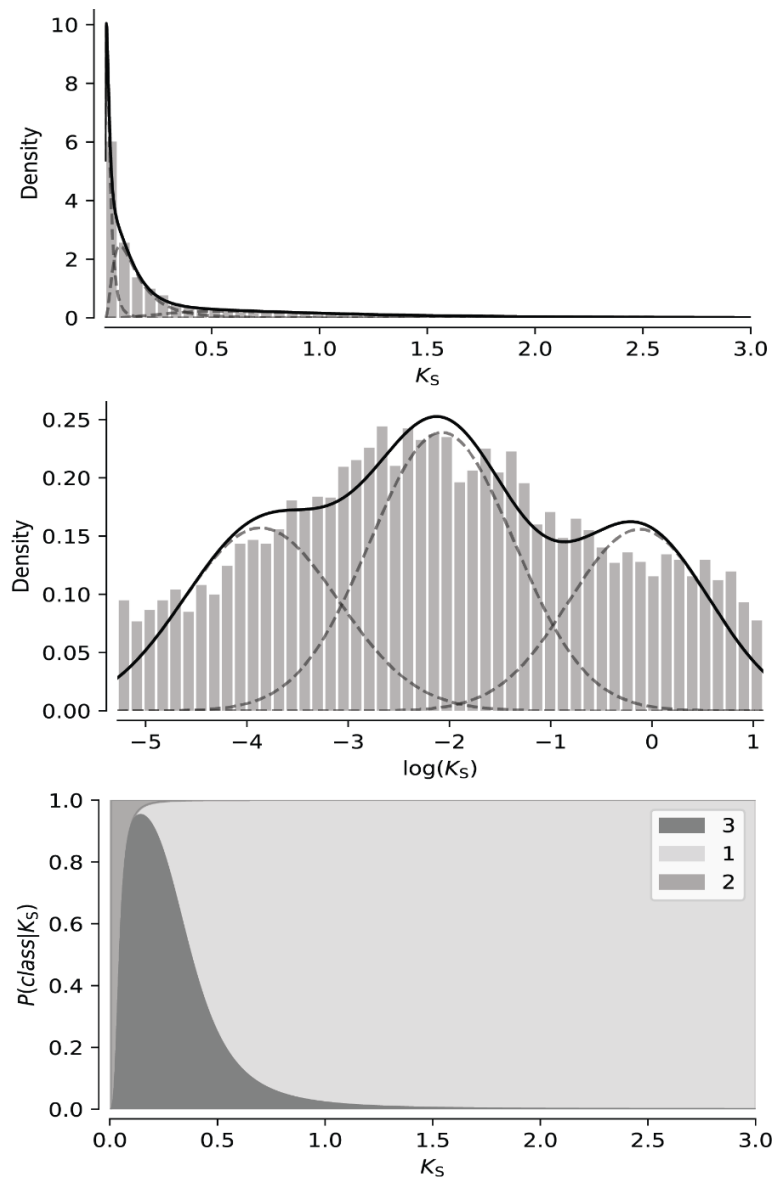

433

434 **Fig. S5.  $K_s$  plot of *D. trenchii* CCMP2556 isolate**

435 (A) Standard  $K_s$  plot for CCMP2556. (B) Log-normalized  $K_s$  plot for CCMP2556. (C)

436 Probability of genes along  $K_s$  plot falling into different categories according to the model.

437



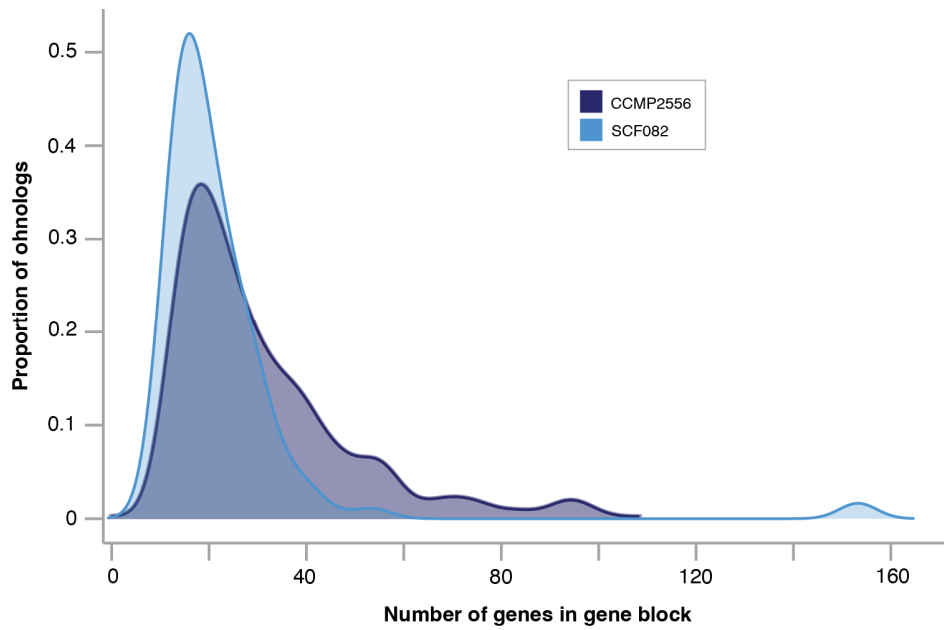

438

439 **Fig. S6. Number of genes in duplicated collinear gene blocks for CCMP2556 and SCF082**

440 Density plot of *D. trenchii* ohnologs relative to the size of the duplicated collinear gene block

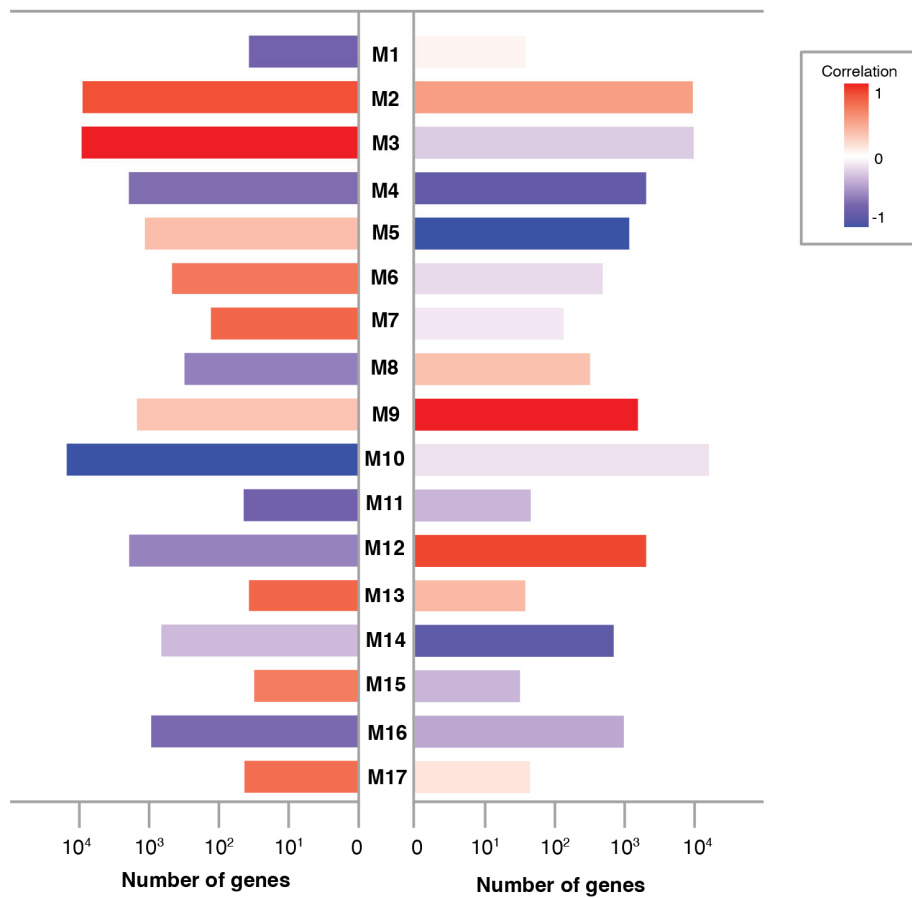

441

442 **Fig. S7. Barplot of significant modules in the WGCNA analysis**

443 Bar heights represent the number of genes in each module. Filled in bars were statistically  
 444 significant ( $p < 0.05$  : filled bar;  $p > 0.05$  outlined bar) and colors represent their Pearson  
 445 correlation coefficient to that variable.

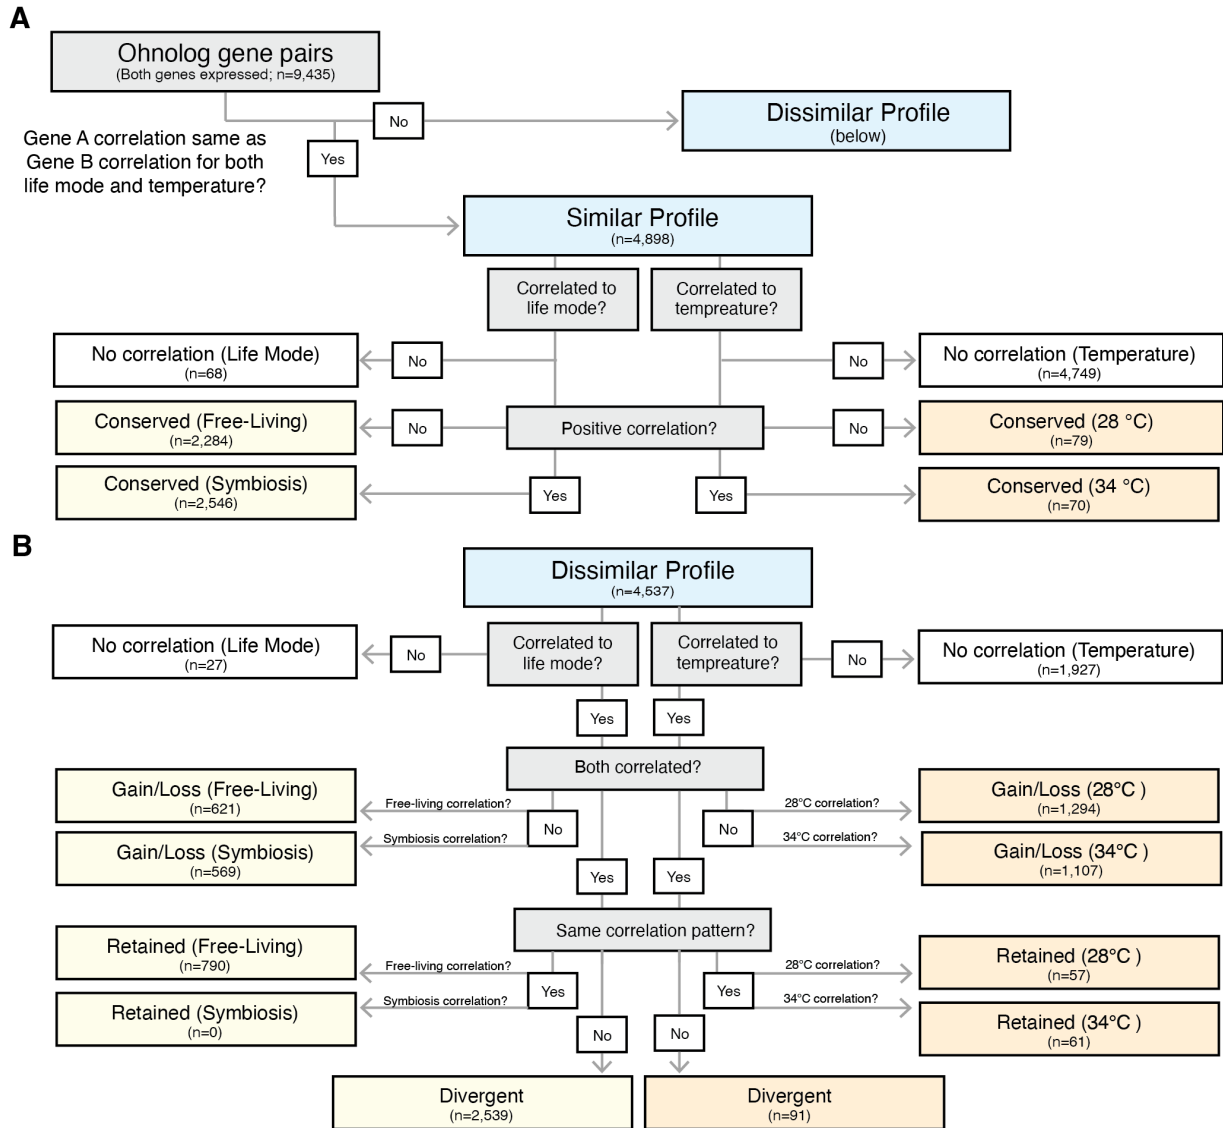

446

447 **Fig. S8. Decision tree for classifying ohnolog pairs into expression categories according to**  
 448 **their corresponding WGCNA modules.**

449 (A) Ohnolog-pairs that maintained the same expression correlation for both life mode and  
 450 temperature were designated as having “Similar Profiles”, and were further classified by whether  
 451 this conserved expression of the ohnolog-pair was correlated to the free-living or symbiotic life

452 modes or to 28°C or 34°C temperature. (B) Those ohnolog-pairs exhibiting some change in  
453 expression profile were designated as “Dissimilar Profiles”. Those with dissimilar profiles were  
454 first broken down by whether both ohnologs were correlated to life mode or temperature.  
455 Ohnolog-pairs where both ohnologs were correlated one of the two factors were then further  
456 classified by whether their correlations were both in favor of one either symbiosis (i.e.  
457 “Retained: Symbiosis) or free-living lifestyles (i.e. “Retained: Free-Living) for life mode, or  
458 34°C (i.e. “Retained: 34°C) and 28°C (i.e. “Retained: 28°C) for temperature. If they exhibited  
459 contrasting expression correlations, they were labelled as “Divergent”. If only one ohnolog  
460 exhibited a correlation, they were labelled as “Gain/Loss” and with the directionality of the  
461 ohnolog correlated to that factor.

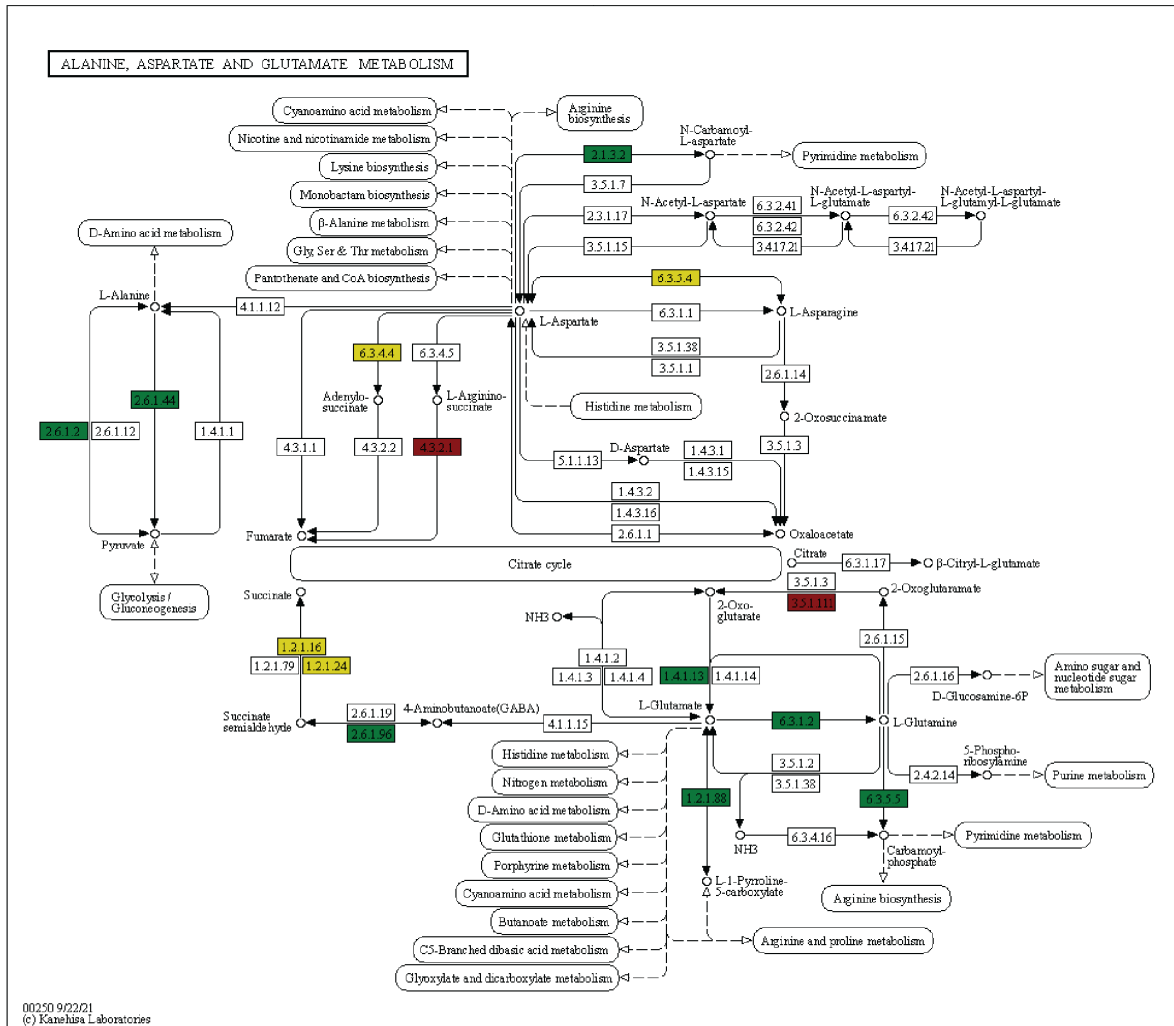

- Symbiosis: Conserved and Retained
- Symbiosis: Conserved and Retained and Divergent
- Free-Living: Conserved and Retained
- Free-Living: Conserved and Retained and Divergent
- Divergent
- Symbiosis: Conserved and Retained and Free-Living: Conserved and Retained

462

463 **Fig. S9. KEGG pathway for Alanine, Aspartate, and Glutamate Metabolism, with colored**  
 464 **enzymes indicating KEGG IDs of ohnologs retained in duplicate annotated by PRIAM**  
 465 **from the Conserved, Retained, and Divergent WGCNA ohnolog-pair categories.**



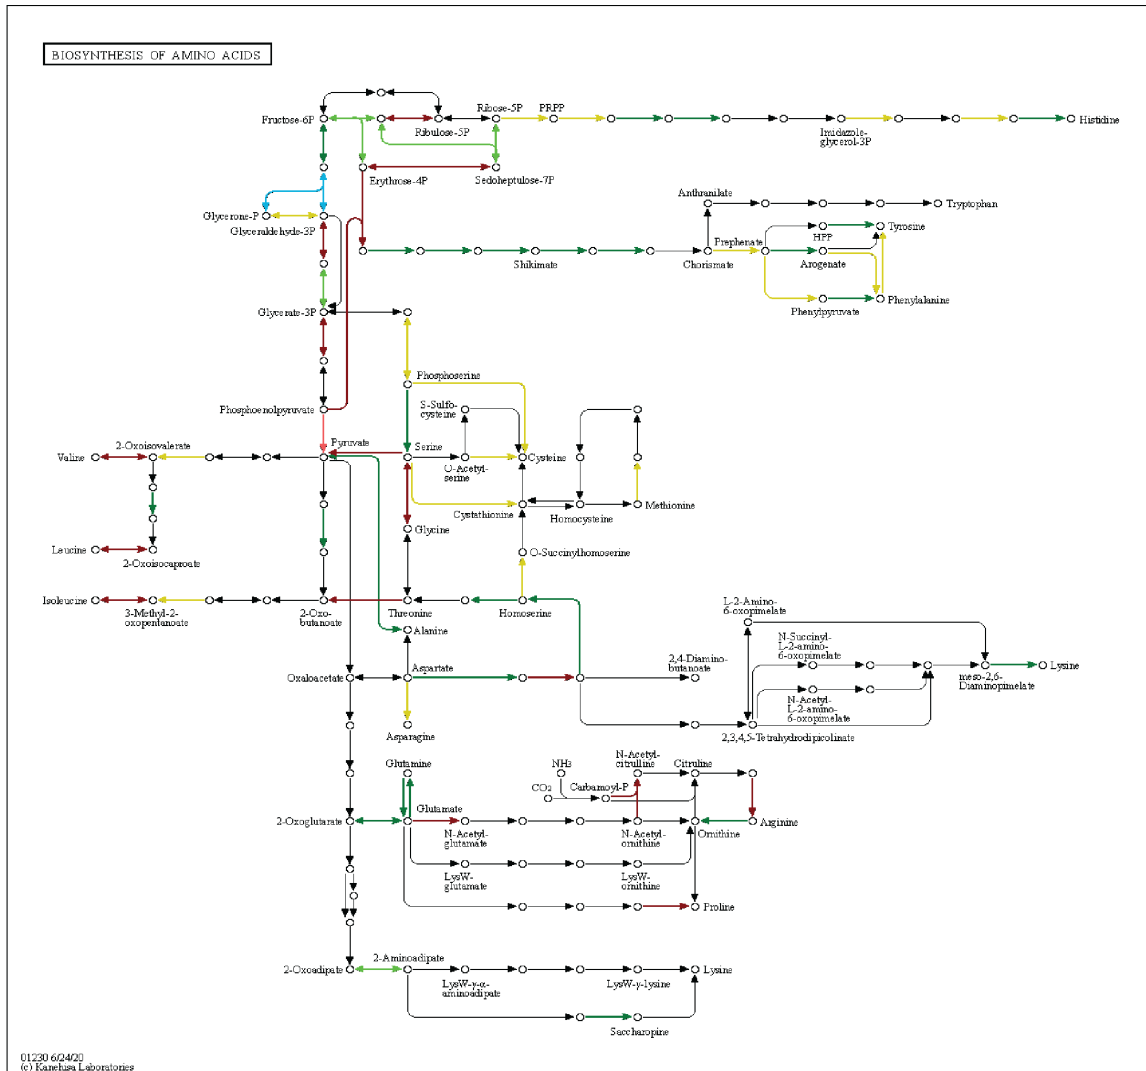

- Symbiosis: Conserved and Retained
- Symbiosis: Conserved and Retained and Divergent
- Free-Living: Conserved and Retained
- Free-Living: Conserved and Retained and Divergent
- Divergent
- Symbiosis: Conserved and Retained and Free-Living: Conserved and Retained

470

Fig.

471 **S11. KEGG pathway for Biosynthesis of Amino Acids, with colored enzymes indicating**  
 472 **KEGG IDs of ohnologs retained in duplicate annotated by PRIAM from the Conserved,**  
 473 **Retained, and Divergent WGCNA ohnolog-pair categories.**

474

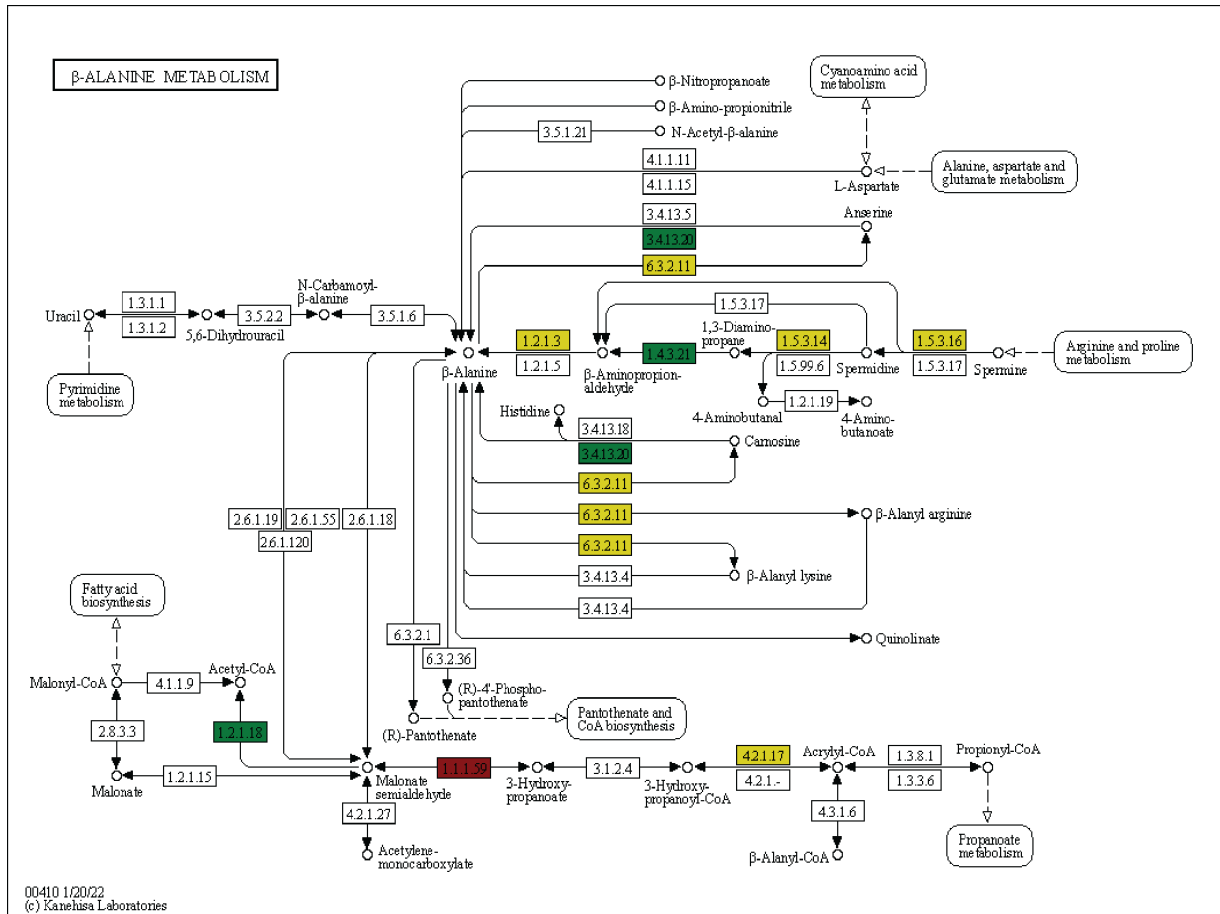

- Symbiosis: Conserved and Retained
- Symbiosis: Conserved and Retained and Divergent
- Free-Living: Conserved and Retained
- Free-Living: Conserved and Retained and Divergent
- Divergent
- Symbiosis: Conserved and Retained and Free-Living: Conserved and Retained

475

476 **Fig. S12. KEGG pathway for  $\beta$ -Alanine Metabolism, with colored enzymes indicating**  
 477 **KEGG IDs of ohnologs retained in duplicate annotated by PRIAM from the Conserved,**  
 478 **Retained, and Divergent WGCNA ohnolog-pair categories.**





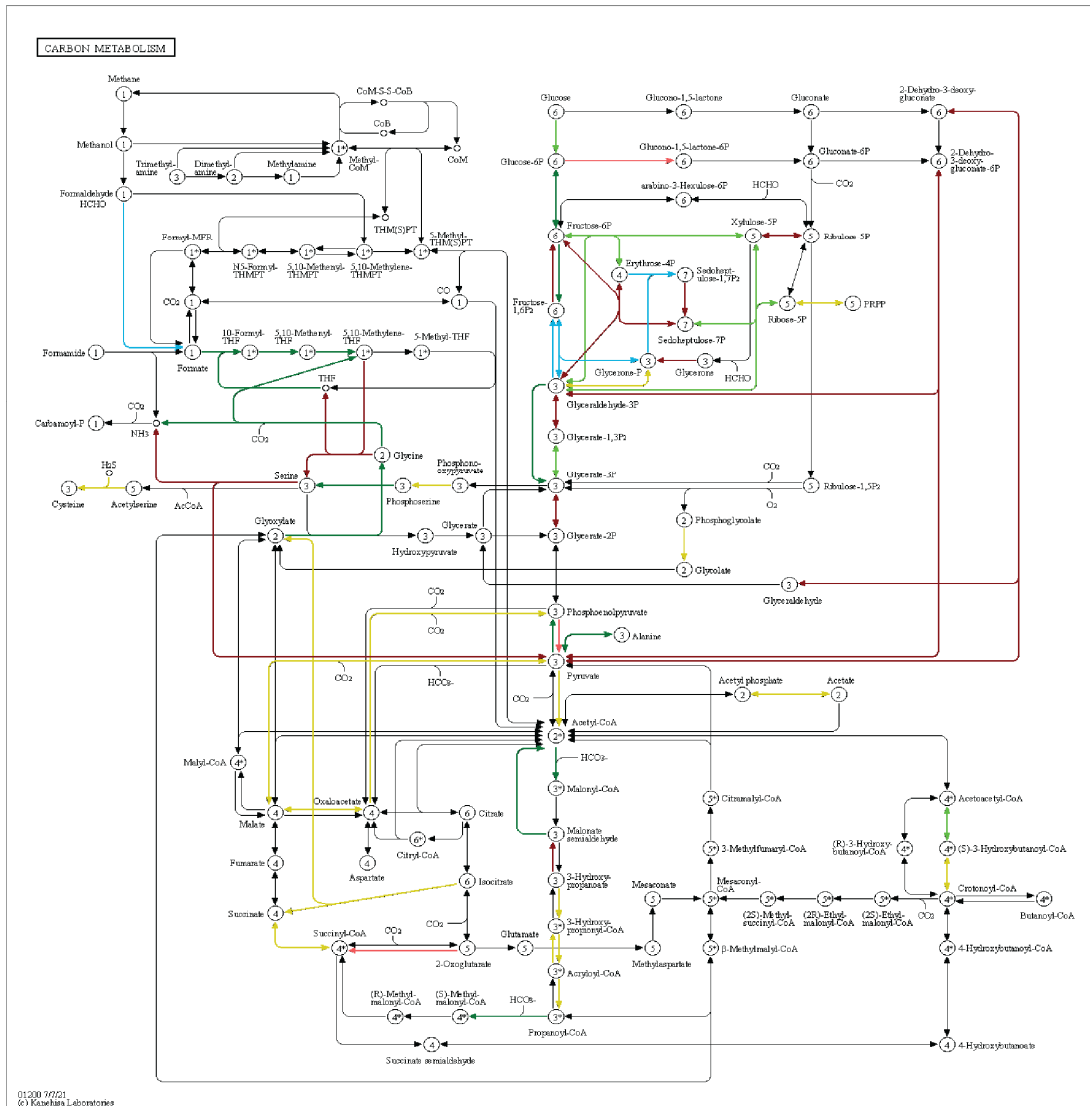

- Symbiosis: Conserved and Retained
- Symbiosis: Conserved and Retained and Divergent
- Free-Living: Conserved and Retained
- Free-Living: Conserved and Retained and Divergent
- Divergent
- Symbiosis: Conserved and Retained and Free-Living: Conserved and Retained

483

484 **Fig. S14. KEGG pathway for Carbon Metabolism, with colored enzymes indicating KEGG**

485 **IDs of ohnologs retained in duplicate annotated by PRIAM from the Conserved, Retained,**

486 **and Divergent WGCNA ohnolog-pair categories.**

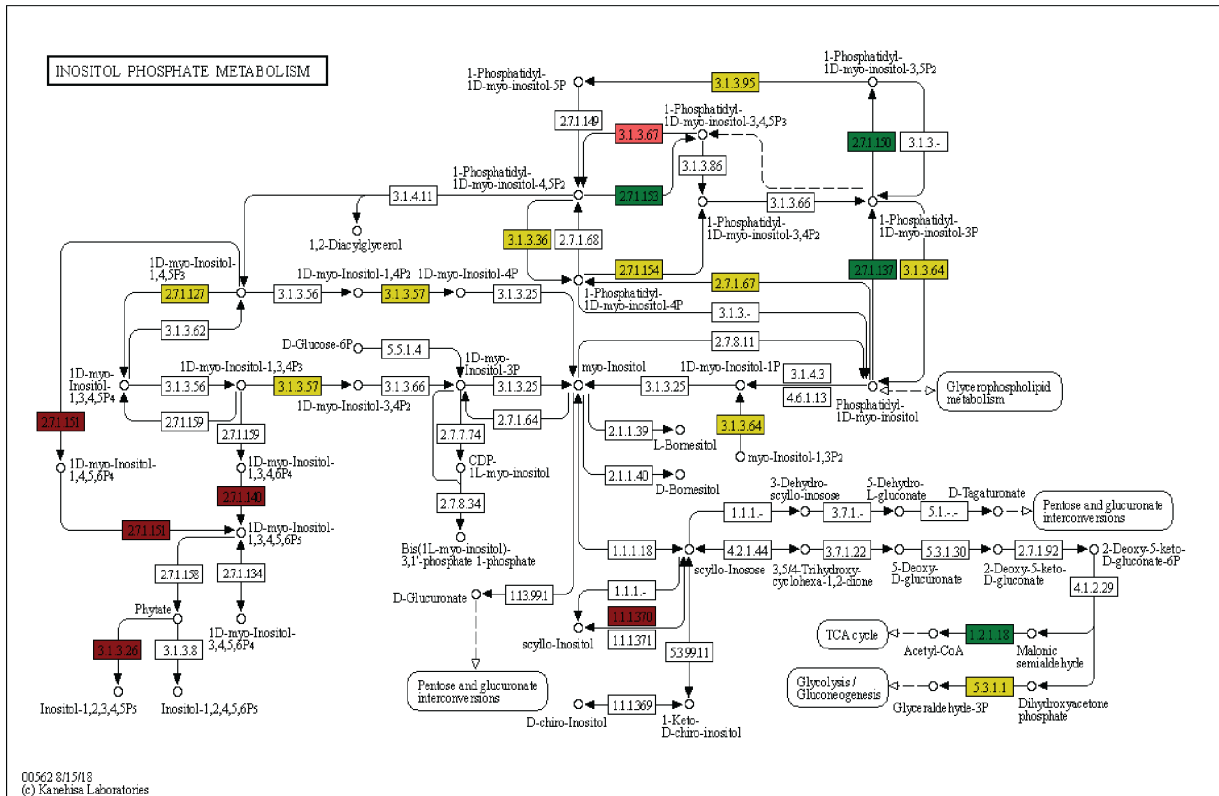

- Symbiosis: Conserved and Retained
- Symbiosis: Conserved and Retained and Divergent
- Free-Living: Conserved and Retained
- Free-Living: Conserved and Retained and Divergent
- Divergent
- Symbiosis: Conserved and Retained and Free-Living: Conserved and Retained

487

488 **Fig. S15. KEGG pathway for Inositol Phosphate Metabolism, with colored enzymes**  
 489 **indicating KEGG IDs of ohnologs retained in duplicate annotated by PRIAM from the**  
 490 **Conserved, Retained, and Divergent WGCNA ohnolog-pair categories.**

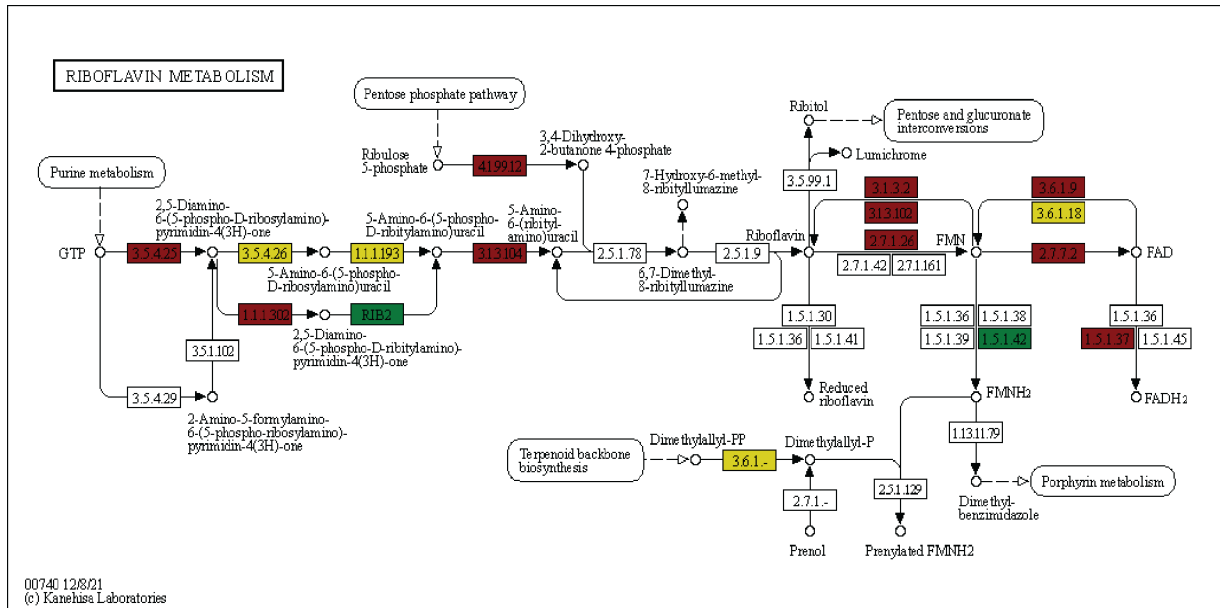

- Symbiosis: Conserved and Retained
- Symbiosis: Conserved and Retained and Divergent
- Free-Living: Conserved and Retained
- Free-Living: Conserved and Retained and Divergent
- Divergent
- Symbiosis: Conserved and Retained and Free-Living: Conserved and Retained

491

492 **Fig. S16. KEGG pathway for Riboflavin Metabolism, with colored enzymes indicating**

493 **KEGG IDs of ohnologs retained in duplicate annotated by PRIAM from the Conserved,**

494 **Retained, and Divergent WGCNA ohnolog-pair categories.**

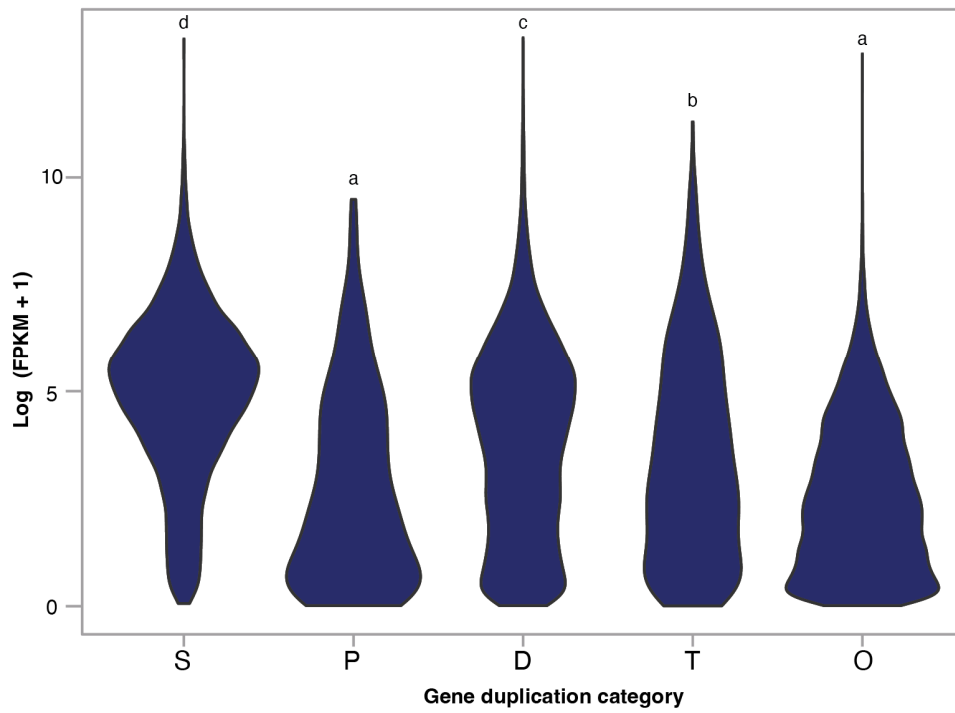

495

496 **Fig. S17. Gene expression violin plots across gene duplication categories.**

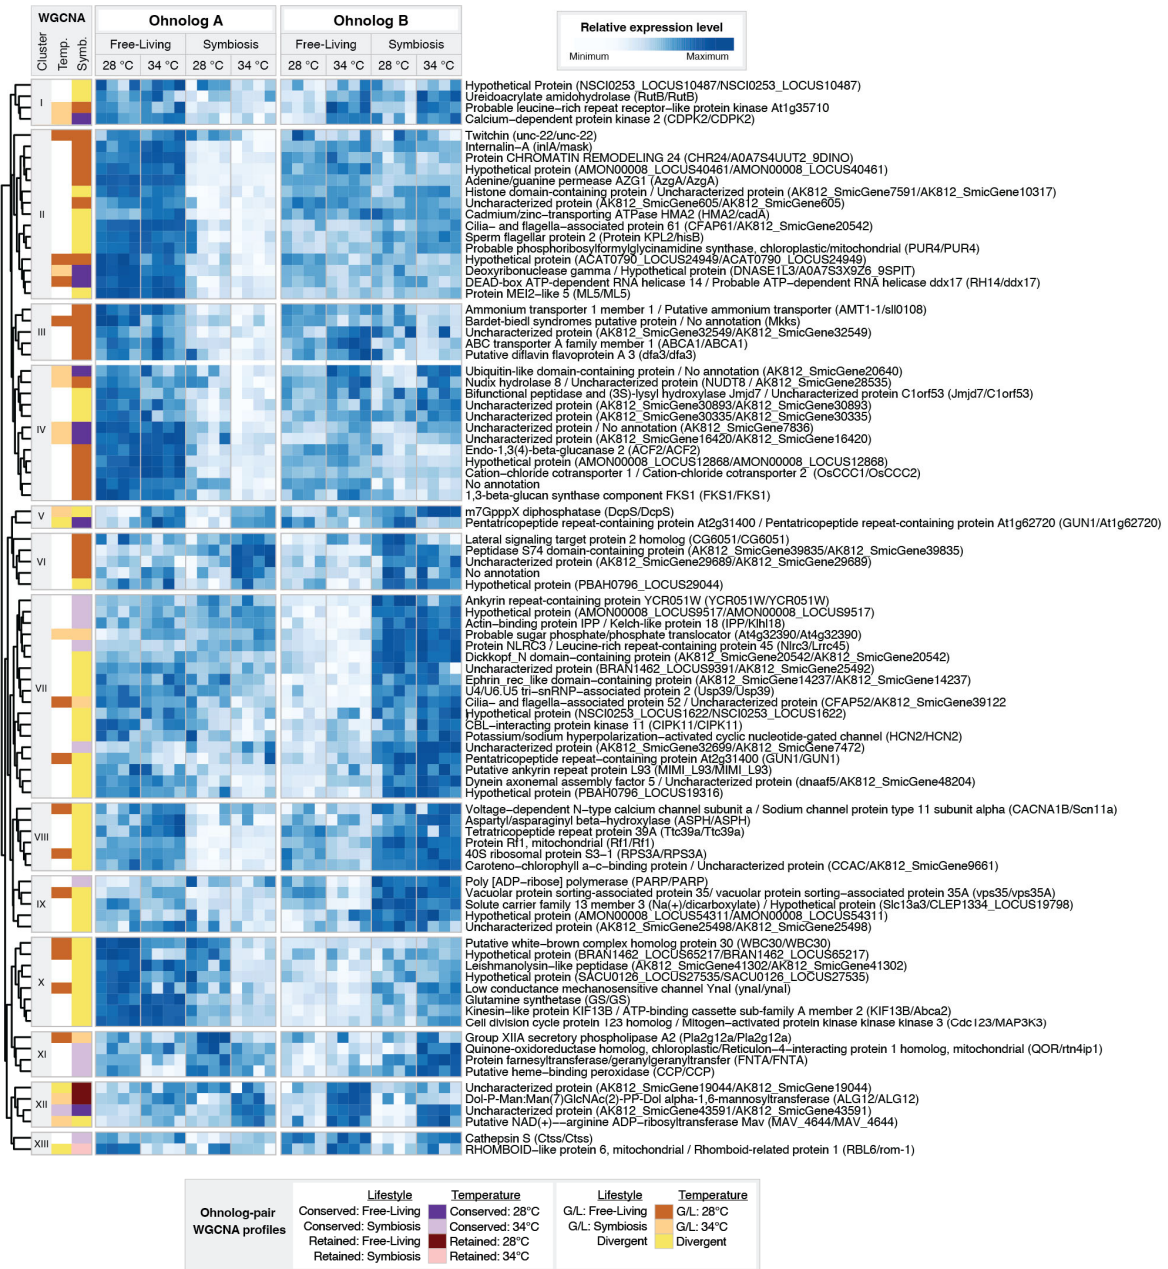

497

498 **Fig. S18. Gene expression heatmap of the 90 ohnolog-pairs exhibiting expression**

499 **dominance in different growth conditions.**

500 Ohnolog-pairs are clustered according to their expression patterns using Euclidean distances and

501 expression levels scaled within each row from the minimum to maximum value to allow

502 comparison of expression level between the two ohnologs in a pair.

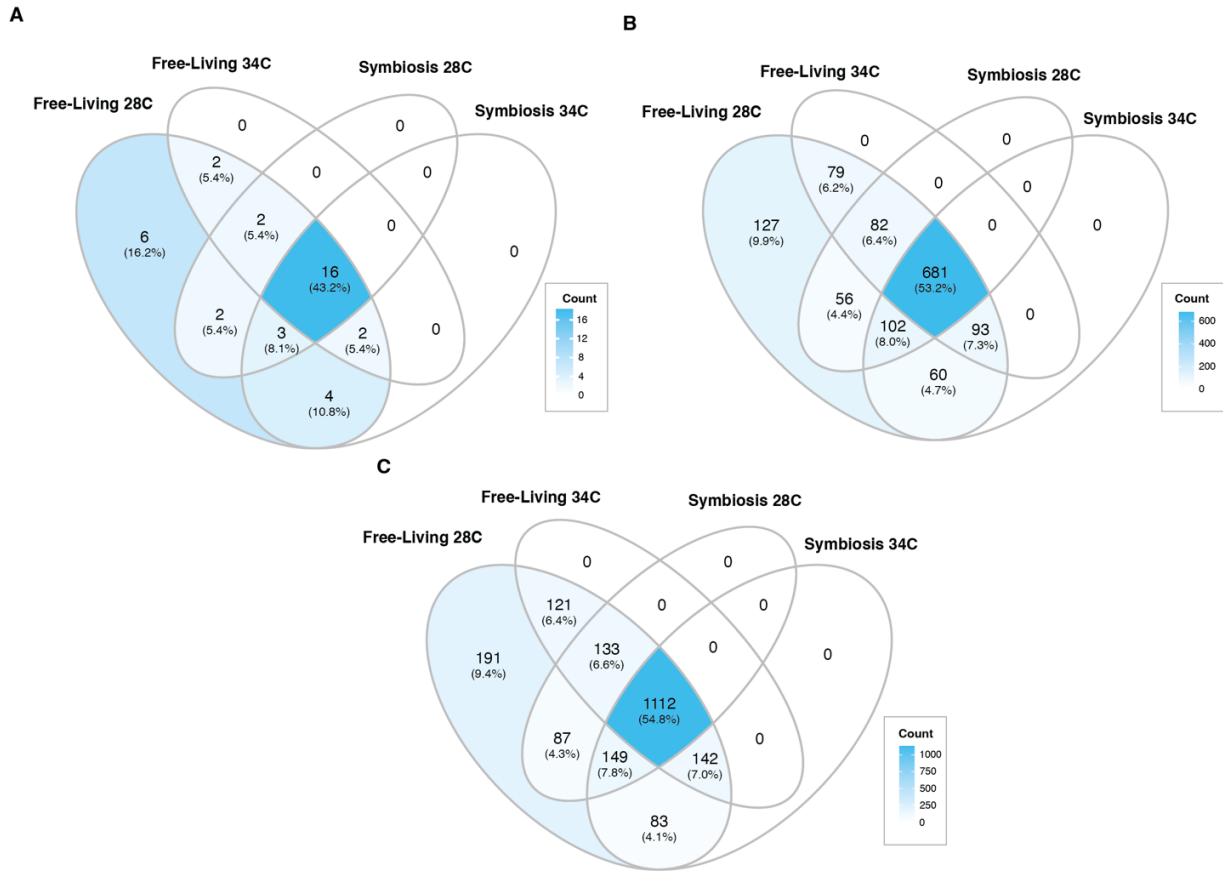

503

504 **Fig. S19. Summary of consensus mRNA-edited sites in CCMP2556 across the four RNaseq**  
 505 **treatments.**

506 The numbers represent the number of distinct edited sites for those that have a (A) high impact  
 507 (ie. stop gained, stop lost, start lost) on gene function (B) moderate (i.e. missense edit) impact on  
 508 gene function, and (C) all consensus edited sites including synonymous changes.

509

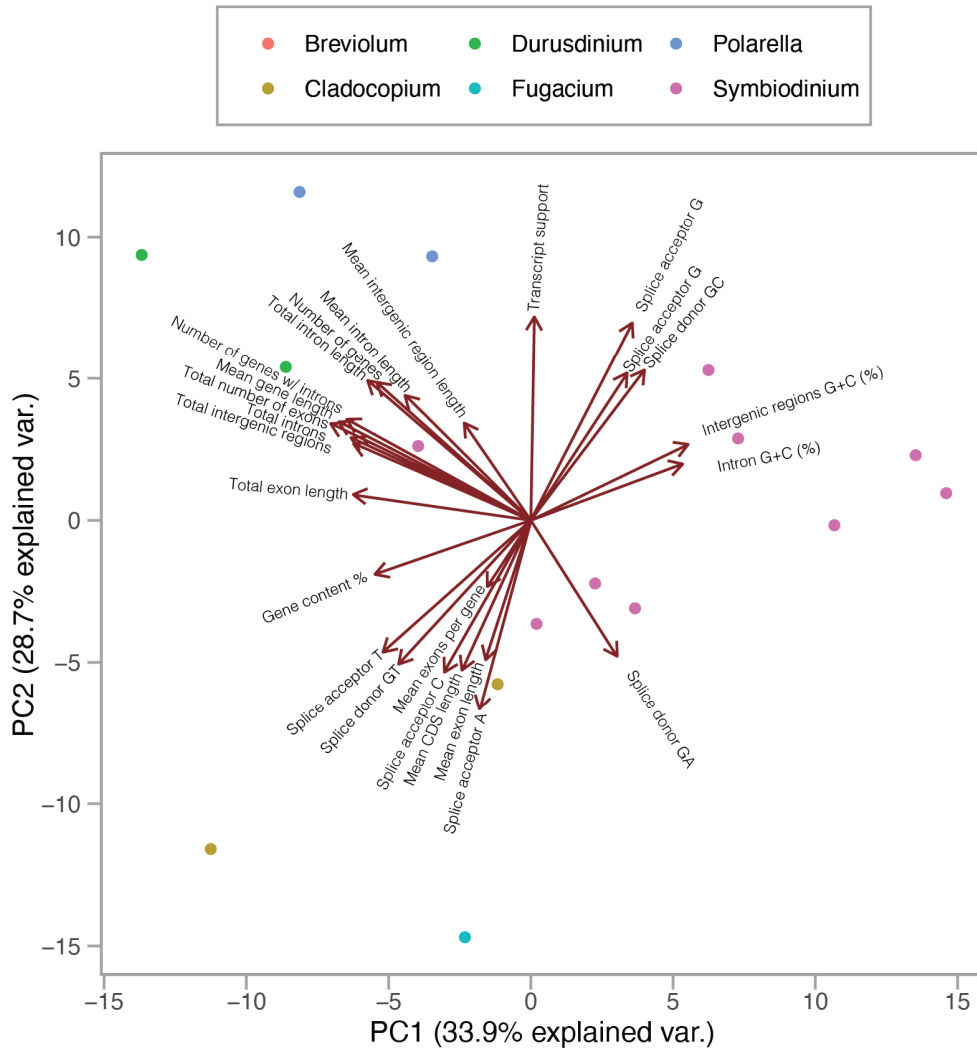

510

511 **Fig. S20. Principal component analysis of metrics of the gene model predictions within**

512 **Suessiales.**



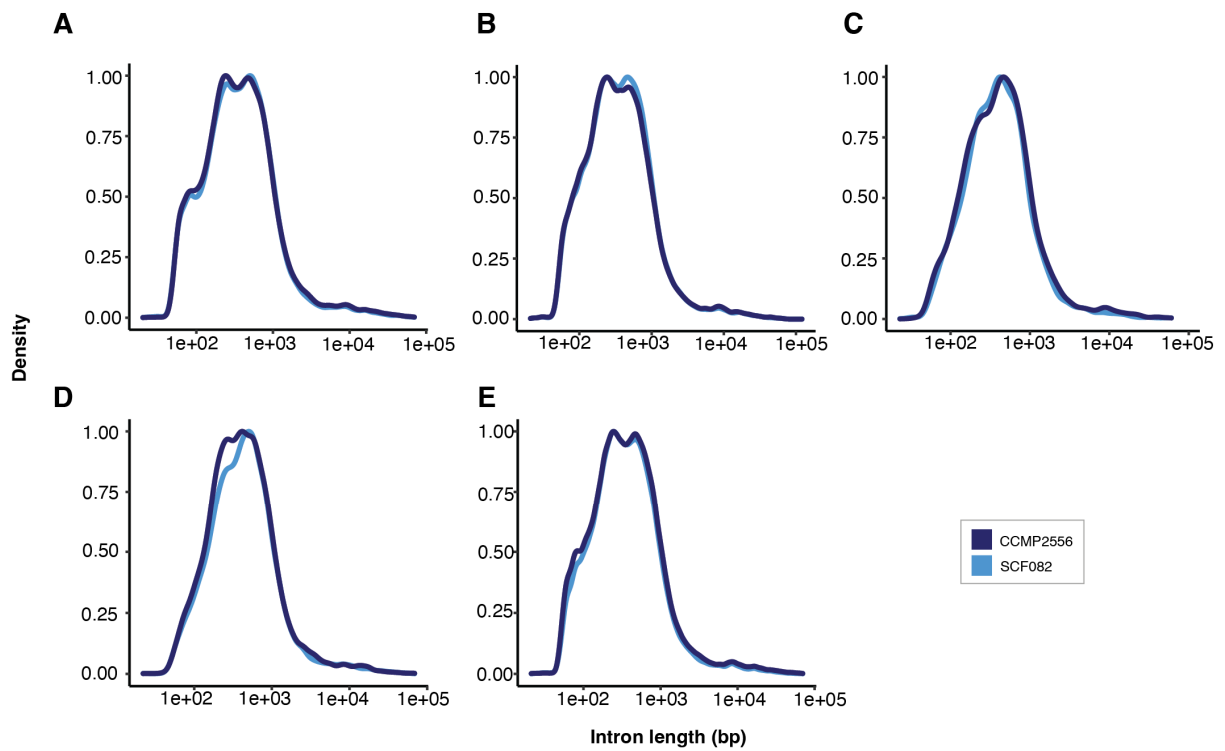

513

514 **Fig. S21. Intron length distribution across gene duplication categories.**

515 The intron length distribution across (A) singletons (B) proximal duplicates (C) dispersed

516 duplicates (D) tandem duplicates and (E) ohnologs.

517

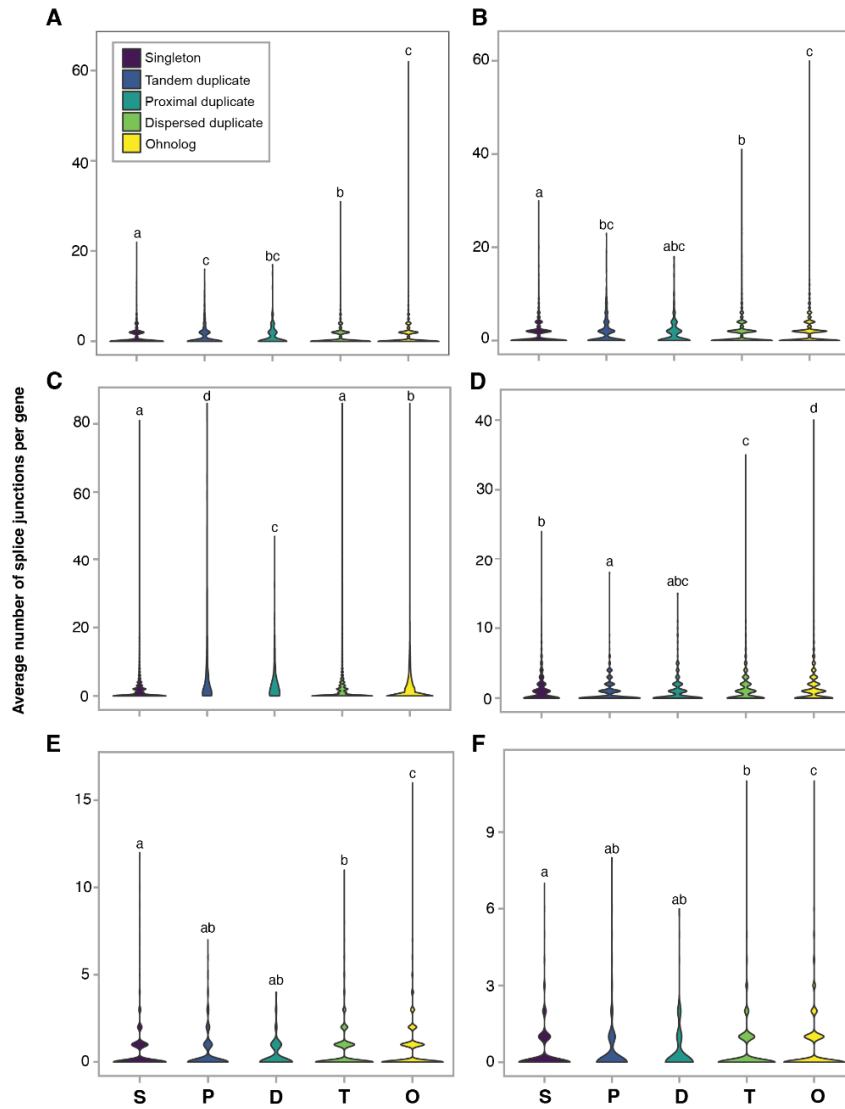

518

519 **Fig. S22. Violin plots of the average number of splice junctions per gene across the gene**  
 520 **duplication categories.**

521 The average number of splice junctions per gene is shown for the splice junction types (A)  
 522 alternate acceptor (B) alternate donor (C) alternate exon (D) retained intron (E) intron start and  
 523 (F) intron end. Statistically different groups identified through a Kruskal-Willis post-hoc test are  
 524 identified with letters above the plot.

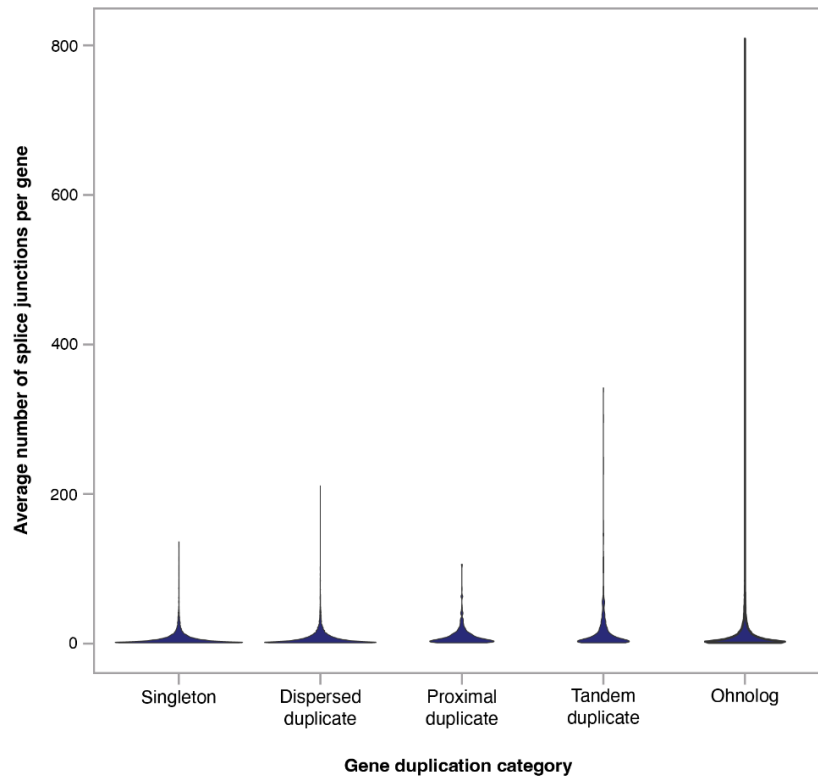

525

526 **Fig. S23. Splice site numbers per gene across duplication categories**

527

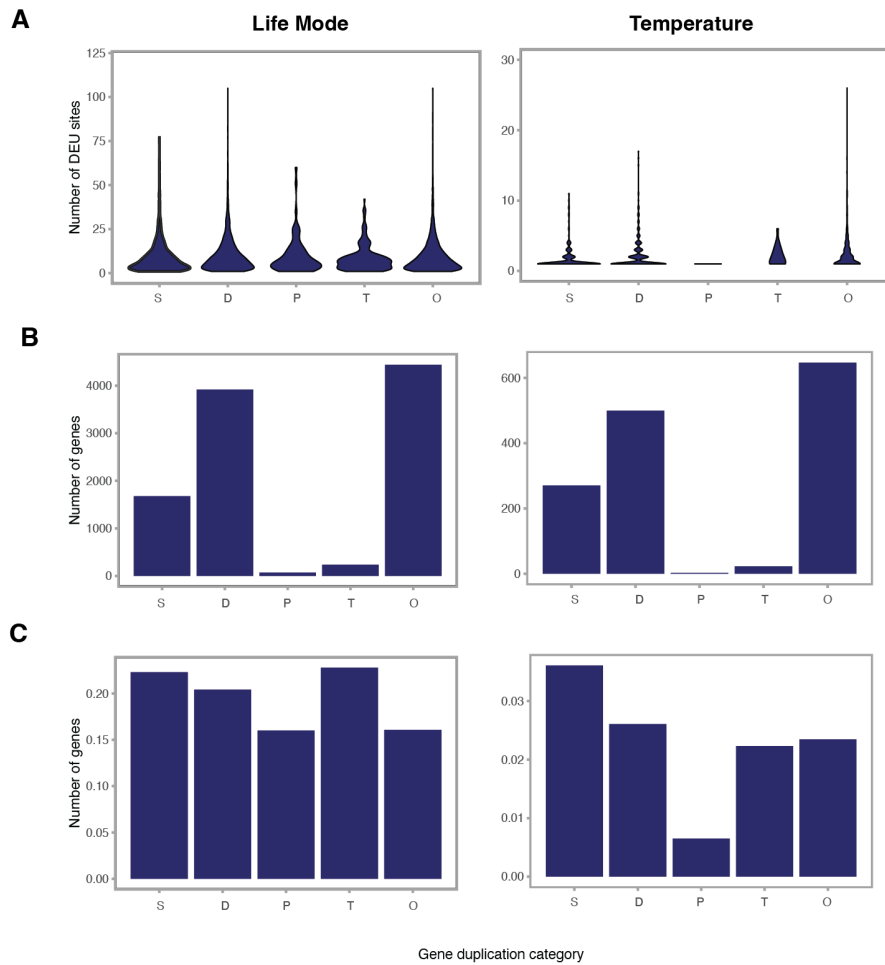

528

529 **Fig. S24. CCMP2556 Differential Exon Usage (DEU) summary**

530 Summary of the DEU results for both Life Mode and Temperature across the gene duplication  
 531 categories: Singleton, Dispersed duplicate, Proximal duplicate, Tandem duplicate, and Ohnolog.  
 532 representing the number of genes (FDR < 0.05) from each duplication category of Singleton,  
 533 Dispersed duplicate, Proximal duplicate, Tandem duplicate, and Ohnolog exhibiting at least one  
 534 site with DEU (adjusted  $p < 0.05$ ) in terms of (A) total genes and (B) proportion of genes. (C)  
 535 Violin plot of the number of significant DEU sites per gene.

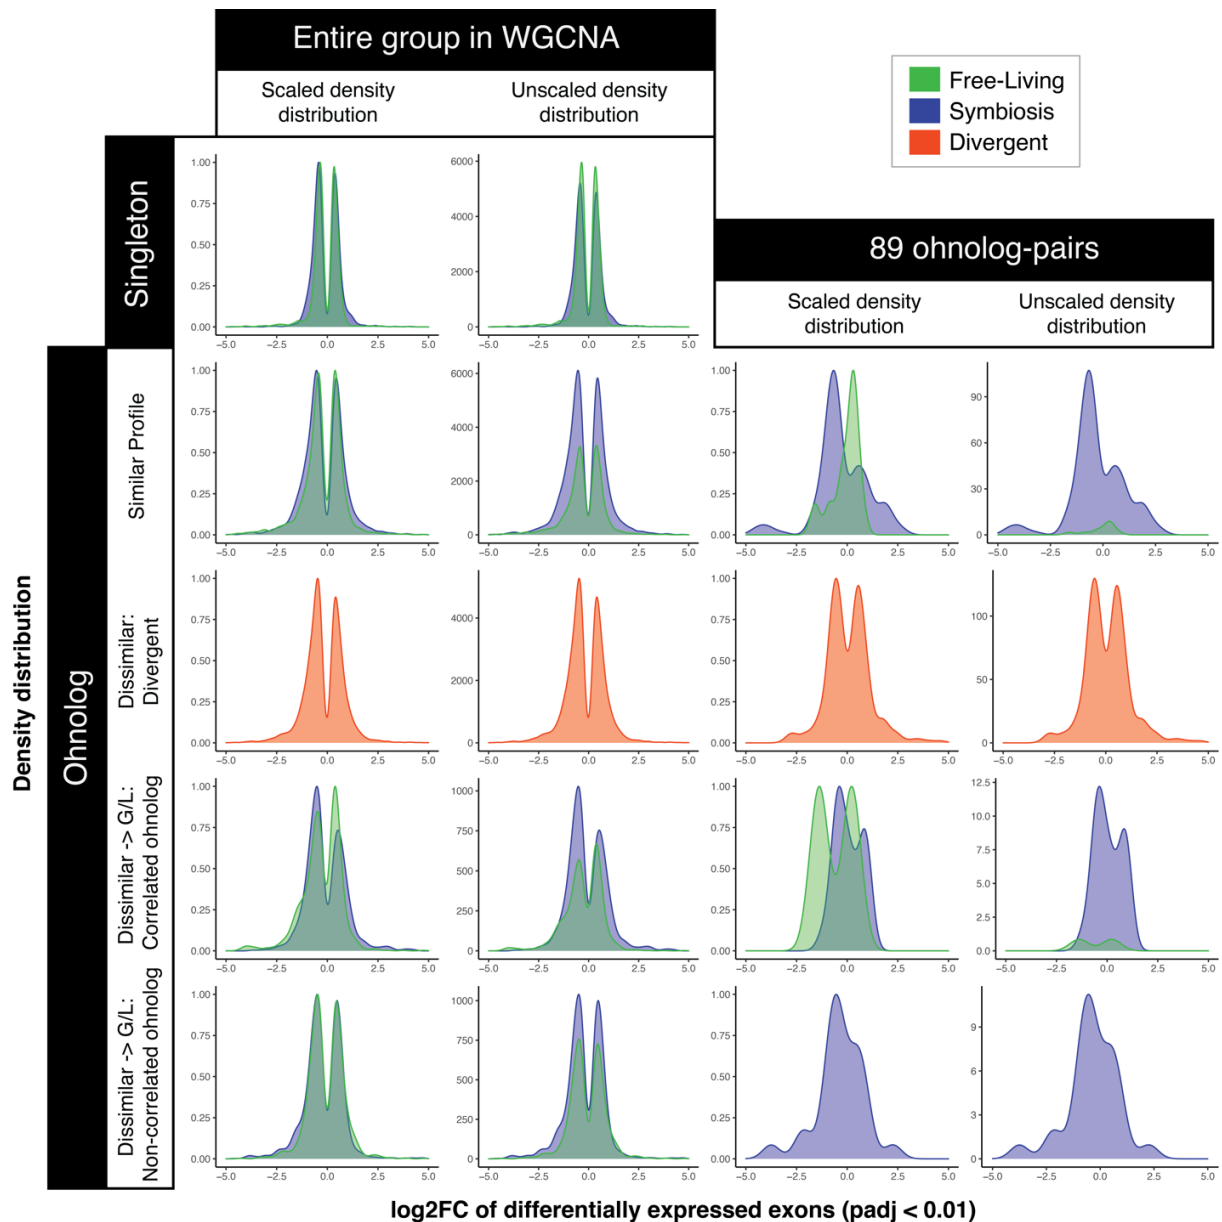

536

537 **Fig. S25. Density distribution of differentially used exons across different gene duplication**  
 538 **categories**

539 Scaled and unscaled density plots of the log2FC of differentially used exons ( $p < 0.001$ ) for (i)  
 540 singletons, (ii) all “Conserved” and “Retained” in context of lifestyle, (iii) the ohnolog from  
 541 “Gain/Loss” pairs exhibiting a correlation to lifestyle, and (iv) all ohnologs exhibiting a

542 correlation to a particular lifestyle from the 90 divergent ohnolog-pairs. Directionality of the  
543 log<sub>2</sub>FC change is indicated along the x-axis, with different colors indicating their gene-level  
544 correlation to either the free-living (green) or symbiotic (purple) lifestyles.

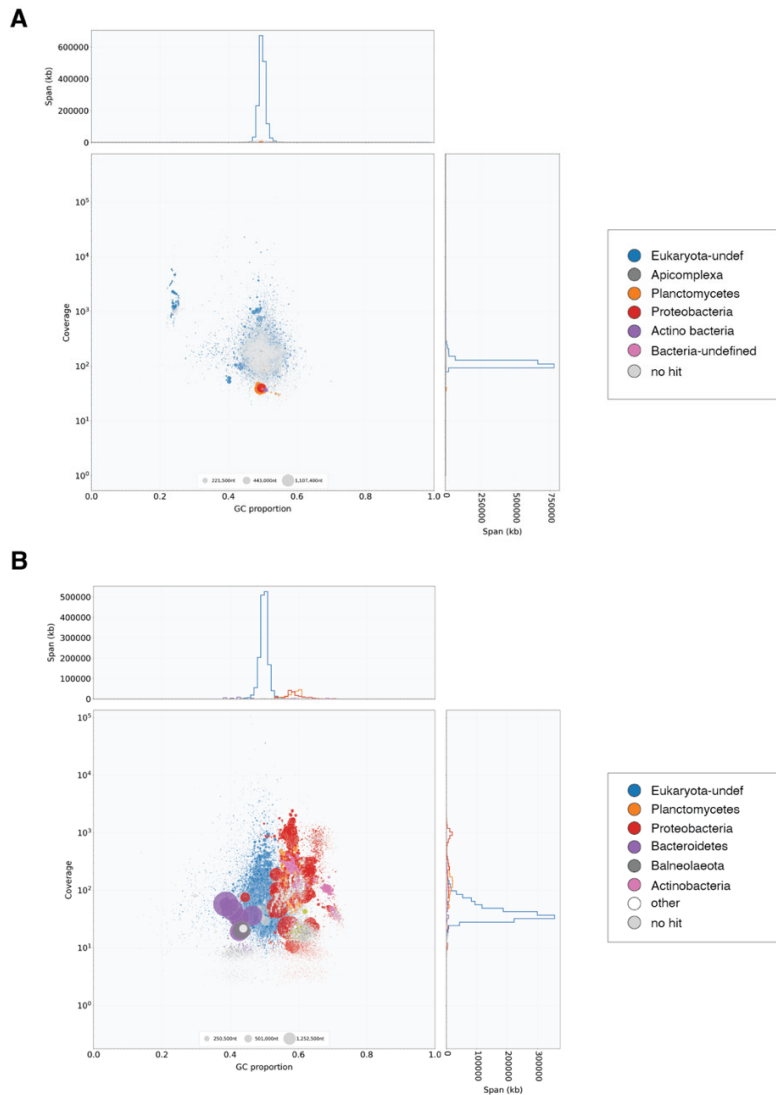

545

546 **Fig. S26. BlobsTools taxon-annotated GC-coverage plots for *D. trenchii* (A) CCMP2556 and**  
 547 **(B) SCF082 genome assemblies.**

548 Each dot represents a scaffold with read coverage on the y-axis and percent GC along the x-axis.  
 549 The size of each dot corresponds to the length of the scaffold and the color to the scaffold's taxa  
 550 annotation from BLAST.

551 **References:**

- 552 33. C. Iha *et al.*, Genomic adaptations to an endolithic lifestyle in the coral-associated alga  
553 *Ostreobium*. *Current Biology* **31**, 1393-1402. e1395 (2021).
- 554 34. D. R. Laetsch, M. L. Blaxter, BlobTools: Interrogation of genome assemblies.  
555 *F1000Research* **6**, 1287-1287 (2017).
- 556 35. P. Marks *et al.*, Resolving the full spectrum of human genome variation using Linked-  
557 Reads. *Genome Research* **29**, 635-645 (2019).
- 558 36. H. Li, Minimap2: pairwise alignment for nucleotide sequences. *Bioinformatics* **34**, 3094-  
559 3100 (2018).
- 560 37. W. Xue *et al.*, L\_RNA\_scaffolder: scaffolding genomes with transcripts. *BMC Genomics*  
561 **14**, 1-14 (2013).
- 562 38. M. Hiltunen, M. Ryberg, H. Johannesson, ARBitR: an overlap-aware genome assembly  
563 scaffolder for linked reads. *Bioinformatics* **37**, 2203-2205 (2021).
- 564 39. A. L. Delcher, S. L. Salzberg, A. M. Phillippy, Using MUMmer to identify similar  
565 regions in large sequence sets. *Current Protocols in Bioinformatics*, 10.13. 11-10.13. 18  
566 (2003).
- 567 40. Y. Chen, R. A. González-Pech, T. G. Stephens, D. Bhattacharya, C. X. Chan, Evidence  
568 that inconsistent gene prediction can mislead analysis of dinoflagellate genomes. *Journal*  
569 *of Phycology* **56**, 6-10 (2020).
- 570 41. F. A. Simão, R. M. Waterhouse, P. Ioannidis, E. V. Kriventseva, E. M. Zdobnov,  
571 BUSCO: assessing genome assembly and annotation completeness with single-copy  
572 orthologs. *Bioinformatics* **31**, 3210-3212 (2015).
- 573 42. D. M. Emms, S. Kelly, OrthoFinder: solving fundamental biases in whole genome  
574 comparisons dramatically improves orthogroup inference accuracy. *Genome Biology* **16**,  
575 157-157 (2015).
- 576 43. Y. Wang *et al.*, MCScanX: a toolkit for detection and evolutionary analysis of gene  
577 synteny and collinearity. *Nucleic Acids Research* **40**, e49 (2012).
- 578 44. A. Zwaenepoel, Y. Van de Peer, wgd—simple command line tools for the analysis of  
579 ancient whole-genome duplications. *Bioinformatics* **35**, 2153-2155 (2019).



- 580 45. A. J. Enright, S. Van Dongen, C. A. Ouzounis, Graph clustering by flow simulation.  
581 *Nucleic Acids Research* **30**, 1575-1584 (2000).
- 582 46. K. Katoh, D. M. Standley, MAFFT multiple sequence alignment software version 7:  
583 improvements in performance and usability. *Molecular Biology and Evolution* **30**, 772-  
584 780 (2013).
- 585 47. M. N. Price, P. S. Dehal, A. P. Arkin, FastTree 2—approximately maximum-likelihood  
586 trees for large alignments. *PLoS One* **5**, e9490 (2010).
- 587 48. Z. Yang, PAML 4: phylogenetic analysis by maximum likelihood. *Molecular Biology  
588 and Evolution* **24**, 1586-1591 (2007).
- 589 49. E. Shoguchi *et al.*, A new dinoflagellate genome illuminates a conserved gene cluster  
590 involved in sunscreen biosynthesis. *Genome Biology and Evolution* **13**, evaa235 (2021).
- 591 50. Y. Liao, G. K. Smyth, W. Shi, featureCounts: an efficient general purpose program for  
592 assigning sequence reads to genomic features. *Bioinformatics* **30**, 923-930 (2014).
- 593 51. D. J. Suggett, D. J. Smith, Coral bleaching patterns are the outcome of complex  
594 biological and environmental networking. *Global Change Biology* **26**, 68-79 (2020).
- 595 52. T. P. Hughes *et al.*, Emergent properties in the responses of tropical corals to recurrent  
596 climate extremes. *Current Biology* **31**, 5393-5399. e5393 (2021).
- 597 53. T. P. Hughes *et al.*, Spatial and temporal patterns of mass bleaching of corals in the  
598 Anthropocene. *Science* **359**, 80-83 (2018).
- 599 54. R. N. Silverstein, R. Cunning, A. C. Baker, Tenacious D: *Symbiodinium* in clade D  
600 remain in reef corals at both high and low temperature extremes despite impairment.  
601 *Journal of Experimental Biology* **220**, 1192-1196 (2017).
- 602 55. R. Cunning, P. Gillette, T. Capo, K. Galvez, A. C. Baker, Growth tradeoffs associated  
603 with thermotolerant symbionts in the coral *Pocillopora damicornis* are lost in warmer  
604 oceans. *Coral Reefs* **34**, 155-160 (2015).
- 605 56. R. N. Silverstein, R. Cunning, A. C. Baker, Change in algal symbiont communities after  
606 bleaching, not prior heat exposure, increases heat tolerance of reef corals. *Global Change  
607 Biology* **21**, 236-249 (2015).

- 608 57. A. Nand *et al.*, Genetic and spatial organization of the unusual chromosomes of the  
609 dinoflagellate *Symbiodinium microadriaticum*. *Nature Genetics* **53**, 618-629 (2021).
- 610 58. G. K. Marinov *et al.*, Transcription-dependent domain-scale three-dimensional genome  
611 organization in the dinoflagellate *Breviolum minutum*. *Nature Genetics* **53**, 613-617  
612 (2021).
- 613 59. E. F. Camp *et al.*, Proteome metabolome and transcriptome data for three  
614 Symbiodiniaceae under ambient and heat stress conditions. *Scientific Data* **9**, 153 (2022).
- 615 60. T. G. Stephens *et al.*, Genomes of the dinoflagellate *Polarella glacialis* encode tandemly  
616 repeated single-exon genes with adaptive functions. *BMC Biology* **18**, 1-21 (2020).
- 617 61. Y. J. Liew, Y. Li, S. Baumgarten, C. R. Voolstra, M. Aranda, Condition-specific RNA  
618 editing in the coral symbiont *Symbiodinium microadriaticum*. *PLoS Genetics* **13**,  
619 e1006619 (2017).
- 620 62. M. Kanehisa, S. Goto, S. Kawashima, Y. Okuno, M. Hattori, The KEGG resource for  
621 deciphering the genome. *Nucleic Acids Research* **32**, D277-D280 (2004).
